# Supplementary material
Source: PubMed Central journal article supplement (PMC5770568)
Supplement: mmc1.pdf [file mmc1.pdf]

**Biophysical Journal, Volume 113**

**Supplemental Information**

**Allosteric Modulation of Intact  $\gamma$ -Secretase Structural Dynamics**

**Ji Young Lee, Zhiwei Feng, Xiang-Qun Xie, and Ivet Bahar**

# Supplemental Methods

## *Analysis of Collective Modes using the Elastic Network Models ANM*

In the ANM, the protein is represented as a network where residues serve as the nodes, the positions of which are identified by those of  $\alpha$ -carbons, and the overall potential is represented as the sum of harmonic potentials between interacting nodes ( $C^\alpha-C^\alpha < 15\text{\AA}$ ) (1). The force constants for the  $3N \times 3N$  interactions (for  $N$  residues in  $3D$ ) are given by the elements of the Hessian matrix  $\mathbf{H}$ . The inverse  $\mathbf{H}^{-1}$  is proportional to the covariance of residue fluctuations away from their mean position. To achieve a conformation displaced along one of the ANM modes, we use the following equation:  $\mathbf{R}^{(k)} = \mathbf{R}^{(0)} \pm s\lambda_k^{-1/2} \mathbf{u}_k$ , where  $\mathbf{R}^{(0)}$  is a  $3N$ -dimensional vector representing initial coordinates,  $\lambda_k$  is eigenvalue, and  $\mathbf{u}_k$  is corresponding eigenvectors. We choose  $s$  where ANM conformers deviates by an RMSD of 4  $\text{\AA}$  from the initial structure (in [Figs. 2, 5, 8, S4, and S6](#)).

We used structure of  $\gamma$ -secretase (PDB ID 5FN2) (2) which has total 1309 residues and built membrane using an FCC lattice with a distance of 6.2  $\text{\AA}$  between nearest neighbors with 7 layers and a circular shape with 80  $\text{\AA}$  radius from the center of the protein (total 3108 nodes for membrane). The protein was positioned into membrane using Orientations of Proteins in Membrane (OPM) database (3). Our system has total 4417 nodes ( $N=4417$ ) and  $3N-6$  (13245) modes form a complete basis set for all possible motions of the  $3N$ -dimensional structure. The ANM calculation of  $\gamma$ -secretase in the absence of membrane in [Fig. 1D](#) uses only protein structure ( $N=1309$ ). All computations were performed using the ProDy API (4,5).

PULCHRA version 3.04 program (6) was used to add all backbone and side chain atoms to the conformers generated by the ANM. Energy-minimization was performed using NAMD for 2,000 steps.

## *Coarse-grained Molecular Dynamics Simulations*

The coarse-grained system of  $\gamma$ -secretase (PDB ID 5FN2) (2) and lipid bilayer and MD set-up was prepared using GHARMM-GUI Martini bilayer maker (7), and simulations were performed using GROMACS version 5.1.4 (8) with MARTINI force field v2.2 (9). All the systems were relaxed using equilibration steps, and two independent NPT simulations were performed for 10  $\mu\text{s}$  each with 20 fs time step. The temperature was set to 310 K using V-rescale coupling, and the pressure was set to 1.0 bar using semi-isotropic Parrinello-Rahman coupling. The system has 1,309 residues, 414 POPC lipid sites, 13,355 water molecules, 155  $\text{Na}^+$  ions, and 150  $\text{Cl}^-$  ions, i.e. a total of 21,561CG sites simulated in a 130  $\text{\AA}$  x 130  $\text{\AA}$  x 150  $\text{\AA}$  box.

## ***Principal Component Analysis (PCA) of MD Trajectories***

The principal component analysis using MD snapshots or experimental structures was used to extract principal changes in structure (4,10). Principal modes were obtained by decomposing the covariance matrix  $\mathbf{C}$  for each dataset as  $\mathbf{C} = \sum_{i=1}^{3N} \sigma_i \mathbf{P}^{(i)} \mathbf{P}^{(i)T}$  where  $\mathbf{P}^{(i)}$  and  $\sigma_i$  are the respective  $i$ th eigenvalue and eigenvector of  $\mathbf{C}$ ,  $\sigma_i$  corresponding to the largest variance component. The fractional contribution of the principal component (eigenvector)  $\mathbf{P}^{(i)}$  to structural variance in the dataset is given by  $f_i = \sigma_i / \sum_j \sigma_j$  where the summation is performed over all components (note that  $\sigma_i$  is equivalent to  $1/\lambda_i$  obtained from ANM). All computations were performed using the ProDy API (4,5).

## ***Druggability Simulations and Trajectory Analysis***

All atom MD systems and set-up were prepared using DruGUI (11) in VMD (12). We performed 3 independent simulations of intact  $\gamma$ -secretase (PDB ID 5FN2) including probe molecules in a water box. Our system has 25,600 water and 1,280 probe molecules, which gives a ratio of 20 water molecules per probe molecule as used in our previous study (11). The probe molecules were evenly distributed in the box. We included four different probe molecules, 896 isopropanol (70%), 128 isopropylamine (10%), 128 acetate (10%), and 128 acetamide (10%) molecules. The system contained a total of 112,132 atoms of protein, probes, waters, and ions. MD simulations were performed using NAMD (13), and we relaxed the systems using equilibration steps and performed NPT dynamics for 40 ns for each (total 120 ns) with 2 fs time step. Nosé-Hoover constant pressure (1 bar) and temperature (300 K) were used. We also performed 5 independent all atom MD simulations including probe molecules for the PS1 subunit of  $\gamma$ -secretase (PDB ID 5FN2). This system includes 252 isopropanol (70%), 36 isopropylamine (10%), 36 acetate (10%), 36 acetamide (10%), and 7200 water molecules. Other simulation setups are same as in intact protein.

For trajectory analysis, all MD snapshots were superposed onto the reference PDB structure of the protein using  $C^\alpha$  atoms and a cubical grid-based representation of the space. Grid edge size was set to 0.5 Å. Probe molecules having a nonhydrogen atom within 2.5 Å from protein atoms were considered to interact with the protein. For each probe type, the individual occupancy of grids was calculated using their central carbon atoms. We obtain occupancy of each probe for a given voxel. High occupancy voxels, called hot spots, within a distance less than 5.5 Å were merged and druggable sites were defined upon merger of at least 6 hot spots. More details are available in our previous study (11) as well as ProDy tutorial. All computations were performed using DruGUI in the ProDy API (4,5).

## ***Docking of Small Molecules***

The PDB structure of  $\gamma$ -secretase (2) was used as target for docking  $\gamma$ -secretase ligands, including DAPT, BMS-708163, ChEMBL2159511, ChEMBL2159687 and ChEMBL2159691, and  $\gamma$ -

secretase modulators of E2012 and ST1120. Also, the closed ANM conformers along mode 1 (**Fig. 5**), mode 7 (**Fig. S4**), and mode 14, and the open conformer along ANM mode 14 (**Fig. 8**) were used as targets. Surflex-Dock, a docking program implemented in SYBYL-X 1.3, was used to generate detailed receptor-ligands interactions. We used the same protocol for docking as reported in our previous publications (14-17). Briefly, **(A)** energy minimizations of 3D structure of  $\gamma$ -secretase was performed using SYBYL-X 1.3. The parameters defined in the SYBYL were as follows: Gradient was set to 0.5 kcal/mol, max iterations were set to 5000, force field was selected as MMFF94s, and that for the charges was MMFF94. **(B)** The putative binding cavity of  $\gamma$ -secretase was predicted and generated using SYBYL-X 1.3 by a similar protocol, with the Threshold set to 0.50 while the Bloat was set to 0. **(C)** The following docking parameters were used. (a) The number of starting conformations per ligand was set to 10; max conformations per fragment was set to 20, (b) maximum number of rotatable bonds per molecule was 100, (c) the flags were turned on at pre-dock minimization, post-dock minimization, molecule fragmentation, soft grid treatment, (d) activate spin alignment method with density of search was set to 9.0, and (e) number of spins per alignment was set to 12. **(D)** Result optimizations were carried out by allowing the protein movements with both hydrogen and heavy atoms.

## REFERENCES

1. Atilgan, A. R., S. R. Durell, R. L. Jernigan, M. C. Demirel, O. Keskin, and I. Bahar. 2001. Anisotropy of fluctuation dynamics of proteins with an elastic network model. *Biophys. J.* 80:505-515.
2. Bai, X. C., E. Rajendra, G. H. Yang, Y. G. Shi, and S. H. W. Scheres. 2015. Sampling the conformational space of the catalytic subunit of human  $\gamma$ -secretase. *Elife* 4.
3. Lomize, M. A., A. L. Lomize, I. D. Pogozheva, and H. I. Mosberg. 2006. OPM: orientations of proteins in membranes database. *Bioinformatics* 22:623-625.
4. Bakan, A., L. M. Meireles, and I. Bahar. 2011. ProDy: protein dynamics inferred from theory and experiments. *Bioinformatics* 27:1575-1577.
5. Bakan, A., A. Dutta, W. Mao, Y. Liu, C. Chennubhotla, T. R. Lezon, and I. Bahar. 2014. Evol and ProDy for bridging protein sequence evolution and structural dynamics. *Bioinformatics* 30:2681-2683.
6. Rotkiewicz, P. and J. Skolnick. 2008. Fast procedure for reconstruction of full-atom protein models from reduced representations. *J. Comput Chem.* 29:1460-1465.
7. Qi, Y., H. I. Ingolfsson, X. Cheng, J. Lee, S. J. Marrink, and W. Im. 2015. CHARMM-GUI Martini maker for coarse-grained simulations with the Martini force field. *J. Chem. Theory Comput* 11:4486-4494.

8. Szilárd Páll, Mark James Abraham, Carsten Kutzner, Berk Hess, and Erik Lindahl. 2015. Tackling exascale software challenges in molecular dynamics simulations with GROMACS. *Solving Software Challenges for Exascale* 8759:3-27.
9. de Jong, D. H., G. Singh, W. F. Bennett, C. Arnarez, T. A. Wassenaar, L. V. Schafer, X. Periole, D. P. Tieleman, and S. J. Marrink. 2013. Improved parameters for the Martini coarse-grained protein force field. *J. Chem. Theory Comput* 9:687-697.
10. Amadei, A., A. B. Linssen, and H. J. Berendsen. 1993. Essential dynamics of proteins. *Proteins* 17:412-425.
11. Bakan, A., N. Nevins, A. S. Lakdawala, and I. Bahar. 2012. Druggability assessment of allosteric proteins by dynamics simulations in the presence of probe molecules. *Journal of Chemical Theory and Computation* 8:2435-2447.
12. Humphrey, W., A. Dalke, and K. Schulten. 1996. VMD: visual molecular dynamics. *J. Mol. Graph.* 14:33-38.
13. Phillips, J. C., R. Braun, W. Wang, J. Gumbart, E. Tajkhorshid, E. Villa, C. Chipot, R. D. Skeel, L. Kale, and K. Schulten. 2005. Scalable molecular dynamics with NAMD. *J. Comput Chem.* 26:1781-1802.
14. Feng, Z., M. H. Alqarni, P. Yang, Q. Tong, A. Chowdhury, L. Wang, and X. Q. Xie. 2014. Modeling, molecular dynamics simulation, and mutation validation for structure of cannabinoid receptor 2 based on known crystal structures of GPCRs. *J. Chem. Inf. Model.* 54:2483-2499.
15. Feng, Z., L. V. Pearce, X. Xu, X. Yang, P. Yang, P. M. Blumberg, and X. Q. Xie. 2015. Structural insight into tetrameric hTRPV1 from homology modeling, molecular docking, molecular dynamics simulation, virtual screening, and bioassay validations. *J. Chem. Inf. Model.* 55:572-588.
16. Xie, X. Q., J. Z. Chen, and E. M. Billings. 2003. 3D structural model of the G-protein-coupled cannabinoid CB2 receptor. *Proteins* 53:307-319.
17. Chen, J. Z., J. Wang, and X. Q. Xie. 2007. GPCR structure-based virtual screening approach for CB2 antagonist search. *J. Chem. Inf. Model.* 47:1626-1637.

## Supplemental Figures

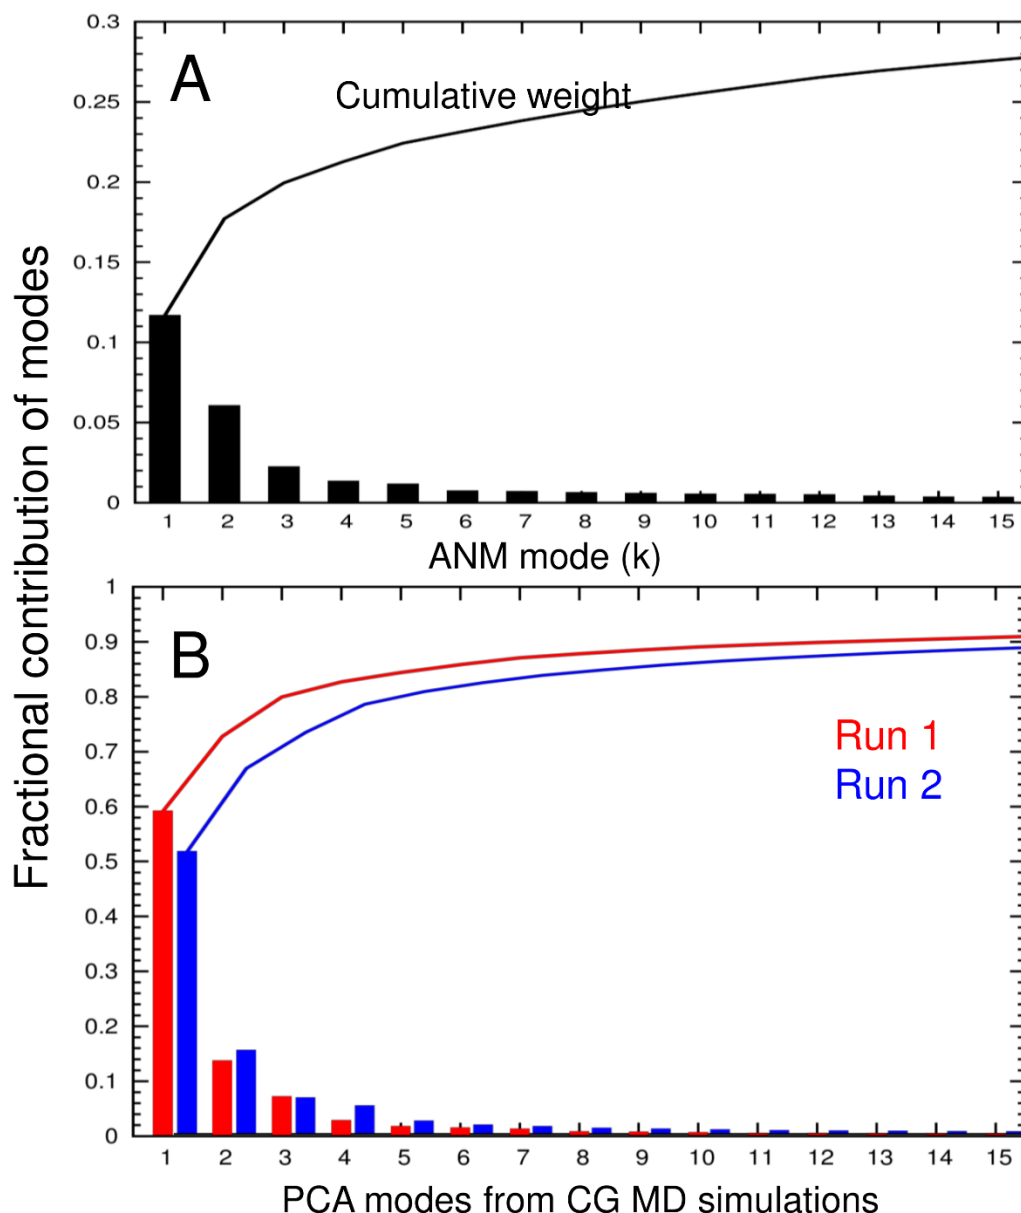

**Figure S1. Eigenvalue spectrum obtained by ANM analysis and PCA of two CG MD trajectories generated for  $\gamma$ -secretase complex. (A)** Inverse eigenvalues plotted against ANM mode index. The bar values are  $(1/\lambda_k) / \Sigma(1/\lambda_k)$ , where  $k$  is mode number,  $\lambda_k$  is eigenvalue of mode  $k$ , and  $\Sigma$  is summation over all modes (total of  $3N-6$  modes,  $N$  is 1309,  $\gamma$ -secretase residue numbers, using the system-environment method in ProDy). The cumulative contribution summed over all modes is shown. **(B)** Same distribution obtained from PCA of the covariance generated from CG MD runs 1 and 2.

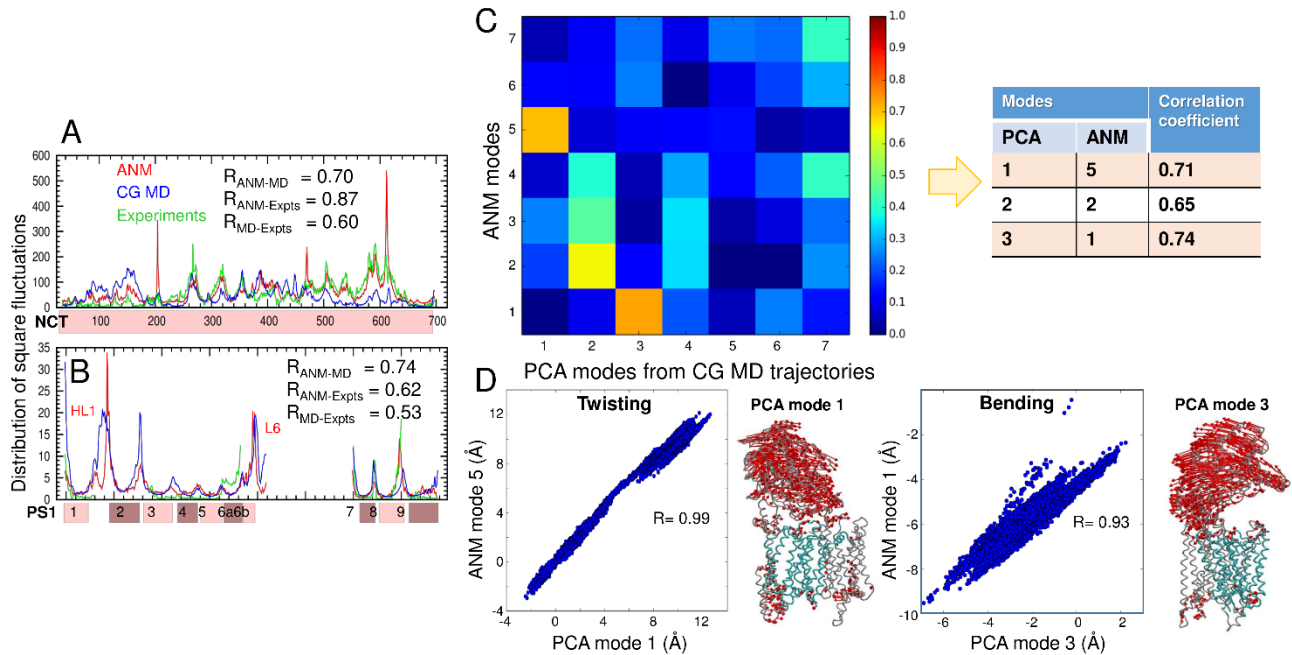

**Figure S2. Mobility of  $\gamma$ -secretase observed in CG MD simulations.** The panels represent the same properties, as in Fig. 3, but we displayed here the results from the 2<sup>nd</sup> CG MD run.

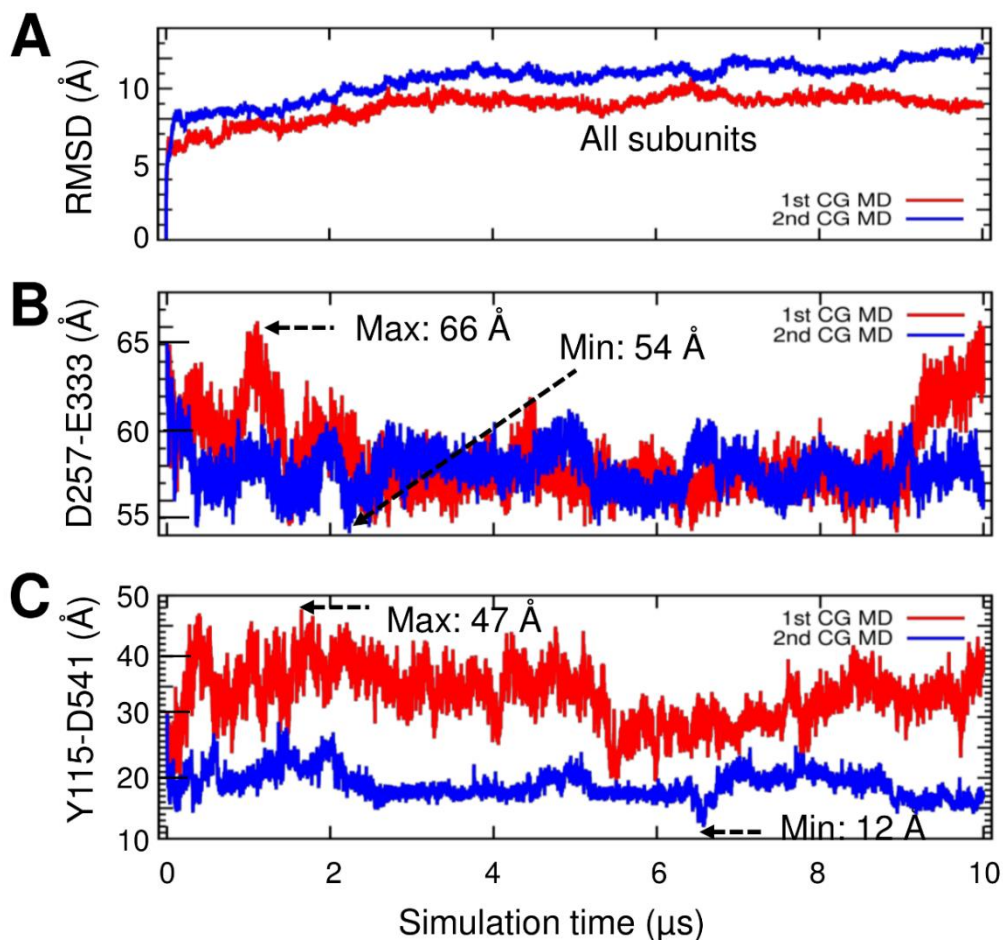

**Figure S3. Mobility of NCT with respect to PS1 in CG MD simulations.** (A) RMSD of whole protein including the four subunits for two independent 10  $\mu\text{s}$  simulations. 1<sup>st</sup> and 2<sup>nd</sup> simulations are in *red* and *blue lines*, respectively. (B) Time evolution of the distance between D257(PS1) and E333(NCT). (C) Time evolution of the distance between Y115(PS1) and D541(NCT). Maximum and minimum distances are indicated by arrows in both panels (B) and (C).



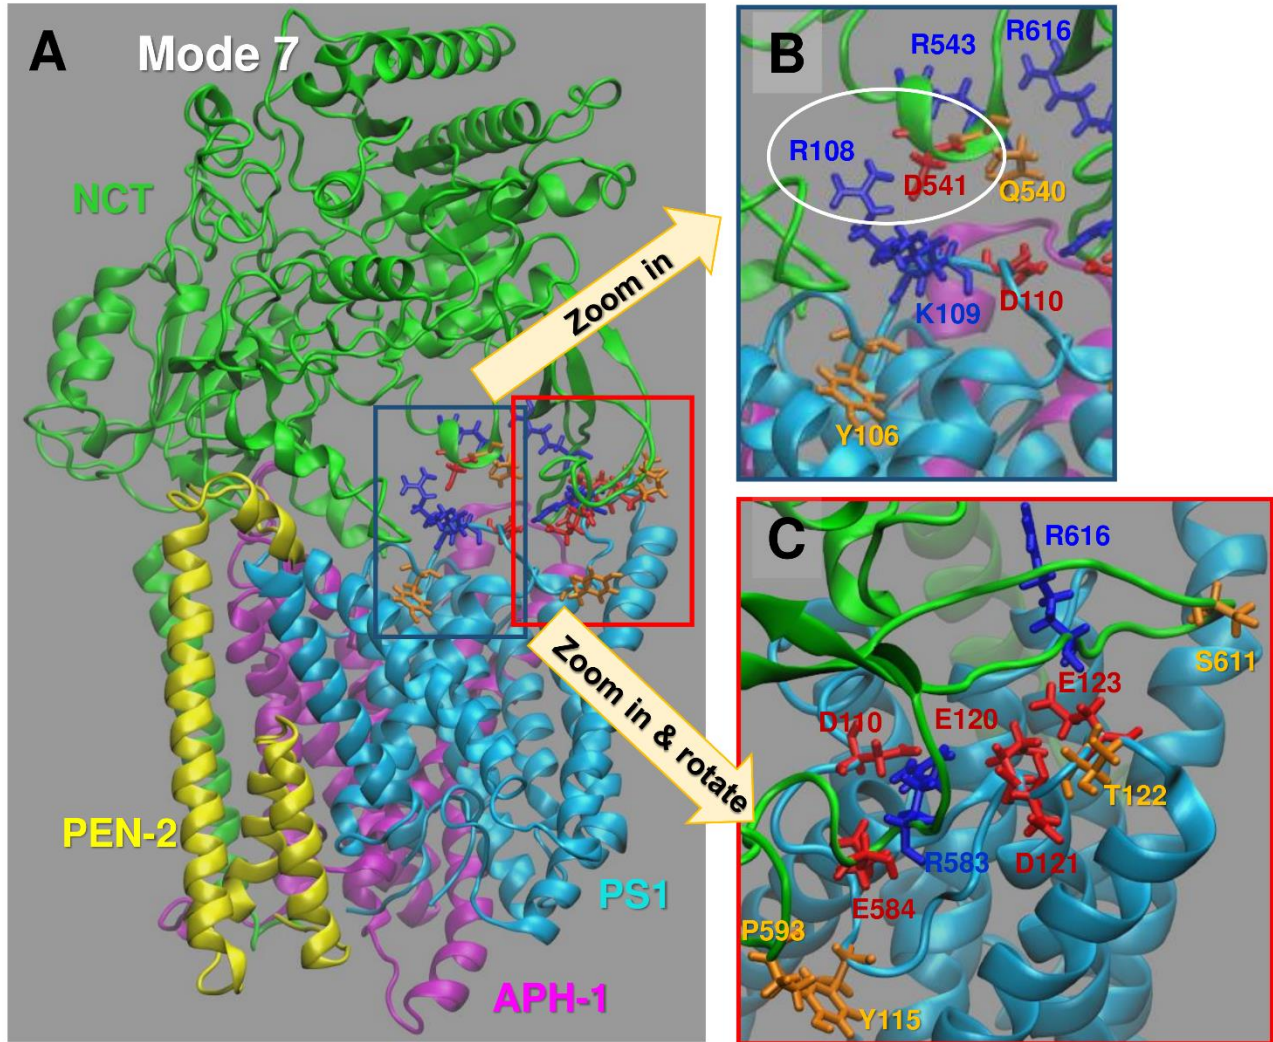

**Figure S4.** NCT and PS1 residues distinguished by their high mobility make intersubunit contacts facilitated by the global bending mode of the complex. **(A)** Closed form attainable upon reconfiguration of the complex along ANM mode 7. The size of the motion along mode 7 has been selected to yield an RMSD of 4 Å from the initial structure. Residues Q540, D541, R543, R583, E584, P593, S611, and R616 in NCT, and Y106, R108, K109, D110, Y115, E120, D121, T122, and E123 in the hydrophilic loop HL1 of PS1 are shown in *sticks* colored *red* (negatively charged), *blue* (positively charged), or *orange* (polar). We note the inter-subunit salt bridge D541-R108 (encircled in **B**). See also **Fig. 2** and **Table S1** for inter-residue and inter-atomic distances in the closed form.

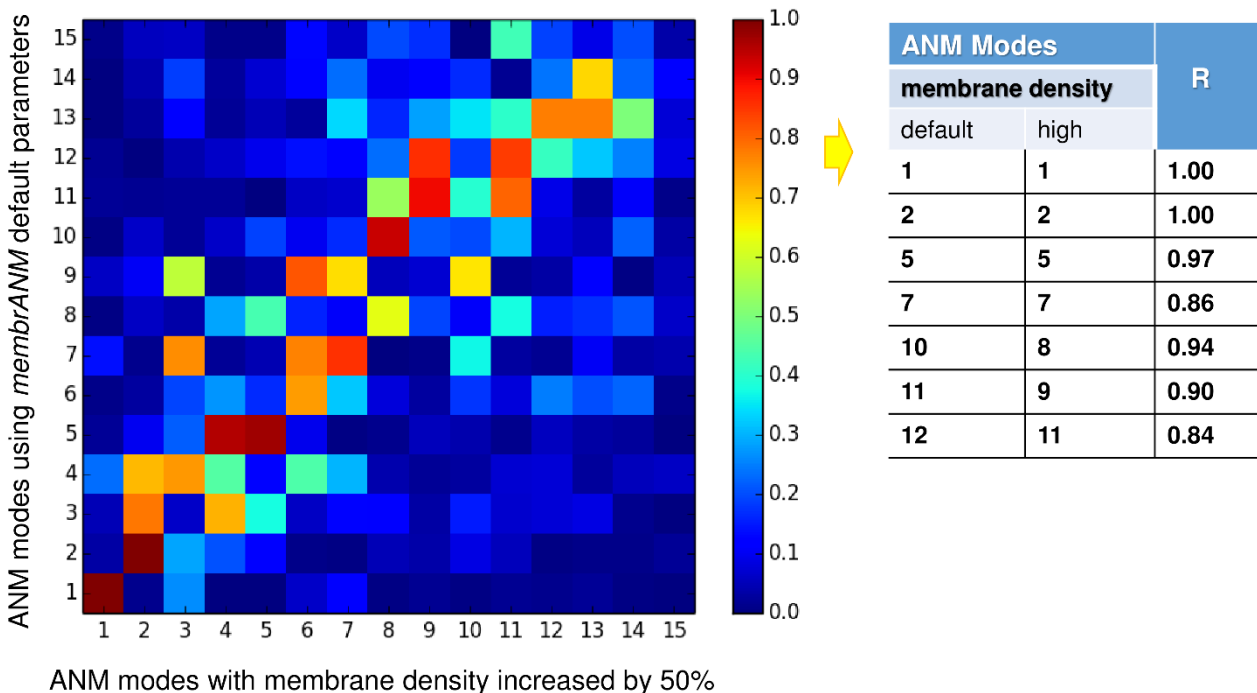

**Figure S5. Comparison of the soft modes obtained for  $\gamma$ -secretase-membrane system using two different densities for the lipid bilayer.** The ordinate refers to the original membrANM modes, obtained with default parameters in ProDy. The abscissa are the results obtaining by building a denser network model for the membrane (using 50% more network nodes). The diagram shows the correlation between the two sets of ANM modes, after taking the absolute values of the eigenvectors (as both directions of fluctuations are equivalent). The table on the right lists the correlation coefficients between selected pairs, the high density referring to the abscissa of the correlation map.

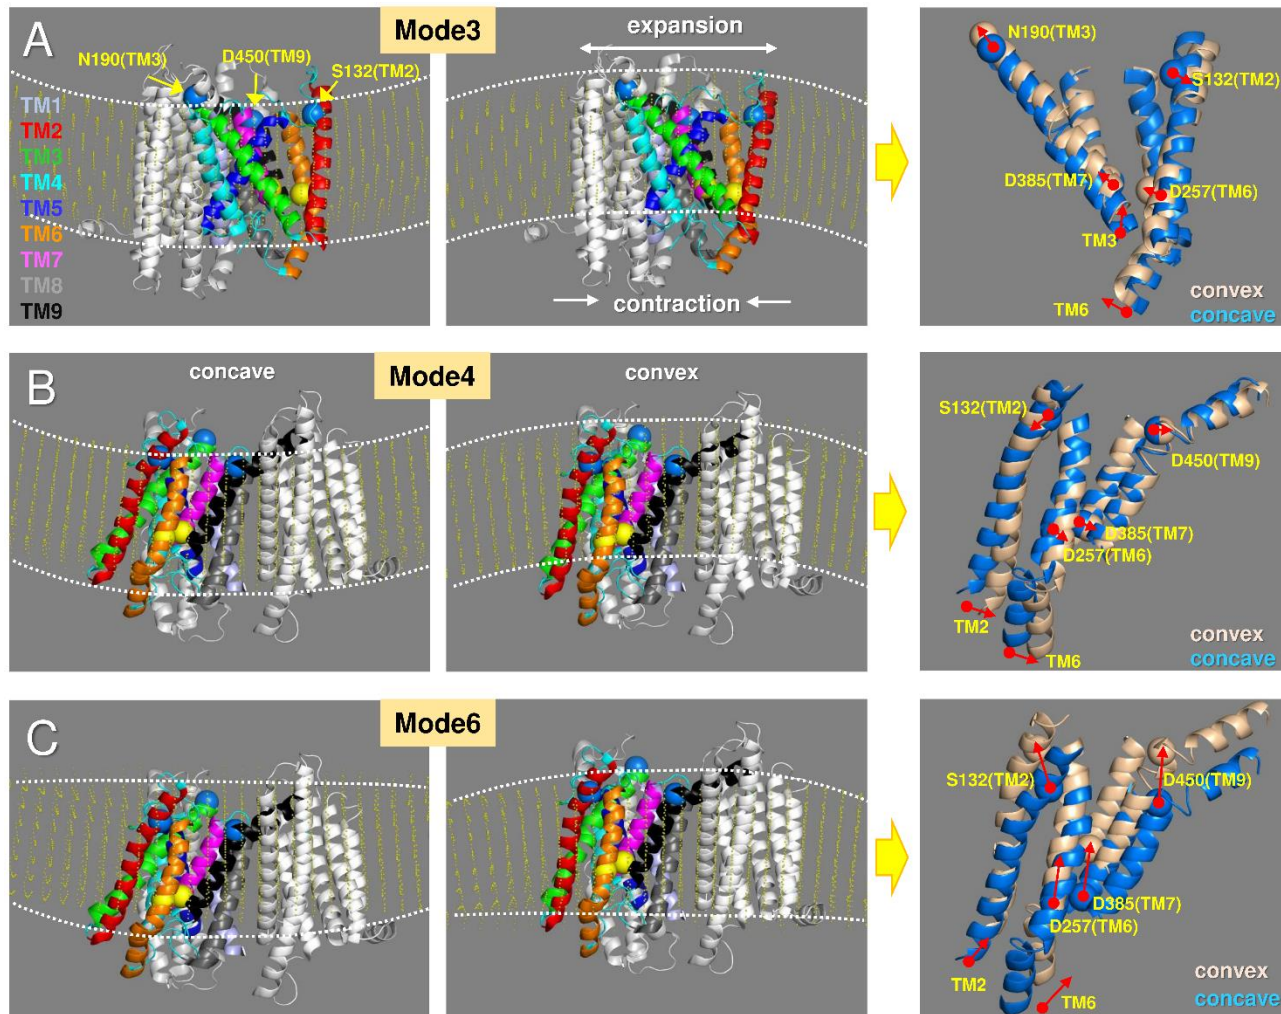

**Figure S6.** Motions of PS1 predicted by *membrANM* analysis of the intact protein. **(A-C)** Pair of conformers sampled during the motion of ANM modes 3, 4, and 6. Two ANM conformers which deviate by a preset RMSD of 4 Å from the initial structure are shown in each case. Modes 4 and 6 are shown from the same perspective; mode 3 is shown from a different perspective. We display APH-1 and PEN-2 in *silver*, the membrane in *yellow*, the PS1 TMs in different colors (NCT is not shown here). D257 and D385 in PS1 are shown in *yellow* spheres, S132 (TM2), N190 (TM3), and D450 (TM9) in *blue* spheres. On the *right* panels in each row, we display the superposition of the two conformers in different colors. For clarity, we included four TMs (TM2, TM3, TM6, and TM7 in mode 3 and TM2, TM6, TM7, and TM9 in modes 4 and 6). *Red arrows* indicate movements from concave to convex states for selected residues or TM helices. ANM mode 4 induces an opening at the EC-facing region but it is along an orthogonal radial direction such that it results in a change in TM2-TM9 distance. ANM mode 6 induces a vertical movement, in contrast to the previous two modes that induce radial displacements. We observe displacements in TM2, TM6 and TM9.

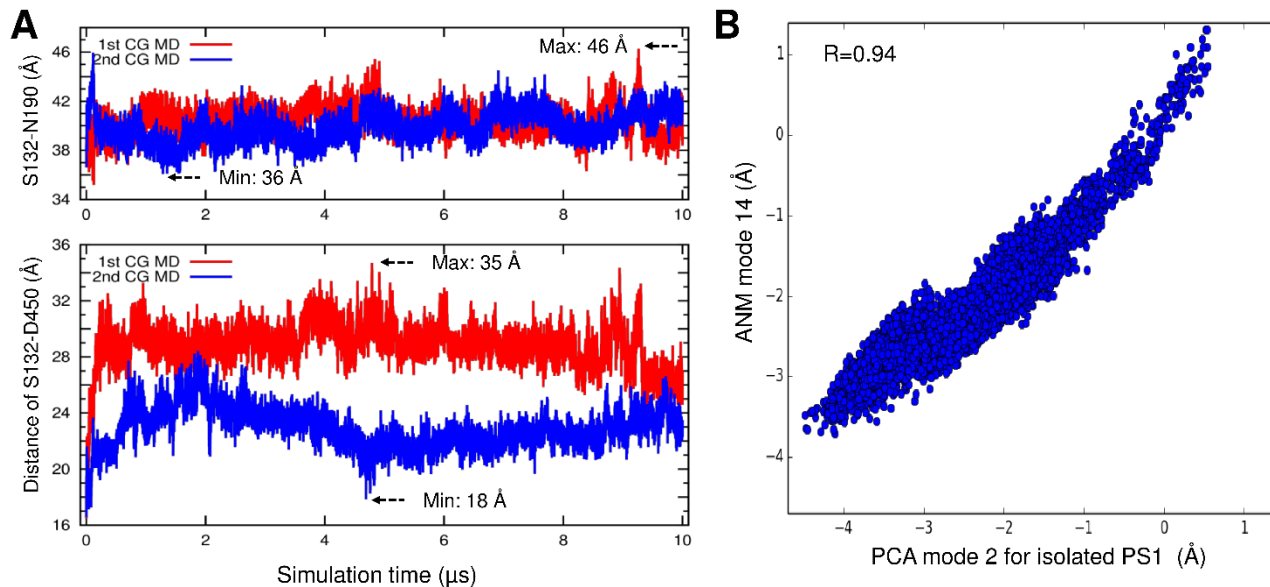

**Figure S7. Mobility of PS1 in CG MD simulations.** (A) Distances of the S132-N190 (*upper panel*) and S132-D450 (*lower panel*) are shown for two independent 10  $\mu$ s simulations. The distances of 1<sup>st</sup> and 2<sup>nd</sup> simulations are in *red* and *blue lines*, respectively. From the two simulations, the maximum and minimum distances were indicated with *arrows*. (B) Projections of the 10,000 frames from the 2<sup>nd</sup> 10  $\mu$ s trajectory onto the ANM mode 14 and PCA mode 2 directions.

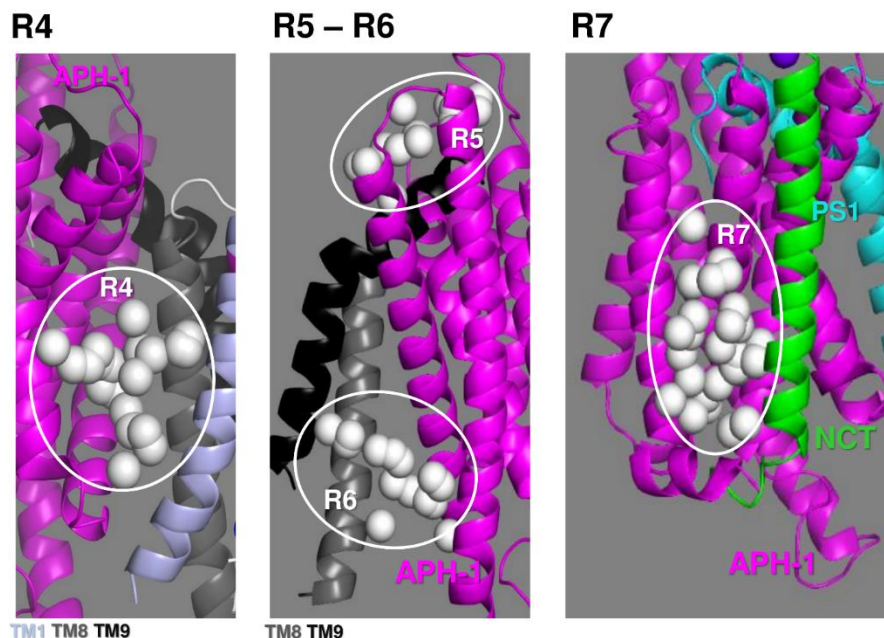

**Figure S8. Druggable sites identified at APH-1 interfacial regions.** Druggable regions R4-R7 were deduced from druggability simulations performed for the intact protein. White spheres are druggable hot spots, circled and labeled as R4-R7. R4-R6 are at the interface between PS1 and APH-1 (APH-1 is shown in *magenta* and TM helices in PS1 are colored as in **Fig. 9**). R7 is at the interface between APH-1 and NCT TM helix (*green*). Each panel shows the close vicinity of the druggable sites.

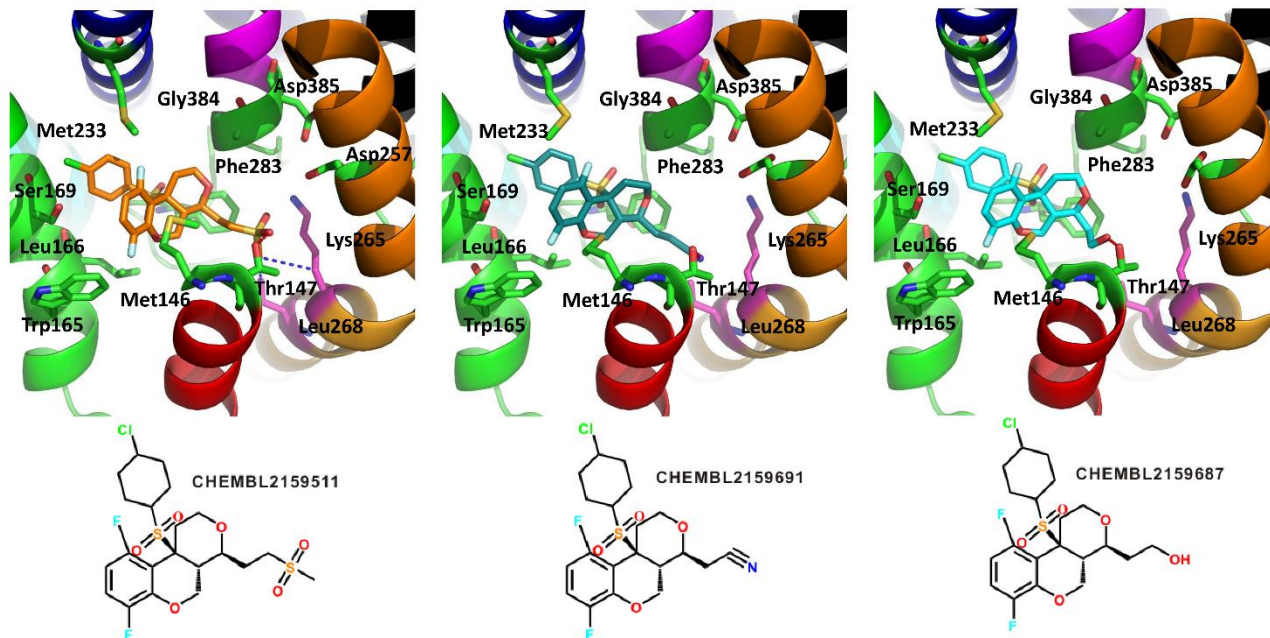

**Figure S9.** Detailed interactions between PS1 and three other drugs. Trp165, Leu166 and Met233 interact with the fluorine on the aromatic ring. Hydrophobic interactions take place between the Met146 and Phe283. Thr147 forms a hydrogen bond with (methylsulfonyl)ethane, acetonitrile, and ethanol, respectively.

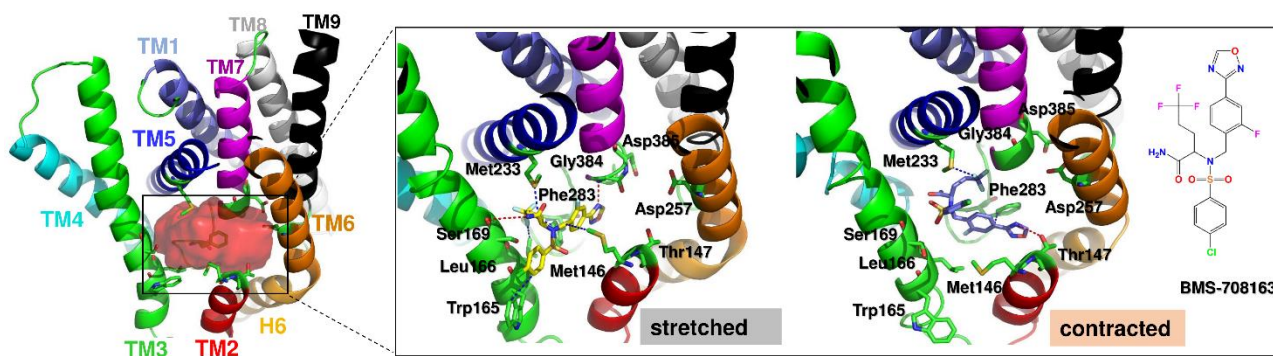

**Figure S10.** Dependency of the interactions between PS1 and its inhibitor (BMS-708163) on structural changes driven by ANM mode 4. The inhibitor binds to the orthosteric site (site R1 in Fig. 9A). Binding poses to the stretched and contracted forms are shown. The inhibitor shows a higher affinity to bind the stretched conformer.

# Supplemental Tables

**Table S1. Intersubunit distances between NCT and PS1 HL1 residue pairs that undergo intersubunit contacts facilitated by the global bending mode of the complex (\*)**

| A                                                                                                       |        |        |            | B                                   |        |     |        | C                                                                                                       |       |        |            | D                                   |        |     |        |     |       |
|---------------------------------------------------------------------------------------------------------|--------|--------|------------|-------------------------------------|--------|-----|--------|---------------------------------------------------------------------------------------------------------|-------|--------|------------|-------------------------------------|--------|-----|--------|-----|-------|
| Mode 1: C <sup>α</sup> -C <sup>α</sup> distances (Å) between NCT and PS1 (closed state distances < 9 Å) |        |        |            | Atomic interactions closer than 4 Å |        |     |        | Mode 7: C <sup>α</sup> -C <sup>α</sup> distances (Å) between NCT and PS1 (closed state distances < 9 Å) |       |        |            | Atomic interactions closer than 4 Å |        |     |        |     |       |
| NCT                                                                                                     | PS1    | closed | open (PDB) |                                     |        |     |        | NCT                                                                                                     | PS1   | closed | open (PDB) |                                     |        |     |        |     |       |
| ASP541                                                                                                  | THR122 | 3.908  | 15.077     |                                     | ASP541 | CA  | THR122 | OG1                                                                                                     | 3.825 |        |            |                                     | ARG583 | CD  | THR119 | OG1 | 3.189 |
| ASP541                                                                                                  | ASP121 | 5.257  | 16.886     | →                                   | ASP541 | N   | THR122 | OG1                                                                                                     | 3.631 |        |            |                                     | ARG583 | CD  | THR119 | O   | 3.644 |
| GLN540                                                                                                  | THR122 | 5.350  | 16.531     |                                     | ASP541 | CA  | ASP121 | C                                                                                                       | 3.973 |        |            |                                     | ARG583 | CZ  | THR119 | OG1 | 2.904 |
| ARG543                                                                                                  | THR122 | 6.861  | 18.243     |                                     | ASP541 | CA  | ASP121 | O                                                                                                       | 3.643 |        |            |                                     | ARG583 | NE  | THR119 | OG1 | 2.969 |
| ASP541                                                                                                  | GLU123 | 6.880  | 17.275     |                                     | ASP541 | CB  | ASP121 | O                                                                                                       | 3.716 |        |            |                                     | ARG583 | NH1 | THR119 | OG1 | 3.107 |
| LEU542                                                                                                  | THR122 | 7.073  | 18.154     |                                     | ASP541 | O   | ASP121 | O                                                                                                       | 3.579 |        |            |                                     | ARG583 | NH2 | THR119 | OG1 | 3.430 |
| SER544                                                                                                  | THR122 | 7.283  | 17.290     |                                     | GLN540 | CA  | THR122 | OG1                                                                                                     | 3.969 |        |            |                                     | ASP615 | CA  | GLU123 | OE2 | 3.733 |
| GLN540                                                                                                  | ASP121 | 7.565  | 18.775     |                                     | GLN540 | CB  | THR122 | OG1                                                                                                     | 3.948 |        |            |                                     | ASP615 | C   | GLU123 | OE2 | 3.603 |
| SER544                                                                                                  | GLU123 | 8.125  | 18.534     |                                     | GLN540 | CD  | THR122 | OG1                                                                                                     | 3.196 |        |            |                                     | ASP615 | CB  | GLU123 | CG  | 3.980 |
| GLN540                                                                                                  | GLU123 | 8.324  | 18.860     |                                     | GLN540 | CG  | THR122 | OG1                                                                                                     | 3.104 |        |            |                                     | ASP615 | CB  | GLU123 | OE2 | 3.394 |
| ASP541                                                                                                  | GLU120 | 8.369  | 18.871     |                                     | GLN540 | C   | THR122 | OG1                                                                                                     | 3.116 |        |            |                                     | ASP615 | CG  | GLU123 | OE2 | 3.943 |
| ARG539                                                                                                  | THR122 | 8.697  | 19.720     |                                     | GLN540 | NE2 | THR122 | OG1                                                                                                     | 3.791 |        |            |                                     | ASP541 | CA  | ARG108 | NH2 | 3.869 |
| ARG543                                                                                                  | GLU123 | 8.901  | 19.927     |                                     | GLN540 | OE1 | THR122 | CG2                                                                                                     | 3.800 |        |            |                                     | ASP541 | C   | ARG108 | NH2 | 3.823 |
| GLN540                                                                                                  | THR124 | 8.970  | 20.558     |                                     | GLN540 | OE1 | THR122 | OG1                                                                                                     | 3.488 |        |            |                                     | ASP541 | CB  | ARG108 | NH2 | 3.461 |
|                                                                                                         |        |        |            |                                     | GLN540 | O   | THR122 | CA                                                                                                      | 3.783 |        |            |                                     | ASP541 | CG  | ARG108 | CZ  | 3.573 |
|                                                                                                         |        |        |            |                                     | GLN540 | O   | THR122 | CB                                                                                                      | 3.338 |        |            |                                     | ASP541 | CG  | ARG108 | NE  | 3.290 |
|                                                                                                         |        |        |            |                                     | GLN540 | O   | THR122 | CG2                                                                                                     | 3.135 |        |            |                                     | ASP541 | CG  | ARG108 | NH2 | 2.969 |
|                                                                                                         |        |        |            |                                     | GLN540 | O   | THR122 | OG1                                                                                                     | 2.659 |        |            |                                     | ASP541 | O   | ARG108 | NH2 | 3.037 |
|                                                                                                         |        |        |            |                                     |        |     |        |                                                                                                         |       |        |            |                                     | ASP541 | OD1 | ARG108 | CZ  | 3.334 |
|                                                                                                         |        |        |            |                                     | ARG543 | CZ  | THR122 | CG2                                                                                                     | 3.821 |        |            |                                     | ASP541 | OD1 | ARG108 | NE  | 2.906 |
|                                                                                                         |        |        |            |                                     | ARG543 | NE  | THR122 | CG2                                                                                                     | 3.473 |        |            |                                     | ASP541 | OD1 | ARG108 | NH2 | 2.906 |
|                                                                                                         |        |        |            |                                     | ARG543 | NH2 | THR122 | CG2                                                                                                     | 3.402 |        |            |                                     | ASP541 | OD2 | ARG108 | CB  | 3.932 |
|                                                                                                         |        |        |            |                                     | ARG543 | NH2 | THR122 | O                                                                                                       | 3.774 |        |            |                                     | ASP541 | OD2 | ARG108 | CZ  | 3.521 |
|                                                                                                         |        |        |            |                                     |        |     |        |                                                                                                         |       |        |            |                                     | ASP541 | OD2 | ARG108 | NE  | 3.090 |
|                                                                                                         |        |        |            |                                     |        |     |        |                                                                                                         |       |        |            |                                     | ASP541 | OD2 | ARG108 | NH2 | 3.219 |
|                                                                                                         |        |        |            |                                     |        |     |        |                                                                                                         |       |        |            |                                     | GLU584 | CG  | PRO117 | O   | 3.777 |
|                                                                                                         |        |        |            |                                     |        |     |        |                                                                                                         |       |        |            |                                     | GLU584 | N   | PRO117 | O   | 3.772 |
|                                                                                                         |        |        |            |                                     |        |     |        |                                                                                                         |       |        |            |                                     | ARG616 | CA  | GLU123 | OE2 | 3.476 |
|                                                                                                         |        |        |            |                                     |        |     |        |                                                                                                         |       |        |            |                                     | ARG616 | C   | GLU123 | CB  | 3.986 |
|                                                                                                         |        |        |            |                                     |        |     |        |                                                                                                         |       |        |            |                                     | ARG616 | C   | GLU123 | CD  | 3.645 |
|                                                                                                         |        |        |            |                                     |        |     |        |                                                                                                         |       |        |            |                                     | ARG616 | C   | GLU123 | OE1 | 3.913 |
|                                                                                                         |        |        |            |                                     |        |     |        |                                                                                                         |       |        |            |                                     | ARG616 | C   | GLU123 | OE2 | 3.482 |
|                                                                                                         |        |        |            |                                     |        |     |        |                                                                                                         |       |        |            |                                     | ARG616 | N   | GLU123 | CD  | 3.611 |
|                                                                                                         |        |        |            |                                     |        |     |        |                                                                                                         |       |        |            |                                     | ARG616 | N   | GLU123 | OE2 | 2.667 |
|                                                                                                         |        |        |            |                                     |        |     |        |                                                                                                         |       |        |            |                                     | ARG616 | O   | GLU123 | CB  | 3.014 |
|                                                                                                         |        |        |            |                                     |        |     |        |                                                                                                         |       |        |            |                                     | ARG616 | O   | GLU123 | CD  | 3.457 |
|                                                                                                         |        |        |            |                                     |        |     |        |                                                                                                         |       |        |            |                                     | ARG616 | O   | GLU123 | CG  | 3.761 |
|                                                                                                         |        |        |            |                                     |        |     |        |                                                                                                         |       |        |            |                                     | ARG616 | O   | GLU123 | OE1 | 3.847 |
|                                                                                                         |        |        |            |                                     |        |     |        |                                                                                                         |       |        |            |                                     | ARG616 | O   | GLU123 | OE2 | 3.583 |

(\*) C<sup>α</sup>-C<sup>α</sup> distances refer to the closed state of the complex reached via the bending modes 1 and 7 based on an RMSD of 4 Å from the initial structure. Residue pairs coming into close proximity (< 9 Å) are listed for mode 1 (in A) and mode 7 (C). The last column in A and C lists the C<sup>α</sup>-C<sup>α</sup> distances in initial PDB structure. Among those residue pairs, those making atom-atom contacts within 4 Å are listed in parts B and D. See also Figs. 5 and S4.

**Table S2.** Summary of results from druggability simulations (\*)

| PS1                         |                 |               | PS1 & APH-1                |                 |               | APH-1 & NCT (TM)         |                 |               |
|-----------------------------|-----------------|---------------|----------------------------|-----------------|---------------|--------------------------|-----------------|---------------|
|                             | run             | kcal/mol      |                            | run             | kcal/mol      |                          | run             | kcal/mol      |
| <b>R1: Catalytic cavity</b> |                 |               | <b>R4: TM1-TM8 (APH-1)</b> |                 |               | <b>R7: APH-1, NCT-TM</b> |                 |               |
| Intact                      | 1 <sup>st</sup> | -12.21        | Intact                     | 1 <sup>st</sup> | -12.48        | Intact                   | 1 <sup>st</sup> | -13.01        |
| Intact                      | 2 <sup>nd</sup> | -12.68        | Intact                     | 2 <sup>nd</sup> | -12.82        | Intact                   | 2 <sup>nd</sup> | -13.44        |
| Intact                      | 3 <sup>rd</sup> | -12.36        | Intact                     | 3 <sup>rd</sup> | -12.99        | Intact                   | 3 <sup>rd</sup> | -13.36        |
| PS1                         | 1 <sup>st</sup> | -13.67        | PS1                        | 1 <sup>st</sup> | -8.87         | AVG                      | all             | -13.27 ± 0.26 |
| PS1                         | 2 <sup>nd</sup> | -13.44        | PS1                        | 5 <sup>th</sup> | -10.68        |                          |                 |               |
| PS1                         | 3 <sup>rd</sup> | -14.36        | AVG                        | all             | -11.57 ± 2.70 |                          |                 |               |
| PS1                         | 4 <sup>th</sup> | -11.57        | <b>R5: TM9 top (APH-1)</b> |                 |               |                          |                 |               |
| PS1                         | 5 <sup>th</sup> | -13.63        | intact                     | 1 <sup>st</sup> | -9.08         |                          |                 |               |
| AVG                         | all             | -12.99 ± 1.42 | intact                     | 2 <sup>nd</sup> | -9.22         |                          |                 |               |
| <b>R2: Allosteric site</b>  |                 |               | PS1                        | 4 <sup>th</sup> | -9.94         |                          |                 |               |
| Intact                      | 2 <sup>nd</sup> | -11.84        | AVG                        | all             | -9.41 ± 0.53  |                          |                 |               |
| Intact                      | 3 <sup>rd</sup> | -9.93         | <b>R6: TM8-TM9 (APH-1)</b> |                 |               |                          |                 |               |
| PS1                         | 1 <sup>st</sup> | -9.74         | Intact                     | 2 <sup>nd</sup> | -11.76        |                          |                 |               |
| PS1                         | 4 <sup>th</sup> | -9.73         | Intact                     | 3 <sup>rd</sup> | -12.13        |                          |                 |               |
| PS1                         | 5 <sup>th</sup> | -9.49         | AVG                        | all             | -11.95 ± 0.19 |                          |                 |               |
| AVG                         | all             | -10.15 ± 1.69 |                            |                 |               |                          |                 |               |
| <b>R3: TM2-TM6-TM9</b>      |                 |               |                            |                 |               |                          |                 |               |
| intact                      | 1 <sup>st</sup> | -10.01        |                            |                 |               |                          |                 |               |
| intact                      | 2 <sup>nd</sup> | -9.90         |                            |                 |               |                          |                 |               |
| intact                      | 3 <sup>rd</sup> | -12.29        |                            |                 |               |                          |                 |               |
| PS1                         | 1 <sup>st</sup> | -11.32        |                            |                 |               |                          |                 |               |
| PS1                         | 2 <sup>nd</sup> | -11.05        |                            |                 |               |                          |                 |               |
| PS1                         | 3 <sup>rd</sup> | -11.17        |                            |                 |               |                          |                 |               |
| PS1                         | 4 <sup>th</sup> | -10.62        |                            |                 |               |                          |                 |               |
| PS1                         | 5 <sup>th</sup> | -10.78        |                            |                 |               |                          |                 |               |
| AVG                         | all             | -10.89 ± 1.40 |                            |                 |               |                          |                 |               |

  

| NCT                         |        |          |
|-----------------------------|--------|----------|
|                             | Region | kcal/mol |
| <b>NCT: Region RA to RE</b> |        |          |
| intact                      | RA     | -10.37   |
| Intact                      | RB     | -9.57    |
| intact                      | RC     | -8.45    |
| intact                      | RD     | -8.17    |
| intact                      | RE     | -8.14    |

(\*) Two sets of simulations were performed: (i) a set of 5 independent runs with only PS1 (called PS1 1<sup>st</sup> – 5<sup>th</sup>), and (ii) a set of 3 independent runs for the intact protein (called intact 1<sup>st</sup> – 3<sup>rd</sup>). The druggable sites are organized by the corresponding subunits. No druggable sites were detected on PEN2. The third column in each case lists the binding free energies. Simulations yielded 6 druggable sites (R1-R6) on PS1 (Figs. 9A-B and S8) including three (R4-R6) at the interface between PS1 and APH-1; one (R7) on APH-1 at the interface with the IC terminal helix of NCT (Fig. S8), and five sites on the EC subunit NCT, designated as RA - RE (Fig. 9C).
