# Supplementary material
Source: PubMed Central journal article supplement (PMC5770568)
Supplement: mmc5.pdf [file mmc5.pdf]

# Allosteric Modulation of Intact $\gamma$ -Secretase Structural Dynamics

Ji Young Lee,<sup>1,3</sup> Zhiwei Feng,<sup>2,3</sup> Xiang-Qun Xie,<sup>2,3,\*</sup> and Ivet Bahar<sup>1,3,\*</sup>

<sup>1</sup>Department of Computational and Systems Biology, School of Medicine, <sup>2</sup>Department of Pharmaceutical Sciences and Computational Chemical Genomics Screening Center, School of Pharmacy, and <sup>3</sup>NIH Center of Excellence for Computational Drug Abuse Research, University of Pittsburgh, Pittsburgh, Pennsylvania

**ABSTRACT** As a protease complex involved in the cleavage of amyloid precursor proteins that lead to the formation of amyloid  $\beta$  fibrils implicated in Alzheimer's disease,  $\gamma$ -secretase is an important target for developing therapeutics against Alzheimer's disease.  $\gamma$ -secretase is composed of four subunits: nicastrin (NCT) in the extracellular (EC) domain, presenilin-1 (PS1), anterior pharynx defective 1, and presenilin enhancer 2 in the transmembrane (TM) domain. NCT and PS1 play important roles in binding amyloid  $\beta$  precursor proteins and modulating PS1 catalytic activity. Yet, the molecular mechanisms of coupling between substrate/modulator binding and catalytic activity remain to be elucidated. Recent determination of intact human  $\gamma$ -secretase cryo-electron microscopy structure has opened the way for a detailed investigation of the structural dynamics of this complex. Our analysis, based on a membrane-coupled anisotropic network model, reveals two types of NCT motions, bending and twisting, with respect to PS1. These underlie the fluctuations between the "open" and "closed" states of the lid-like NCT with respect to a hydrophilic loop 1 (HL1) on PS1, thus allowing or blocking access of the substrate peptide (EC portion) to HL1 and to the neighboring helix TM2. In addition to this alternating access mechanism, fluctuations in the volume of the PS1 central cavity facilitate the exposure of the catalytic site for substrate cleavage. Druggability simulations show that  $\gamma$ -secretase presents several hot spots for either orthosteric or allosteric inhibition of catalytic activity, consistent with experimental data. In particular, a hinge region at the interface between the EC and TM domains, near the interlobe groove of NCT, emerges as an allo-targeting site that would impact the coupling between HL1/TM2 and the catalytic pocket, opening, to our knowledge, new avenues for structure-based design of novel allosteric modulators of  $\gamma$ -secretase protease activity.

## INTRODUCTION

The  $\gamma$ -secretase complex is a membrane protease involved in the proteolytic cleavage of a range of substrates (1–3), including the amyloid precursor protein (APP) and the Notch protein (2). Amyloidogenic APP cleavages by  $\beta$ - and  $\gamma$ -secretases generate amyloid  $\beta$  ( $A\beta$ ) peptides, which oligomerize and form the  $A\beta$  plaques leading to Alzheimer's disease (AD) pathology (1). Because of this pathogenic effect,  $\gamma$ -secretase has been a target for the development of drugs against AD (4).

The  $\gamma$ -secretase complex is composed of four subunits/proteins: presenilin-1 (PS1) (5), nicastrin (NCT), anterior pharynx defective 1 (APH-1), and presenilin enhancer 2 (PEN-2) (6,7) (Fig. 1, A and B). PS1 serves as the catalytic core (8–10). Fig. 1 C displays the catalytic residues

Asp257 and Asp385, along with the nearby residues (Met146, Trp165, Met233, and Gly384) that coordinate the inhibitor, DAPT, observed in cryo-electron microscopy (11). Cleavage of substrate (99 residue C-terminal fragment of the APP) by PS1 proceeds in two steps (12):  $\epsilon$ -cleavage (endopeptidase activity), followed by  $\gamma$ -cleavage (carboxypeptidase activity) to release the  $A\beta$  peptide to the extracellular (EC) medium. PS1 is composed of nine transmembrane (TM) helices, TM1–TM9 (Fig. 1 C). Many mutations implicated in the formation of  $A\beta$ , including 90% of familial AD mutations, are located in PS1 (2,13–16). NCT forms the EC domain, except for its C-terminal helix, which inserts into the membrane. It is composed of two lobes, large and small (LL and SL). Glu333 near the interlobe interface, and the nearby DYIGS motif D336–S340, have been pointed out to be involved in substrate binding (17–19) (Fig. 1 B). PEN-2 helps stabilize the complex (20). APH-1 has seven TM helices; it plays an essential role in Notch signaling and aids in the assembly of premature components (21).

Submitted June 6, 2017, and accepted for publication October 10, 2017.

\*Correspondence: bahar@pitt.edu or xix15@pitt.edu

Ji Young Lee and Zhiwei Feng contributed equally to this work.

Editor: Michael Feig.

<https://doi.org/10.1016/j.bpj.2017.10.012>

© 2017 Biophysical Society.

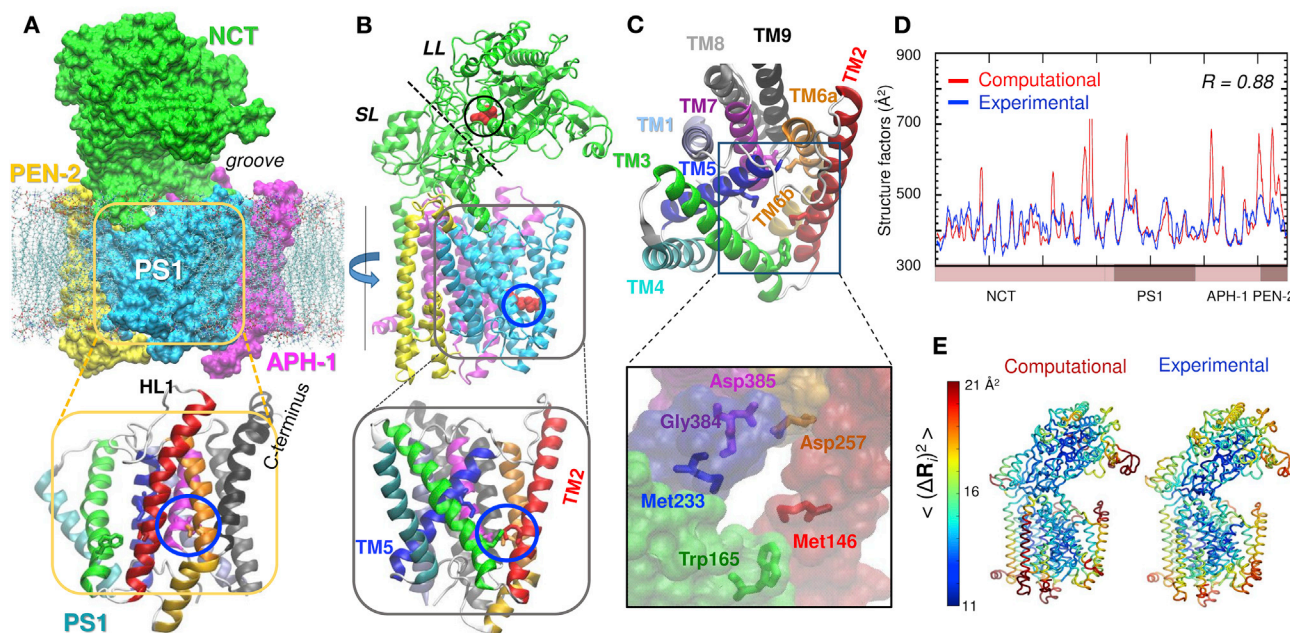

**FIGURE 1** Structure of  $\gamma$ -secretase, its catalytic cavity, and equilibrium fluctuations. (A)  $\gamma$ -secretase in a lipid bilayer, constructed using the coordinate data in PDB: 5FN2 (11) and the lipid molecules from the Orientations of Proteins in Membranes database. The complex is composed of four subunits shown in different colors (PS1, NCT, APH-1, and PEN-2). NCT forms the ectodomain (except for its C-terminal helix, residues 665–698); the other three subunits form the TMD. The lipid bilayer is shown as gray sticks, with the polar heads in red. The lower diagram shows the nine TM helices of PS1 color-coded as in (C), with the catalytic site enclosed in a blue circle. The hydrophilic loop HL1 connecting TM1 and TM2 is labeled. (B) Ribbon diagram of the complex shown upon rotating the structure in (A) by 90°. Glu333, near the substrate-binding site of NCT, is shown in red, enclosed in a black circle; the catalytic site of PS1 is enclosed in a blue circle. The dashed line on NCT separates the large lobe (LL) and small lobe (SL), which form a large surface groove. (C) Top view of PS1. The lower diagram shows the catalytic residues Asp257 and Asp385, and neighboring Met146, Trp165, Met233, and Gly384 (TM helices colored as in top ribbon diagram). (D) Comparison of experimentally observed (blue) and computationally predicted (red) structure factors for the complex resolved by cryo-electron microscopy. The correlation coefficient between the two sets of data is 0.88. (E) Same comparison as in D, in terms of ribbon diagrams color-coded by residue MSFs from experiments and ANM computations.

Targeting  $\gamma$ -secretase for AD therapy requires the development of a compound that would inhibit the production of  $A\beta$  (especially  $A\beta_{42}$ ), which can also maintain the interactions with other substrates (2). Although a number of  $\gamma$ -secretase inhibitors have been developed and tested in humans with both AD and cancer, harmful side effects associated with blocking the Notch signaling pathway have been reported (2,22). This motivated the development of  $\gamma$ -secretase modulators (GSMs) for the treatment of AD (23). Earlier studies have also pointed to the roles of  $\gamma$ -secretase-associated proteins (24), and to allosteric sites located within PS1 (25–27). Clinical trials have been initiated for a GSM, E2012, which reduces the production of  $A\beta$  without interfering with Notch signaling (23,28).

The active site of PS1 is located at the interior of its TM horseshoe-like fold (29) (Fig. 1). TM2 and TM6 serve as “doors” for substrate entry (30), as also observed in recent molecular dynamics (MD) simulations of the PS1 subunit (31). Recent coarse-grained (CG) and atomic simulations also showed that an extended surface covering TM2, TM6, TM9, and the C-terminal PAL motif, was involved in binding the APP at TM domain (TMD) (32). The similar microsecond simulations of Aguayo-Ortiz et al. (33) also showed that the same three helices, plus TM7, were concert-

edly involved in the transition of PS1 between active and inactive states (coupled to the protonation of Asp257 and Asp385), but these movements were not correlated with those involved in substrate recognition. Earlier studies have drawn attention to the EC-exposed parts of hydrophilic loop 1 (HL1) (S104–T124), to TM5 (L219–L241), and to the C-terminal fragment of PS1 near HL1/TM2 as sites involved in APP binding (12,34,35), and substrate binding to these regions has been proposed to induce structural changes that enable PS1 catalytic activity (12). Thus, conflicting findings on the type of, or even existence of, couplings between the conformational changes of PS1 involved in substrate binding and those involved in catalytic activity have been reported. The mechanism of modulation of activity by GSMs has also not been resolved. HL1/TM2 with TM5 were reported to form a pocket for phenylimidazole-type GSM binding (35), but how modulator binding would interfere with the activity at a catalytic pocket  $> 30$  Å away remains unclear. Bai et al. (29) suggested that the distance between the binding sites on NCT and PS1 could be shortened upon rotation of NCT, and Xie et al. (36) suggested that rotation of NCT LL relative to SL might expose a substrate-binding site in NCT that is otherwise buried by an exposed loop (C140–L167). Other studies point to the

role of NCT conformational dynamics (37,38), or its role as a gatekeeper for substrate binding or excluding larger substrates (39), whereas earlier studies questioned the NCT-substrate-binding ability (40) and the role of Glu333 in NCT (41).

Here, we examine the structural dynamics of intact  $\gamma$ -secretase using the anisotropic network model (ANM) (42,43), with the goal of elucidating the collective mechanisms of motions intrinsically favored by the intact quaternary structure, and identifying potential sites for allosteric modulation of its APP binding properties. Allosteric modulation, or allo-targeting, has emerged as a rational strategy for selectively interfering with specific interactions involved in particular pathways, although retaining their catalytic activity (44–46). Even though the  $\gamma$ -secretase complex has been resolved at relatively low resolutions by cryo-electron microscopy (4.5 Å in 2014 (47), 4.0–4.3 Å (11), and 3.4 Å in 2015 (29)), ANM analysis can advantageously use the low-resolution data to generate a unique and robust solution for the global dynamics of the quaternary structure, as proven in numerous applications (to other systems) and comparisons with experimental data (48–51). Here, we first characterize the mechanism of couplings between the subunits (and surrounding membrane) and identify key sites (e.g., global hinges) that control the overall mechanics of the complex using the ANM. The validity of ANM results is verified by CG MD simulations, where applicable. Then, we perform druggability simulations (52), which are particularly useful for identifying allosteric sites (53,54), and determine the hot spots, either orthosteric or allosteric, that can potentially bind modulators of allosteric dynamics. The integrated analysis of the two sets of data using the ProDy interface (55,56) opens, to our knowledge, new avenues for the rational design of allosteric modulators of  $\gamma$ -secretase.

## METHODS

### ANM for membrane proteins

The ANM (42,43) represents the protein as an elastic network where each  $C^\alpha$  atom is a node, and node pairs within a cutoff distance (of 15 Å) are connected by elastic springs of uniform force constant  $\gamma$ . The overall potential  $V$  of the system is a summation over the harmonic potentials of all springs. The second derivative of  $V$  with respect to residue movements yields a closed form expression for the ANM Hessian matrix  $\mathbf{H}$ . Eigenvalue decomposition of  $\mathbf{H}$  yields 3N-6 nonzero eigenvalues  $\lambda_k$  and corresponding eigenvectors  $\mathbf{u}_k$ , which define the frequencies and shapes of the ANM (normal) modes uniquely accessible to the structure. The size of motion along mode  $k$  is proportional to  $(1/\lambda_k)^{1/2}$ , i.e., lower modes, also called softer modes, make larger contributions to overall structural change (see Fig. S1), e.g., the contributions of ANM modes 1 and 2 were 0.12 and 0.06, respectively, summing up to a total of 0.18. The extension to membrane proteins (membrANM) (57) permits the incorporation of the effect of the lipid bilayer (environment) on the system (the  $\gamma$ -secretase complex) dynamics. The TM horseshoe-like structure of the TMD creates a hollow region exposed to membrane, hence the importance of using membrANM. The membrane is constructed using a face-centered cubic lattice with a circular

shape, the thickness and position of which are obtained from the Orientations of Proteins in Membranes database (58). Computations were performed using the ProDy application programming interface (55,56). ANM predicts the direction of motion along different modes, whereas the size of the motion is arbitrary (dependent on  $\gamma$ ). Here, ANM conformers along each mode were illustrated/visualized by adopting an root-mean-square-deviation (RMSD) of 4 Å with respect to the PDB structure. The corresponding interresidue distance changes were comparable to those observed in CG MD simulations. ANM conformers were mapped into full atomic representations using PULCHRA (59), succeeded by energy-minimization using NAMD (60).

CG MD simulations were performed using GROMACS v5.1.4 (61) with MARTINI 2.2 force field (62). The CG MD set up (protein embedded in the phosphatidylcholine bilayer) was generated using GHARMM-GUI MARTINI bilayer maker (63). The trajectories (or 10,000 frames per run) were subjected to principal component analysis (PCA) (55,64) using ProDy application programming interface (55,56). The contribution of principal components 1 and 2 (also called PCA modes 1 and 2) were 0.59 (0.51) and 0.14 (0.15), respectively, summing up to a total of 0.73 (0.66) for the first (second) run (see Fig. S1).

Druggability simulations, also called mixed-probe (65), cosolvent-based (66,67), or mixMD (54) simulations, were performed using the method described in our previous study (52), implemented in the DruGUI module of ProDy (55,56). The method has been benchmarked against several well-studied systems (52,68), such as murine double mutant-2, protein tyrosine phosphatase 1B, lymphocyte function-associated antigen 1, vertebrate kinesin-5, p38 mitogen-activated protein kinase, and cytochrome *c*. Mainly, a grid-based method is used and the binding free energy of probe molecules at each grid  $i$  is evaluated as  $\Delta G_i = -RT \ln(n_i/n_o)$ . Here,  $n_i/n_o$  is the ratio of the observed density of probes in MD simulations ( $n_i$ ) to the density in protein-free system ( $n_o$ ),  $R$  is the gas constant, and  $T$  is the absolute temperature (K). More details on this and other methods are presented in the Supporting Materials and Methods.

The PDB structure of  $\gamma$ -secretase (11) and its ANM-generated conformers were used as targets for docking of several inhibitors (DAPT, BMS-708163, ChEMBL2159511, ChEMBL2159687, and ChEMBL21596910) and GSMs (E2012 and ST1120) using Surflex-Dock (69), implemented in SYBYL-X 1.3, with the same protocol as reported in our previous studies (70–73).

Visualization of data was performed using ProDy NMWiz (55,56), VMD v1.9.1 (74), PyMOL v1.8.4.2 (75), and GnuPlot v4.6 (76).

## RESULTS

### NCT undergoes two types of *en bloc* movements with respect to the TMD: global bending and twisting

Fig. 1, *D* and *E* illustrate the comparison of the ANM-predicted mean-square fluctuations (MSFs) of residues,  $\langle(\Delta \mathbf{R}_i)^2\rangle$ , with the structure factors reported experimentally (11).  $\Delta \mathbf{R}_i$  denotes the change in the spatial position ( $\mathbf{R}_i$ ) of residue  $i$ . The correlation coefficient between the two sets is 0.88. Panel *E* provides an alternative comparison, with color-coded diagrams. These results show the excellent agreement between the ANM-predicted intrinsic dynamics of the  $\gamma$ -secretase complex in the absence of membrane and that observed in the cryo-electron microscopy environment.

Next, we examined the collective movements of the complex in the lipid bilayer. We focused on the collective movements driven by the lowest frequency modes, which usually

provide information on cooperative events relevant to functional mechanisms (48–51). Our membrANM analysis clearly showed that a major mechanism of collective motion encoded by the structure is the reorientation of NCT with respect to PS1, via two types of reconfiguration: bending and twisting, illustrated in Fig. 2. Each panel in the figure displays a pair of alternative conformers differing by an RMSD of 4 Å with respect to the original structure, sampled during the fluctuations along the indicated soft (most easily accessible) modes. See also Movies S1 and S2 for the collective motions driven by the two softest modes. During bending movements (Fig. 2, A and B; Movie S1), the NCT LL moves up and down above the EC-facing vestibule of PS1, and during the twisting motion (Fig. 2, C and D; Movie S2) it cooperatively rotates back and forth about the normal to the plane of the membrane. NCT thus acts as a lid on the EC-facing vestibule of PS1; its movements give rise to open or closed conformers of the large surface groove, which alternately expose or cover the EC-exposed vestibule of PS1, as indicated by distance changes between selected residues.

The validity of these two types of motion was further verified by two independent CG MD simulations of 10  $\mu$ s each. The simulations yielded MSF profiles in excellent agreement with ANM predictions (Figs. 3, B and C; S2, A and B). The distance changes between NCT and PS1 observed in CG MD (Fig. 3 A) confirmed that those listed for ANM conformers in Fig. 2, based on an RMSD of 4 Å from the initial structure, were reasonable approximations. Fig. S3 shows that the CG MD trajectories exhibited RMSDs of 8–11 Å during 10  $\mu$ s simulations. PCA of CG MD trajectories further confirmed that global bending and twisting of NCT were the most dominant modes of motion of the complex, as also reported in a recent study by Aguayo-Ortiz et al. (33). As shown in the mode-mode correlation map in Fig. 3 D,

PCA modes 1 and 2 (PCA1 and PCA2) exhibited a correlation coefficient of 0.86 each, with the respective ANM modes 1 and 2. Snapshots from the trajectories aligned along PCA1 yielded a correlation of 0.99 with their alignment along ANM mode 1; and that along PCA2, yielded a correlation of 0.81 with ANM mode 2 (Fig. 3 E). See similar results from CG MD run 2 in Fig. S2. Finally, we also analyzed five different structures resolved (11,29) for NCT and PS1. The MSF profile based on their structural covariance was found to be consistent with both ANM and CG MD profiles (see Figs. 3, B and C; S2, A and B).

### NCT lid-like movements accompanied by PS1 HL1 rearrangements modulate the exposure/covering of the PS1 vestibule

The lid-like motions of NCT suggest that this subunit may modulate the access or binding of ligands or drugs to the groove, and thereby to PS1. The distance changes between NCT and PS1 during these cooperative motions were indicated in Figs. 2 and 3. Two residue pairs were selected as references: 1) Glu333 in NCT near the groove, which has been proposed to serve as substrate recruitment pocket (19), and the PS1 catalytic residues Asp257/Asp385 (29); and 2) NCT Asp541 or Glu584, at the entrance of the groove, distinguished by their high mobility (see Fig. 4 A), and Tyr115 in PS1, which has been reported to bind a GSM (35). The former pair provides a measure of the overall distance between functional sites in the two subunits; the latter emphasizes the ability of selected functional sites to come into close proximity, thus allowing for a physical interaction between the two subunits near the known substrate- or GSM-binding regions. The accessibility of an ensemble of intersubunit distances favored by the intrinsic dynamics of the complex is

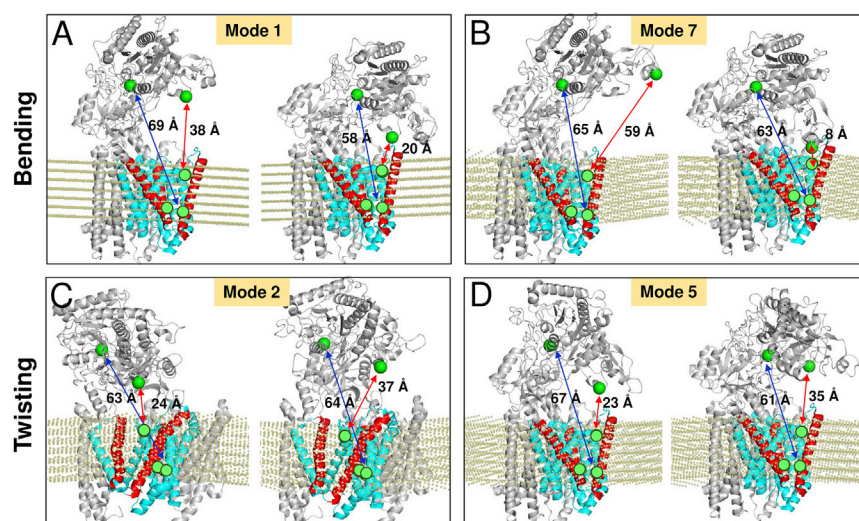

FIGURE 2 Bending and twisting motions of NCT with respect to TMD. (A–D) Pairs of conformers sampled during bending (modes 1 and 7) and twisting (modes 2 and 5) of  $\gamma$ -secretase. In each case, two ANM conformers are shown to illustrate the type of conformational fluctuations driven by the indicated mode. We display the membrane in yellow dots, PS1 in cyan, and PS1 TM2, TM3, and TM7 helices in red. The position of Glu333 in NCT, and Asp257 and Asp385 in PS1, are indicated by green spheres. Distances between Asp257 and Glu333 (blue arrow), Asp541 (NCT) and Tyr115 (PS1) (red arrows in A, C, and D), and Glu584 (NCT) and Tyr115 (PS1) (red arrows in B) are shown. Note that the distances depend on the size of ANM motions, which scale with the force constant  $\gamma$ . Here, the distances corresponding to an RMSD of 4 Å with respect to the original (PDB) structure are shown, for each mode direction. MD simulations (Fig. 3) indicated that such distance changes take place within microseconds. See Movies S1 and S2 for the animations of the respective modes 1 and 5.

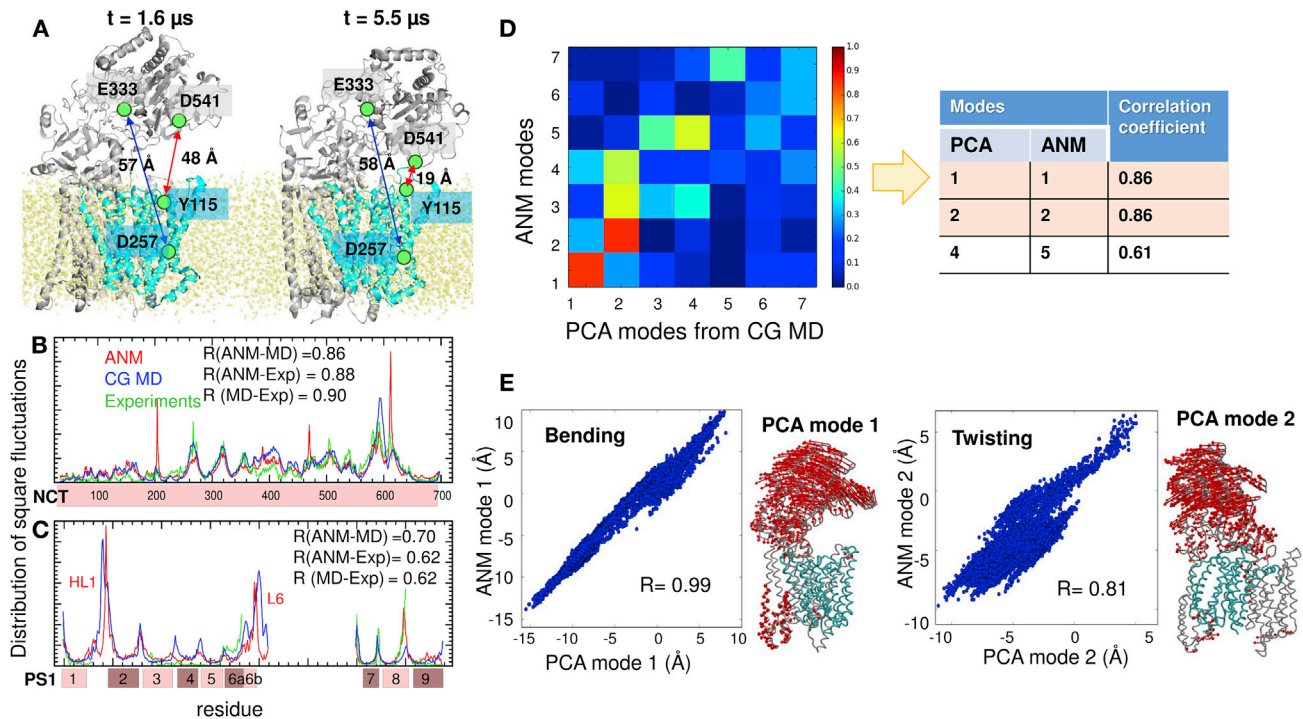

**FIGURE 3** Results from CG MD simulations of  $\gamma$ -secretase. (A) Motions of NCT with respect to PS1 (cyan). Two snapshots at  $t = 1.6$  and  $5.5 \mu\text{s}$  are displayed (from *run 1*). The distances between Asp257 and Glu333 (blue arrows) and Tyr115 and Asp541 (red arrows) are indicated. See Fig. S3 for more details. (B) Comparison of the MSF profile of NCT residues predicted by the ANM (red curve), observed in CG MD (blue), and deduced from ensemble analysis of five PDB structures (green). Correlations between the three pairs vary in the range 0.86–0.90, as indicated. (C) Same as (B), for PS1. (D) Correlations between the softest (seven) modes predicted by the ANM and those obtained from the PCA of 10  $\mu\text{s}$  MD trajectory (*run 1*). High correlations are shown in dark red and weak correlations in dark blue. The table lists the pairs that exhibit the highest correlations. (E) Projections of 10,000 frames from 10  $\mu\text{s}$  trajectory onto the ANM mode 1 and PCA mode 1 directions (left), and ANM mode 2 and PCA mode 2 directions (right). PCA mode 1 is equivalent to the bending (mode 1) predicted by ANM, as illustrated in the ribbon diagram, and PCA mode 2 is equivalent to the twisting mode (ANM mode 2). Similar results obtained in CG MD run 2 are presented in Fig. S2.

consistent with the ability of  $\gamma$ -secretase to catalyze the cleavage of substrates of various lengths (1–3,77,78), and the shifts in the sizes of A $\beta$  peptides caused by different modulators (22). Overall, these results suggest that these modes of motion favored by the quaternary architecture can be exploited for binding or accommodating various peptides or cleavage sites, and they modulate the protease activity by providing or hindering access to binding sites.

Minima in the MSF profile of the complex predicted in the presence of the lipid bilayer (Fig. 4 A) indicate the key regions that potentially act as hinges controlling the bending/torsion of NCT. Among minima, we note Phe287, which was suggested (29,36) to act as a hinge. Glu333 also exhibits small fluctuations, consistent with its stable positioning at the interface between anticorrelated lobes of NCT. In contrast, the NCT residues His610–T614 (peak at N612) show large movements distinguished by a sharp peak. These, and spatially neighboring residues (e.g., D541, R543, R583, E584, and P593) are all located at the “mouth” of the surface groove, enclosed by the white circle in Fig. 4 C. Fig. 4 B displays the MSF profile of PS1 residues. The highest peak in this case is at E120–T124. These, along with the charged residues R108, K109, and D110, take part in HL1 (S104–T124;

shown by red spheres in panels C and D), which connects TM1 and TM2. This loop covers the EC-facing vestibule of PS1 (as can be seen from the top view of the three TM subunits in Fig. 4 D). Its high mobility has been noted in an earlier study (31). Notably, several charged residues distinguished by their high mobility make intersubunit contacts (Figs. 5 and S4) during the cooperative bending of NCT to interact with the PS1 HL1 (see also Movie S1). Table S1 provides the list of intersubunit contacts made during these movements, including Q540 (NCT)–T122 (PS1), which can form a hydrogen bond driven by mode 1 (Fig. 5), or D541 (NCT)–R108 (PS1), which can form a salt bridge driven by mode 7 (Fig. S4).

The ability of HL1 to make conformational rearrangements and intersubunit interactions that can interfere with the access of the substrate (APP N-terminal segment) suggests that this region may serve as a target site for binding allosteric modulators of  $\gamma$ -secretase function. Y106/Y115 have indeed been reported to be GSM-binding residues (35). Druggability simulations below will show that this loop harbors a druggable site, in support of their significance for potential alteration of the  $\gamma$ -secretase substrate-binding properties.

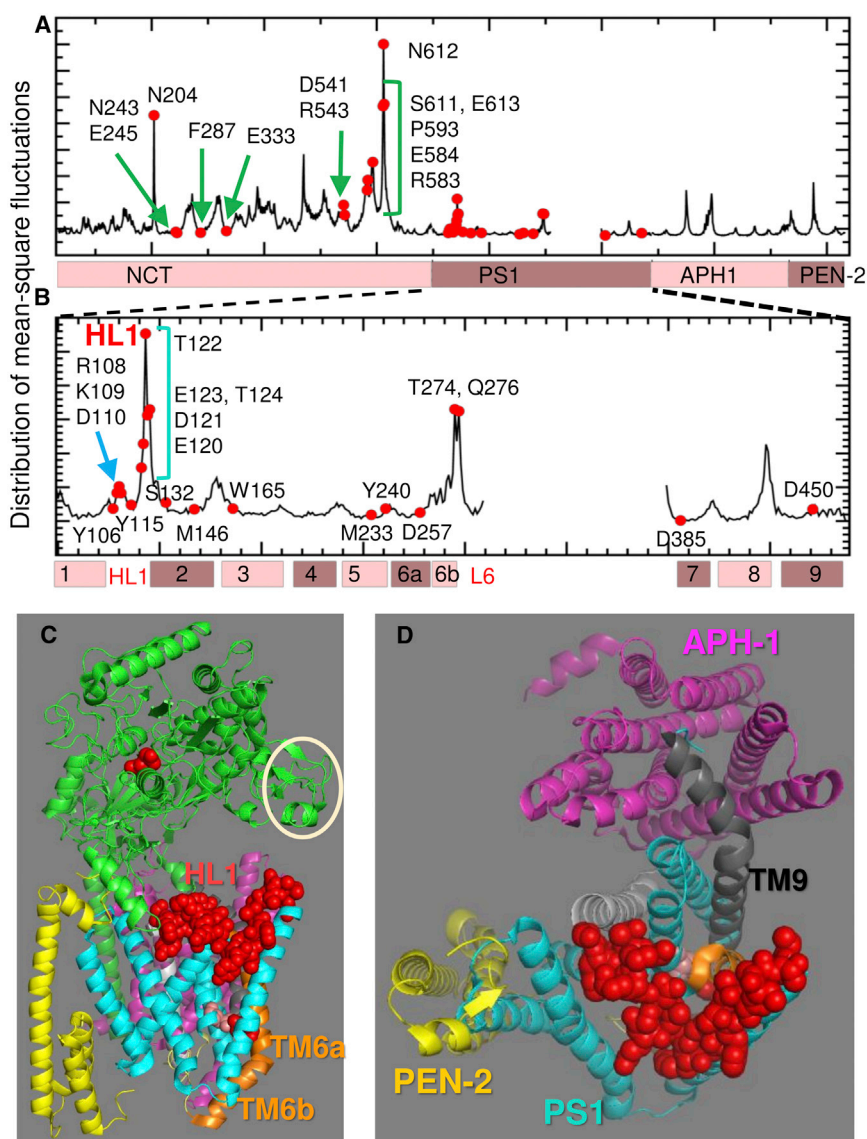

FIGURE 4 Mobility profile of  $\gamma$ -secretase and the critical position and dynamics of HL1. (A) Distribution of residue MSFs for the intact  $\gamma$ -secretase in the membrane (NCT portion identical to the ANM curve is shown in red in Fig. 3 B). Highest peaks in NCT are labeled, as well as sites serving as anchors or hinges (e.g., E245, F287, and E333), which exhibit small fluctuations in space. (B) Close-up view of key residues along PS1 MSF profile. PS1 loop HL1 (S104–T124) central portion exhibits large movements. The catalytic residues (D257 and D385) are highly stable (minima). (C) Location of HL1 loop residues (shown as red space-filling) and the broken TM6 (orange) of PS1 where D257 is located. All other structural elements are colored as in Fig. 1 A. The location of NCT peak residues is indicated by the white circle. (D) Top view of the TMD (colored as in Fig. 1; NCT is removed for visual clarity). HL1 covers a large portion of the EC-facing vestibule of PS1. See Figs. 5 and S4 for more details.

Another PS1 region that shows large movements is the broken C-terminal half of TM6 (TM6b; see peak at T274–Q276 in Fig. 4 B) and the adjoining loop (L6) that connects to TM7. A large part of this intracellular-exposed loop was not resolved, consistent with its conformational flexibility, also noted earlier (11,31,33). The kink in TM6, which apparently underlies the high mobility of TM6b, is very close to the catalytic pocket, and the flexibility of TM6b (and L6) is likely to facilitate the exposure of the catalytic pocket to the lipid environment.

### The anticorrelated motions of NCT are enhanced by coupled membrane undulations, whereas the catalytic site stably maintains its local geometry

Fig. 6 A shows the orientational cross correlations,  $C_{ij} = \langle \Delta \mathbf{R}_i \cdot \Delta \mathbf{R}_j \rangle / [\langle (\Delta \mathbf{R}_i)^2 \rangle \langle (\Delta \mathbf{R}_j)^2 \rangle]^{1/2}$ , between the move-

ments of network nodes, each node representing an amino acid or a site on the lipid bilayer (Fig. 6 C). We focus here on the effect of the 10 softest modes, which usually represent the most easily accessible and cooperative movements of the system.  $\langle \Delta \mathbf{R}_i \cdot \Delta \mathbf{R}_j \rangle$  is the cross correlation between the movements of residues  $i$  and  $j$ . By definition,  $C_{ij}$  varies in the range  $-1 \leq C_{ij} \leq 1$ , with the lower and upper limits corresponding to fully correlated (+1) or fully anticorrelated (–1) pairs. Anticorrelated pairs undergo coupled, but opposite-direction, movements (e.g., opening/closing of a cleft). Fig. 6 A reveals the preferential intra- and intersubunit couplings within  $\gamma$ -secretase, as well as the type of coupling to the surrounding lipid bilayer. The two red blocks along the diagonal of Fig. 6 A show the strong intrasubunit coupling within NCT and within the TM subunits, as can be seen more clearly in the enlarged portion of the map in Fig. 6 B. The latter shows that the two NCT lobes, SL and

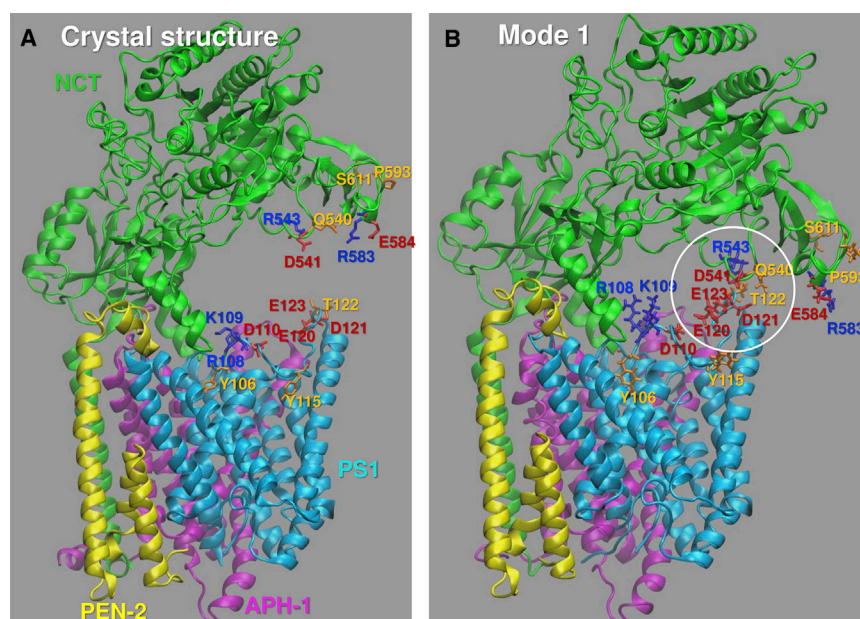

FIGURE 5 Intersubunit contacts between NCT LL and PS1 HL1 facilitated by the global bending mode. (A) Initial structure of the complex (PDB: 5FN2). (B) Closed form enabled by ANM mode 1, based on an RMSD of 4 Å from the initial structure. Q540, D541, R543, R583, E584, P593, and S611 in NCT, and Y106, R108-D110, Y115, and E120–E123 in PS1 are shown as red (negatively charged), blue (positively charged), or orange (polar) sticks. We note a cluster of interactions involving D121–E123 on HL1 and Q540–R543 at the NCT LL surface groove mouth (*encircled*). See also [Movie S1](#) and [Table S1](#) for close intersubunit interactions in the closed form favored by mode 1.

LL, form two internally coherent entities when they are dynamically decoupled with respect to each other, separated by a hinge region near F287; the C-terminal helix of NCT (labeled TM along the axes) is instead correlated with PS1, indicating the role of this helix in maintaining the coupling between NCT and PS1.

Fig. 6 A further shows that the NCT LL undergoes anticorrelated movements with respect to the membrane. To further assess the role of the lipid in the collective dynamics of  $\gamma$ -secretase, we repeated the ANM analysis in the absence of membrane. The map in Fig. 6 E is the counterpart of that in Fig. 6 B computed in the absence of the lipid bilayer. It clearly shows that the strong intra- or intersubunit couplings are significantly weakened, and that the blocks that exhibited coherent dynamics became fragmented, in the absence of membrane. Toward assessing the effect of adopting a more detailed network model for the lipid bilayer, we repeated the membrANM computations with a higher-density representation of the membrane, which confirmed that the softest modes were robustly retained (see Fig. S5). Overall, our analysis suggests that the membrane consolidates the strength of correlations within subunits, and anticorrelations between NCT and TM subunits.

To understand better the physical implications of these cross correlations, we focused on residue D257 as a representative site for the catalytic region in PS1. Fig. 6 D shows the structure color-coded by the strength and types of the cross correlations of D257 with all other residues, deduced from the row corresponding to D257 in the map Fig. 6 B, i.e., the  $i^{\text{th}}$  node/residue in Fig. 6 D is colored by the  $C_{ij}$  value in the row corresponding to  $j = \text{D257}$  (indicated by *dashed line*) in Fig. 6 B. The structural elements that move in the same direction are colored red (strong coupling) or orange (moderate coupling); those coupled but moving in

the opposite directions are blue. Green regions indicate the sites that are uncorrelated, which often act as anchors (to maintain stability) or hinges (between anticorrelated substructures on both sides). The diagram clearly shows that the catalytic residues D257 and D385 take part in a tightly correlated block, i.e., their relative positions, as well as those of the near neighbors M146, W165, and M233 (see Fig. 1 C), remain almost fixed. This is consistent with the precise positioning of a catalytic residue required for chemical specificity, as noted earlier (79) for a series of enzymes. Yet, this does not mean that PS1 is entirely rigid. A closer examination of a selected mode (Figs. 7 and S6) shows that the PS1 HL1 and TM2 N-terminal part (both exposed to the EC region) exhibit anticorrelated (*blue*; opposite directions) motions with respect to the catalytic region, as will be further detailed below, even though the two catalytic residues D257 and D385 stably maintain their relative positions.

#### Within PS1, HL1- and EC-exposed ends of TM2, TM5, and TM9 exhibit anticorrelated movements with respect to the catalytic site

Among the residues that show strong anticorrelations with respect to the catalytic region, we note Y115 and Y106 in HL1, Y240 on TM5, D450 on TM9, and S132 on TM2, shown in spheres in Fig. 7, B and D. S132 and D450 have been pointed out to play a key role in substrate binding (12), and Y106/Y115 and Y240 have been reported to bind a GSM (35). These coupled residues identified here occupy minima positions in Fig. 4 B, which means that they are severely constrained in the global dynamics of PS1 (and the overall complex). Therefore, structural changes at those sites would be accompanied by cooperative

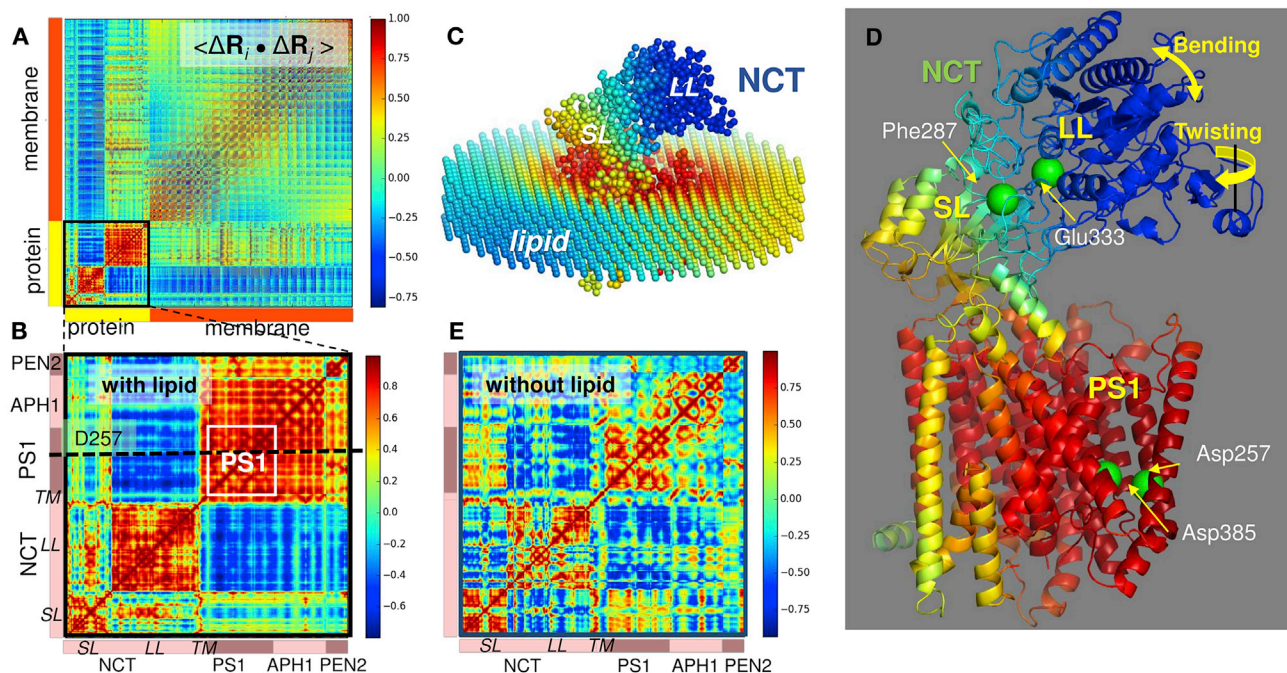

FIGURE 6 Cross correlations between the motions of  $\gamma$ -secretase residues in the membrane environment. (A) Cross correlation map for  $\gamma$ -secretase complex and surrounding lipid bilayer. The entries in the map represent the orientational cross correlations ( $-1 \leq C_{ij} \leq 1$ ; see the scale on the *color-coded bar*) between all pairs of nodes (residues or lipid sites)  $i$  and  $j$ . Red blocks along the diagonal indicate the strongly correlated substructures, and blue regions indicate the anticorrelated (moving in opposite direction) pairs of substructures. Results are based on 10 softest ANM modes. (B) Close-up view of cross correlations within  $\gamma$ -secretase. (C) Network representation of the complex and membrane, colored by the type and strength of correlation with respect to Asp257 (indicated by *dashed line* in B). Blue and red regions exhibit anticorrelated and correlated movements, respectively, with respect to Asp257; yellow/green regions are uncorrelated. (D)  $\gamma$ -secretase color-coded by cross correlations of residues with Asp257. Strongest anticorrelations are observed at the NCT LL (*blue*), whereas PS1 and APH-1 form a highly correlated block (*red*). The NCT SL (residues 34–248 and 651–664) and NCT terminal TM helix (residues 665–698) include hinge sites (*yellow/green*). (E) Same as in (B), in the absence of membrane. An overall weakening in the cooperativity of subunit movements is observed.

compensating rearrangements, or allosteric responses, which would mutually engage the strongly anticorrelated regions.

We also distinguished another mode that cooperatively involved NCT LL tip motions and PS1 collective “breathing”: ANM mode 14 (Fig. 8; Movie S3). During this motion, the cross-sectional area of PS1 (viewed from the EC side) changed from an approximately circular to an elliptical shape and vice versa. Fig. 8 A shows the end conformers alternately accessed, referred to as compact and stretched conformers. Precisely, the EC-facing vestibule lined by TM2-TM3-TM7 stretches into an open form (evidenced by the N190 (TM3)-S132 (TM2) distance increase), whereas TM2-TM6-TM9 contracts (S132-D450 distance decreases), and vice versa (Fig. 8 B).

Our CG MD simulations confirmed the same behavior: N190 and S132/D450 exhibited even larger distance changes (up to 10/17 Å) in CG MD simulations, and a decrease in S132-N190 distance was often accompanied by an increase in S132-D450 distance (Fig. S7 A). To further understand the origin of this particular mode, we examined the PS1 subunit behavior in MD simulations. PCA of PS1 alone showed that a principal mode (PCA2) intrinsically

is favored by the PS1 tertiary structure strongly correlated with the stretching/contraction mode observed in ANM mode 14 (Fig. S7 B).

Remarkably, the net effect of this cooperative motion is a change in interhelical packing near the catalytic site, as can be seen in Fig. 8 C. In the closed PS1, Met146 (TM2) is making close hydrophobic contacts with Leu166 (TM3); likewise, Trp165 (TM3) is interacting with Leu153 (TM2). These tight interactions might restrict the recruitment of a new molecule, whereas ligands can enter/exit more easily in the stretched state. It is interesting to note that when the PS1 sample is of the stretched state, the NCT LL tip (His610-T614) opens-up simultaneously, and vice versa (see Movie S3). Thus, synchronous movements of NCT and PS1 may help ligand insertion into the cavity.

### Conclusion from ANM analysis

Overall, this analysis shows that despite the lack of correlation between the global bending and twisting of NCT and the local conformational changes in the catalytic site, the complex has access to mechanisms of motions that couple the NCT ligand-binding and PS1 catalytic sites. This is



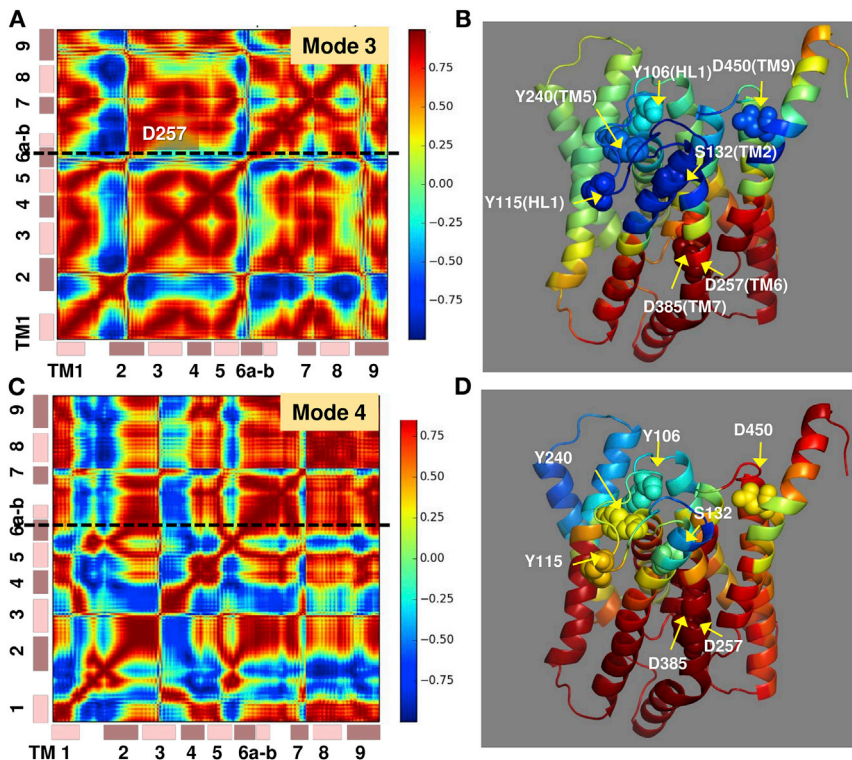

FIGURE 7 Anticorrelations between EC-exposed ends and the catalytic site observed in ANM modes 3 and 4 accessible to the complex. Cross correlations driven by ANM modes 3 (A) and 4 (C) are displayed, and corresponding respective diagrams (B and D) color-coded by the correlations of all PS1 residues with respect to Asp257. The two catalytic residues (D257 in TM6 and D385 in TM7) are shown in spheres as well as selected residues (e.g., Y106 (HL1), Y115 (HL1), Y240 (TM5), S132 (TM2), and D450 (TM9)) that either exhibit strong anticorrelations (blue) or act as hinge centers (yellow). Y106, Y115, and Y240 are involved in GSM binding, and S132 and D450 in substrate binding.

achieved through intermediate regions such as the NCT LL mouth/tip R583-E613, the PS1 HL1, and the EC-exposed ends of TM5, TM9, and TM2 helices, whose motions are mediated by global hinges (e.g., at the NCT-TMD interface or the NCT LL-SL groove). Thus, our analysis identified sites that may play a key mechanical role in substrate binding and proper positioning for cleavage. The next question is then: are these sites druggable? We now proceed to druggability simulations to explore whether the regions distinguished here by correlated events, or those key sites controlling these correlated movements, can be effectively targeted by drug-like molecules.

### Druggability simulations reveal multiple druggable sites on PS1, including both orthosteric and allosteric sites

We first performed a series of druggability simulations for PS1 alone and for PS1 in the contact of the intact protease (Table S2). Simulations for the intact  $\gamma$ -secretase yielded six druggable sites on PS1, labeled R1–R6 in Figs. 9, A and B and S8. Druggable sites are indicated by circles enclosing the clusters of probe molecules (shown as spheres) that were found to consistently bind those regions, called hot spots. Among them, R1 was invariably detected in all runs performed for the intact secretase as well as isolated PS1 to be a high-affinity druggable site, with an estimated binding affinity of  $-14.4$  to  $-11.6$  kcal/mol (Table S2). R1 coincides with the central catalytic cavity of PS1

(Fig. 9 A) and therefore represents an orthosteric binding site. Probes bound therein were observed to make contacts with the catalytic residues Asp257 and Asp385, as well as the spatial neighbors Met146, Trp165, Met233, and Gly384, reported to possibly bind the inhibitor DAPT (11). Even though this region is buried, it easily attracted probes (originally located in the solution).

Notably, the R2 site, adjacent to R1, included the HL1 residues Y106 and Y115 as well as the spatially neighboring F177 and Y240, which coincides with a GSM-binding site (35). These are highly stable residues (minima in Fig. 4 B) that communicate directly with HL1 residues affected by the global bending (Figs. 2, A and B, 5, and S4) and twisting (Fig. 2, C and D), in addition to undergoing anticorrelated motions with respect to the catalytic site (Fig. 7), hence the significance of this site allosteric modulation of activity.

The druggable site R3 was located between TM2 and TM9, near the EC region, close to S132 and D450 (Fig. 9 B). These two residues were reported to be involved in substrate gating (12). The same site also includes L250, whose distance from L435 was reported (35) to change upon GSM binding.

Site R4 was widely distributed along TM1 and TM8, at the interface with APH-1 (see Fig. S8). It was detected in all three runs conducted for the intact protein and confirmed in two performed for the isolated subunit PS1 (Table S2). Likewise, R6 emerged in the simulations of the intact protein, at the interface between TM8–TM9 and subunit APH-1. R5 was near the C-terminal end of TM9.

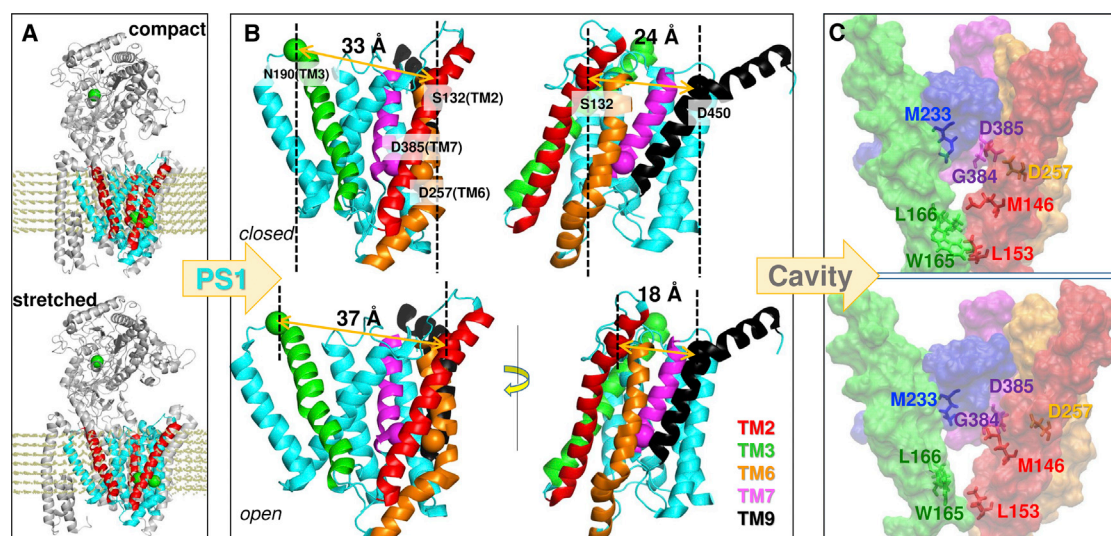

**FIGURE 8** Asymmetric breathing motion of PS1. (A) A pair of conformers, compact and stretched, sampled during reconfiguration of PS1 along ANM mode 14 of the protease complex-lipid system is shown. The conformers are obtained based on an RMSD of 4 Å each with respect to the initial (PDB) structure. TM2, TM3, and TM7 are colored red. Glu333 in NCT1, and Asp257 and Asp385 in PS1, are shown in green spheres. (B) Close-up view of interhelical distance changes in the two conformers. TM2, TM3, TM6, TM7, and TM9 are colored as in Fig. 1 C; other TM helices are cyan. The left diagrams display PS1 from the same perspective as in (A); the right diagrams are rotated around the normal to the membrane plane, to facilitate the visualization of the TM2–TM9 distance. Asp257, Asp385, Ser132 (TM2), Asn190 (TM3), and Asp450 (TM9) are shown in spheres colored by the corresponding TMs. S132–N190 (left) and S132–D450 (right) distances show opposite changes, i.e., an increase in the former is accompanied by a decrease in the latter and vice versa. (C) Catalytic cavity in the respective conformers, with TM2–TM7 shown in space-filling. Side chain positions obtained by energy minimization are shown for selected residues. See also [Movie S3](#).

### Druggable sites on NCT are localized at hinge sites that control the opening/closure of the substrate-binding groove

[Figs. 9, C and E](#) and [S8](#) give an overview of druggable sites on NCT and APH-1. No druggable site was detected on PEN2. A new TM region, R7, at the interface between the NCT C-terminal TM helix and APH-1, was found in all three simulations to yield high binding energies ( $\leq -13.0$  kcal/mol) (see [Table S2](#)). As for the EC region, five sites RA-RE ([Fig. 9, C and E](#)) were detected. Although corresponding probe-binding affinities were relatively lower compared to the other hot spots on PS1 and APH-1, these are evidently more accessible, being in the EC region, and interestingly most were located near the hinge region between NCT and TM subunits, or around the substrate-binding groove whose opening/closure with respect to the PS1 HL1 was noted above ([Figs. 5 and S4](#)), suggesting that RA-RE could serve as allo-targeting sites.

[Fig. 9, D and E](#) present a more detailed analysis. [Fig. 9 D](#) shows square fluctuations in NCT residues driven by the softest ANM modes (modes 1 and 2 that control the opening/closure of the groove mouth; see [Fig. 2, A and C](#)). NCT sequence spans the regions SL and LL, and then back to SL and TM (C-terminal helix). Many SL residues are severely constrained, participating in two hinge-bending centers: one with the TM subunits APH-1 and PS1, and another with the NCT LL. The constrained regions (minima in [Fig. 9 D](#)) include N34–A122 (shown in *blue band*),

P179–C248 (*ice blue band*), and S651–A664 (*purple band*). These are colored in the same way in the ribbon diagrams displayed in [Fig. 9, C and E](#). All the druggable sites on NCT either overlap or make close contacts with these constrained regions. The hinge centers therein are indicated by the red spheres in the ribbon diagrams ([Fig. 9, C and E](#)) and red arrows in the fluctuation profile ([Fig. 9 D](#)). Among the druggable sites, we note that RB is located at the hinge near the LL–SL interface as well as PS1 HL1, making it a highly susceptible site for binding a GSM.

Overall, this analysis shows that NCT presents several druggable sites, including those closely neighboring hinge centers that mediate the cooperative rearrangements of the EC part of the complex with respect to its TMD or the movements of NCT LL with respect to SL. These movements directly affect the exposure or closure of the surface groove over HL1. Targeting those sites thus opens, to our knowledge, new avenues for allosterically controlling the access of substrate to PS1 EC-facing vestibule and potentially obstructing access to the  $\gamma$ -secretase active site.

### PS1 inhibitors and modulators bind orthosteric and allosteric sites consistent with druggability simulations

We first examined the binding properties of two reported  $\gamma$ -secretase inhibitors (DAPT and BMS-708163, with the  $IC_{50}$  values of 120 and 0.3 nM, respectively) onto the R1

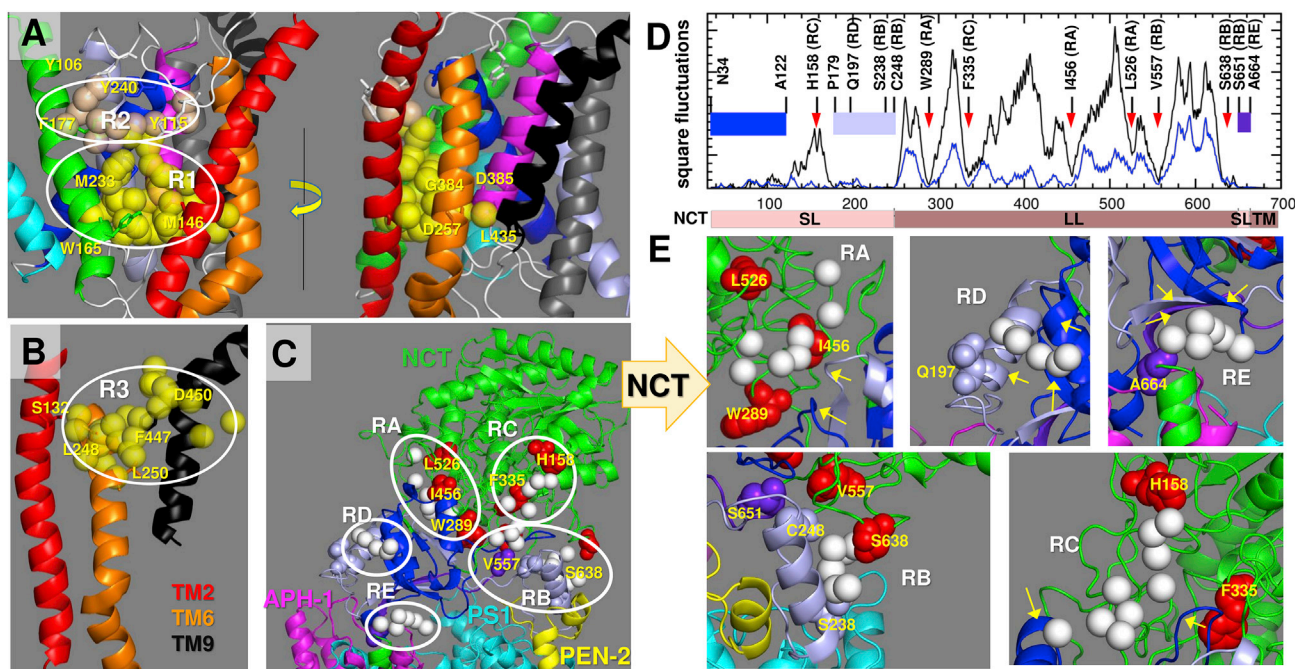

**FIGURE 9** High-affinity sites identified by druggability simulations of the intact complex. (A and B) Druggable regions of PS1. TM helices are colored as in Fig. 1 A. Three druggable sites are observed, labeled as R1–R3, composed each of a cluster of hot spots (in *cream/yellow spheres*). Y106 and Y115 (HL1); S132 and M146 (TM2); W165 and F177 (TM3); M233 and Y240 (TM5); L248, L250, and D257 (TM6); G384 and D385 (TM7); and L435, F447, and D450 (TM9) are shown as sticks and labeled. (C) Druggable regions on NCT, labeled RA–RE. Druggable hotspots are shown in white. Sites colored blue, ice blue, and purple participate in the hinge regions, and red spheres act as hinge centers. (D) Square fluctuations driven by ANM modes 1 (*black line*) and 2 (*blue line*). The hinge regions and residues are marked by bands (*blue, ice blue, and purple*) and red arrows. Residues of interest at druggable sites are indicated. (E) Zoom-in views of each druggable region in NCT. Hinge residues close to druggable sites are labeled and indicated by yellow arrows. See Table S2 for estimated binding affinities at those sites, and Fig. S8 for additional druggable sites.

site. As depicted in Fig. 10 A, high-affinity binding poses were attained for these drugs, although R1 was relatively buried in the TMD. The binding pocket is lined by TM2, TM3, TM5, and TM7, and involves Met146, Thr147, Trp165, Leu166, Ser169, Met233, Phe283, and Gly384, in close agreement with the hot spot and coordinating residues reported above (see Fig. 9 A). Met146, Trp165, and Leu166 make hydrophobic contacts with the chlorobenzene group on DAPT and *m*-difluorobenzene group on BMS-708163; the methyl group on DAPT and the methylene group on BMS-708163 are both positioned to interact with the methyl thio group on Met233; and Thr147 forms a hydrogen bond with one of the carbonyl groups on DAPT. Interestingly, Phe283 exhibits a  $\pi$ - $\pi$  conjugation with a fluorobenzene group on BMS-708163, which may explain the stronger activity of BMS-708163 compared to that of DAPT. Overall, these docking results suggest that Met146, Thr147, Trp165, and Met233 play a role in binding orthosteric ligands consistent with the R1 region deduced from druggability simulations to serve as hot spots.

As a further test, we examined the binding pose of three additional  $\gamma$ -secretase inhibitors from the ChEMBL database, ChEMBL2159511 ( $IC_{50}$ : 1.3 nM), ChEMBL2159691 ( $IC_{50}$ : 37 nM), and ChEMBL2159687 ( $IC_{50}$ : 20 nM). These compounds share the same scaffold but have different func-

tional groups ((methylsulfonyl)ethane, acetonitrile, and ethanol). As shown in Fig. S9, Trp165, Leu166, and Met233 interact with the fluorine atom that connects to the benzene. Strong hydrophobic interactions were observed between Phe283 and the aromatic groups of the ligands. Thr147 formed a hydrogen bond with each of the functional groups as indicated by the interatomic distance of 2.0–2.1 Å. However, we found that (methylsulfonyl)ethane formed strong hydrophobic interactions with Leu268 (2.7 Å, shown by *dashed line*) and the backbone of Lys265 (2.2 Å), which might make ChEMBL2159511 more potent.

Docking simulations were also performed for two GSMs: E2012 and ST1120. These simulations confirmed the high affinity of site R2 (Fig. 10, B and C), which involved Y106 and Y115 (on HL1), N135 (TM2), Phe177 (TM3), and Y240 (TM5). The two modulators exhibited almost the same interactions upon slight rearrangements of the conformations of these key residues. For example, both formed a hydrogen bond with Tyr115, and made  $\pi$ - $\pi$  interaction with Tyr240 and hydrophobic interaction with Phe177. ST1120 has been reported to bind to the extended HL1 at the EC vestibule of PS1 (35), and E2012 has been reported to bind to the N-terminal fragment TM1–TM6 of PS1 (80).

We also performed docking simulations, using conformers sampled along ANM 14, to examine the effect of

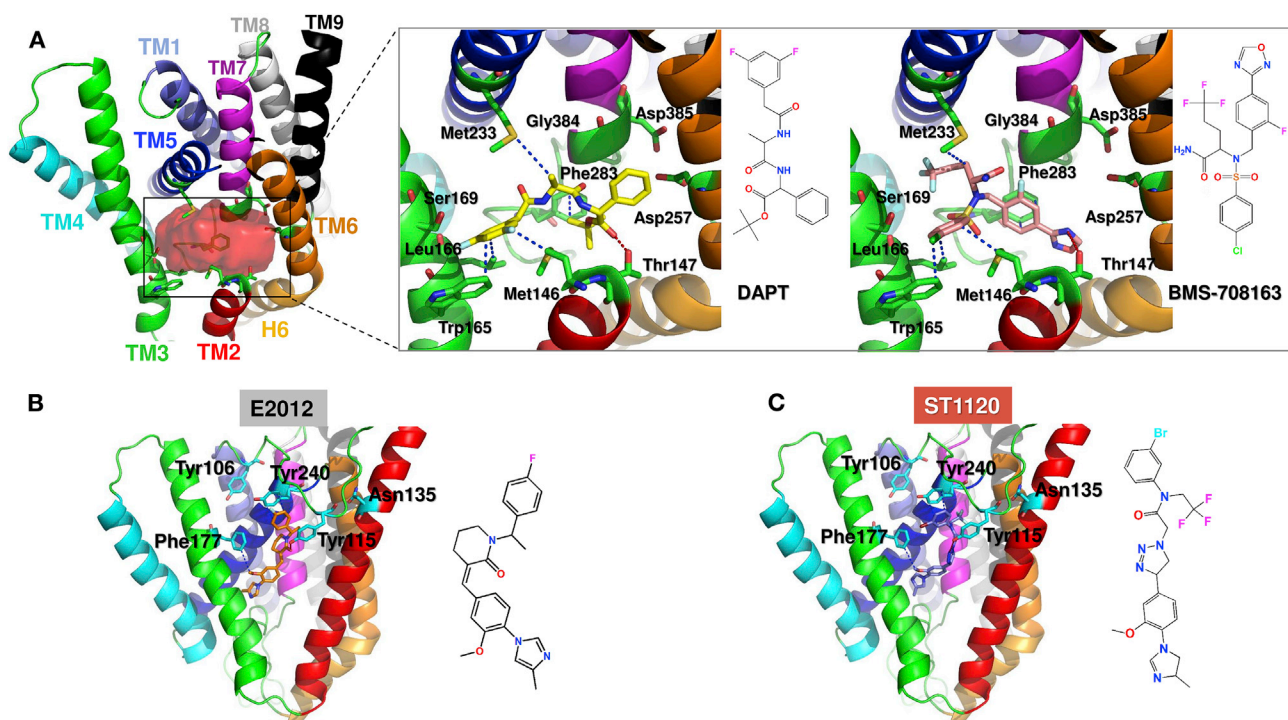

FIGURE 10 Binding of inhibitors (DAPT and BMS-708163) and modulators (E2012 and ST1120) to PS1. (A) Orthosteric site near D257 and D385, also identified as the top-ranking druggable site R1 (in Fig. 9 A), binds both inhibitors. Binding pose of each inhibitor is shown in the magnified diagrams on the right. The same set of residues (*labeled*) coordinate both drugs. (B and C) Binding of modulators E2012 and ST1120 to the allosteric site R2 identified in Fig. 9 A. Coordinating residues include Y106 and Y115 (on the EC loop HL1), N135 (TM2), Phe177(TM3), and Y240 (TM5).

volume expansion near the catalytic site. Both inhibitors, DAPT and BMS-708163, exhibited higher affinity to bind the expanded state of PS1, compared to binding the PDB structure. As illustrated in Fig. S10, BMS-708163 interacts with Met146 and Trp165 in the expanded, but not in the contracted, conformation of PS1. That is, PS1 volume increase enhances orthosteric inhibitor binding. Computations repeated with modes 1 and 7 had smaller effects on inhibitor binding, but affected the modulator binding affinity. Interestingly, the modulators E2012 and ST1120 both exhibited the highest docking score in the original (PDB) structure and the lowest in mode in the closed/compact states driven by modes 1 and 7, indicating that the NCT lid closure interfered with modulator binding.

## DISCUSSION

### Anticorrelated movement of NCT with respect to PS1 HL1 emerges as a structure-encoded mechanism for modulating substrate recruitment and positioning

Our analysis suggests a simple mechanistic model (Fig. 11) for facilitating substrate binding, successive cleavage at two sites, and release of peptide ( $A\beta$ ) to the EC region, mediated by the structure-encoded global dynamics of the intact  $\gamma$ -secretase complex. We have shown that the  $\gamma$ -secretase

ectodomain (NCT) is highly dynamic, as indicated by previous studies (36–38). It enjoys large bending and twisting motions, allowing for changes in the size of a major groove that has been reported to bind substrate (12) and modulators (35). Based on the hinge regions observed in our ANM analysis,  $\gamma$ -secretase can be divided into three substructures: the TMD (composed of PS1, AHP-1, PEN-2, and the C-terminal helix of NCT; *red*), the NCT SL (*blue*), and the NCT LL (*green*). Two hinge regions separate these three substructures, labeled hinge 1 and hinge 2 in Fig. 11 A. NCT fluctuates between open and closed forms; due to the rotational flexibility endowed by these hinges (and thermal fluctuations), either form may be stabilized upon ligand binding. For example, binding of a modulator near HL1 can potentially stabilize the closed form as shown in Figs. 2, 5 B, and S4. NCT harbors substrate-binding sites (17–19) and the TMD contains the catalytic site, schematically shown by blue spheres in Fig. 11, B–E. The structure-encoded bending and twisting of NCT gives rise to dramatic changes in the distance between NCT LL and PS1 at the groove; if NCT is in the open state (Fig. 11 C), the substrate can insert into the groove and bind to NCT or PS1, but if NCT is closed (as in Fig. 11 B), it cannot. NCT motions are thus proposed to play a critical role in allowing or blocking substrate recognition and/or binding.

Fig. 11, C and D schematically describes the successive  $\epsilon$ - and  $\gamma$ -cleavages of the substrate. According to the two-step

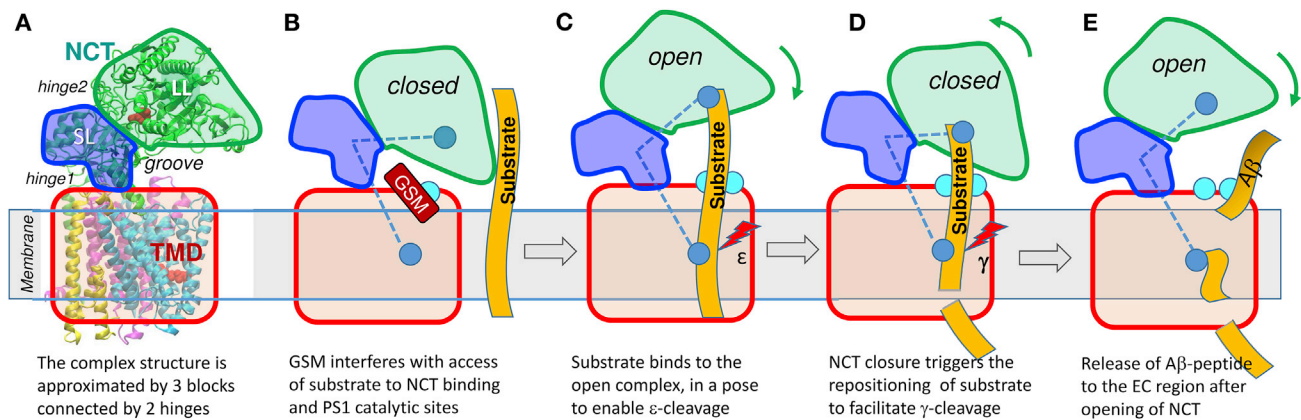

FIGURE 11 Schematic description of a model for peptide binding, repositioning, cleavage, and release modulated by the opening/closure of NCT with respect to the TMD. (A) Schematic diagram of  $\gamma$ -secretase. NCT is composed of two lobes, LL and SL, shown in green and blue separated by hinge 2, and the transmembrane domain (TMD) is in red, with interfacial hinge 1 enabling the relative movement of NCT SL with respect to TMD. NCT fluctuates between open and closed states. (B) Binding of modulator (GSM, dark red) to the allosteric site (cyan) near HL1/TM2 (on PS1) or the interlobe groove (on NCT) stabilizes the closed form and obstructs the access of the substrate peptide (orange, extended from EC to TM region) to its binding site and to the PS1 catalytic site. Blue ball in NCT is substrate-binding site and blue ball in TMD is catalytic site. (C) Suggested binding pose of substrate, attached on top to NCT, and exposed at the bottom to the catalytic site. (D) Sliding of the substrate to expose a new cleavage site to the catalytic region, facilitated by the closure of NCT. Open and closed states may thus help proper positioning of the successive cleavage sites:  $\epsilon$  cleavage occurs in open state (C) and  $\gamma$  cleavage in closed state (D). (E) Subsequent opening of NCT permits the release of the A $\beta$  peptide to the EC region.

substrate-recognition process proposed in a recent study (12): 1) a first binding site (for  $\epsilon$ -cleavage) forms upon re-configuration of PS1 residues S132 and D450 to expose a hydrophobic site for substrate binding and 2) the C-terminal fragment on PS1, which closely neighbors the HL1/TM2 N-terminal end, serves as a second site for  $\gamma$ -cleavage of the substrate (APP). We note that both sites were identified by our simulations to be druggable (Fig. 9), and the latter was shown to bind GSMs (Fig. 10). We propose here that the anticorrelated movements of NCT, to which one end of the substrate is bound, may assist in the repositioning of the substrate for  $\gamma$ -cleavage. Finally, the release of the resulting A $\beta$  peptide to the EC region can also be facilitated by the opening of NCT (Fig. 11 E).

### The intact $\gamma$ -secretase offers multiple sites for allo-targeting

Enzymatic activity is often inhibited by targeting the catalytic site with orthosteric inhibitors. However, in recent years, allosteric inhibition, especially in the case of multidomain/multisubunit proteins that interact with multiple substrates, has emerged as a more specific approach to interfere with selected pathways upon blocking selected interactions (81,82).  $\gamma$ -secretase is such a target. There has been a growing interest in developing allosteric modulators of  $\gamma$ -secretase, which would be selective for A $\beta$  modulation, but would not impair the processing of other  $\gamma$ -secretase substrates such as Notch, EphB2, or EphA4. This motivated the original discovery of nonsteroidal anti-inflammatory drugs (R-flurbiprofen and sulindac sulfide) by AstraZeneca, and more recently, a second generation of GSMs (E2012) by

Eisai (23). The two groups of compounds were anticipated to have a different mechanism of action. Recent studies have shown that the photoaffinity probe E2012-BPyn specifically labels the N-terminal fragment of PS1 (80) when PS1 is in the active state (but not inactive state), indicating that (the parent imidazole) E2012 binds the specific location that becomes accessible upon PS1 activation. Notably, this binding site is different from those of other GSMs (cid GSM-1, allosteric GSI BMS-708163, or substrate docking site peptide inhibitor pep11). Johnson et al. concluded that “multiple binding sites within the  $\gamma$ -secretase complex exist, each of which may contribute to different modes of modulatory action” (80). Our study demonstrates that such allosteric sites indeed exist in the complex, and many of these were also shown to play a key role in controlling the collective dynamics, and thereby substrate-binding properties.

A recent study of the mode of actions of phenylimidazole-type GSMs using a chemical biology approach and systematic mutagenesis revealed that an increase in the proteolytic activity of  $\gamma$ -secretase and a reduction in A $\beta$  toxicity takes place in a selective way (35), as a result of a conformational change at the catalytic center induced upon binding of a modulator (ST1120) to the extended HL1 at the EC vestibule of PS1. Although this study was based on a structural model derived from the PS1 ortholog from the archaea *Methanococcus marisnigri* (83), we had the opportunity to use the cryo-electron microscopy structure resolved for the human  $\gamma$ -secretase complex and draw conclusions for PS1 conformational dynamics based on the intact structure embedded in the lipid bilayer. Photoaffinity labeling experiments and alanine substitutions

suggested that the EC pocket formed by HL1/TM2/TM5—and in particular the PS1 residues Y106 and Y115 (on the EC loop HL1), N135 (TM2), and Y240 (TM5)—were involved in the interaction of PS1 with the phenylimidazole-type GSM (35). Our analysis (Fig. 10) confirms the involvement of these residues in binding ST1120 and further sheds light on detailed interatomic interactions at the binding site, as well as the mechanistic basis of the GSM action.

The lipid bilayer restricts the motion of the TMD. However, the distance changes in TM2–TM3 or TM2–TM9, indicated by both ANM and CG MD (see Fig. 8; Figs. S6 and S7), support the view that TM2–TM3 (11) and TM2–TM9 (12) can serve as lateral gates for substrate entering. We suggest that TM2 plays a major role in gating motions that control the access to the catalytic site, from the horseshoe-like opening of PS1, and computational studies that take account of the adaptability of (or volume changes in) the PS1 central cavity are likely to detect new inhibitors.

### NCT can serve as a new target for allosteric modulation of $\gamma$ -secretase dynamics

In addition to PS1, which harbors a number of allosteric sites, our analysis suggests that NCT can also bind allosteric modulators (Fig. 9). Many residues that take part in hinge regions at NCT were found to be druggable, meaning that the equilibrium between the open and closed states of NCT can be shifted in one direction or another (depending on the modulator), or that the movements accessible to the complex could be altered. Previous studies have reported inhibitory actions originating from structural change (38) and also dynamic changes in NCT (37). Here, we attribute the effect of NCT to the twisting and bending motions inherently favored by the overall architecture of  $\gamma$ -secretase, which were also reported in recent CG MD simulations of the intact structure (33). Bai et al. (29) suggested that NCT rotation could shorten the distance between the sites of NCT and PS1. Here, we show how NCT can indeed have contacts with PS1 HL1 residues, such as Y115, which are involved in modulator binding (35) (Fig. S4; Table S1).

The cleft (or groove) between NCT LL and SL and PS1 HL1 is distinguished here as a region that is likely to bind a modulator. In particular, the site RB in this cleft was found to be highly druggable (Fig. 9 E). This site neighbors the hinge residues V557, S638, and S651 and the anchor helical residues S238–C248, and thus represents a mechanically constrained, yet solvent-exposed and druggable, site. Targeting this site would directly interfere with the hinge-bending mobility of the NCT SL-TMD interface. Furthermore, the same site is located only 10–15 Å from HL1 (e.g., residues K109 and N112), such that binding of a modulator is likely to interfere with the HL1 motions, which in turn may alter the interhelical interactions involving S132, Y446, F447, and D450. Note that the latter set of

residues harbor another druggable site, R3, which may also serve as an allosteric modulation site.

In summary, although we focused (and demonstrated *in silico*) the high affinity of sites R1 and R2 on PS1 to bind (in accord with earlier experiments) inhibitors and modulators, respectively (Fig. 10; Figs. S9 and S10), two other sites for allo-targeting emerged from this analysis: R3 on PS1 (Fig. 9 B) and RB on NCT (Fig. 9 E). These results, to our knowledge, open up new paths for the development of allosteric modulators of  $\gamma$ -secretase APP processing activity, to be advanced by future work.

## SUPPORTING MATERIAL

Supporting Materials and Methods, ten figures, two tables, and three movies are available at [http://www.biophysj.org/biophysj/supplemental/S0006-3495\(17\)31126-8](http://www.biophysj.org/biophysj/supplemental/S0006-3495(17)31126-8).

## AUTHOR CONTRIBUTIONS

J.Y.L., Z.F., X.-Q.X., and I.B. designed and performed research. J.Y.L., Z.F., and I.B. analyzed data and wrote the manuscript.

## ACKNOWLEDGMENTS

The authors acknowledge funding from the National Institutes of Health (P41 GM103712 (I.B.), P30 DA035778 (I.B. and X.-Q.X.), and R01 DA025612 (X.-Q.X.)) and the Department of Defense (W81XWH-16-1-0490 (X.-Q.X.)).

## REFERENCES

- Selkoe, D. J., and M. S. Wolfe. 2007. Presenilin: running with scissors in the membrane. *Cell*. 131:215–221.
- De Strooper, B., T. Iwatsubo, and M. S. Wolfe. 2012. Presenilins and  $\gamma$ -secretase: structure, function, and role in Alzheimer Disease. *Cold Spring Harb. Perspect. Med.* 2:a006304.
- Struhl, G., and A. Adachi. 2000. Requirements for presenilin-dependent cleavage of notch and other transmembrane proteins. *Mol. Cell*. 6:625–636.
- Wolfe, M. S. 2012.  $\gamma$ -Secretase as a target for Alzheimer's disease. *Adv. Pharmacol.* 64:127–153.
- Sobhanifar, S., B. Schneider, ..., V. Dötsch. 2010. Structural investigation of the C-terminal catalytic fragment of presenilin 1. *Proc. Natl. Acad. Sci. USA*. 107:9644–9649.
- De Strooper, B. 2003. Aph-1, Pen-2, and Nicastrin with Presenilin generate an active  $\gamma$ -Secretase complex. *Neuron*. 38:9–12.
- Kimberly, W. T., M. J. LaVoie, ..., D. J. Selkoe. 2003.  $\gamma$ -secretase is a membrane protein complex comprised of presenilin, nicastrin, Aph-1, and Pen-2. *Proc. Natl. Acad. Sci. USA*. 100:6382–6387.
- Wolfe, M. S., W. Xia, ..., D. J. Selkoe. 1999. Two transmembrane aspartates in presenilin-1 required for presenilin endoproteolysis and  $\gamma$ -secretase activity. *Nature*. 398:513–517.
- De Strooper, B., P. Saftig, ..., F. Van Leuven. 1998. Deficiency of presenilin-1 inhibits the normal cleavage of amyloid precursor protein. *Nature*. 391:387–390.
- Struhl, G., and I. Greenwald. 1999. Presenilin is required for activity and nuclear access of Notch in *Drosophila*. *Nature*. 398:522–525.

11. Bai, X. C., E. Rajendra, ..., S. H. W. Scheres. 2015. Sampling the conformational space of the catalytic subunit of human  $\gamma$ -secretase. *Elife*. 4:e11182.
12. Takagi-Niidome, S., T. Sasaki, ..., T. Tomita. 2015. Cooperative roles of hydrophilic loop 1 and the C-terminus of presenilin 1 in the substrate-gating mechanism of  $\gamma$ -secretase. *J. Neurosci.* 35:2646–2656.
13. Selkoe, D. J. 2001. Presenilin, Notch, and the genesis and treatment of Alzheimer's disease. *Proc. Natl. Acad. Sci. USA.* 98:11039–11041.
14. Chen, F., H. Hasegawa, ..., P. Fraser. 2006. TMP21 is a presenilin complex component that modulates  $\gamma$ -secretase but not  $\epsilon$ -secretase activity. *Nature.* 440:1208–1212.
15. Chávez-Gutiérrez, L., L. Bammens, ..., B. De Strooper. 2012. The mechanism of  $\gamma$ -Secretase dysfunction in familial Alzheimer disease. *EMBO J.* 31:2261–2274.
16. Sun, L., R. Zhou, ..., Y. Shi. 2017. Analysis of 138 pathogenic mutations in presenilin-1 on the in vitro production of A $\beta$ 42 and A $\beta$ 40 peptides by  $\gamma$ -secretase. *Proc. Natl. Acad. Sci. USA.* 114:E476–E485.
17. Shah, S., S. F. Lee, ..., G. Yu. 2005. Nicastrin functions as a  $\gamma$ -secretase-substrate receptor. *Cell.* 122:435–447.
18. Yu, G., M. Nishimura, ..., P. St George-Hyslop. 2000. Nicastrin modulates presenilin-mediated notch/glp-1 signal transduction and betaAPP processing. *Nature.* 407:48–54.
19. Dries, D. R., S. Shah, ..., G. Yu. 2009. Glu-333 of nicastrin directly participates in  $\gamma$ -secretase activity. *J. Biol. Chem.* 284:29714–29724.
20. Takasugi, N., T. Tomita, ..., T. Iwatsubo. 2003. The role of presenilin cofactors in the  $\gamma$ -secretase complex. *Nature.* 422:438–441.
21. Lee, S. F., S. Shah, ..., G. Yu. 2004. A conserved GXXXG motif in APH-1 is critical for assembly and activity of the  $\gamma$ -secretase complex. *J. Biol. Chem.* 279:4144–4152.
22. Golde, T. E., E. H. Koo, ..., L. Miele. 2013.  $\gamma$ -Secretase inhibitors and modulators. *Biochim. Biophys. Acta.* 1828:2898–2907.
23. Borgegard, T., A. Jureus, ..., J. Lundkvist. 2012. First and second generation  $\gamma$ -secretase modulators (GSMs) modulate amyloid- $\beta$  (A $\beta$ ) peptide production through different mechanisms. *J. Biol. Chem.* 287:11810–11819.
24. Frykman, S., Y. Teranishi, ..., L. O. Tjernberg. 2012. Identification of two novel synaptic  $\gamma$ -secretase associated proteins that affect amyloid  $\beta$ -peptide levels without altering Notch processing. *Neurochem. Int.* 61:108–118.
25. Weggen, S., J. L. Eriksen, ..., E. H. Koo. 2003. Evidence that nonsteroidal anti-inflammatory drugs decrease amyloid  $\beta$  42 production by direct modulation of  $\gamma$ -secretase activity. *J. Biol. Chem.* 278:31831–31837.
26. Behr, D., E. E. Clarke, ..., M. S. Shearman. 2004. Selected non-steroidal anti-inflammatory drugs and their derivatives target  $\gamma$ -secretase at a novel site. Evidence for an allosteric mechanism. *J. Biol. Chem.* 279:43419–43426.
27. Shelton, C. C., L. Zhu, ..., Y. M. Li. 2009. Modulation of  $\gamma$ -secretase specificity using small molecule allosteric inhibitors. *Proc. Natl. Acad. Sci. USA.* 106:20228–20233.
28. Crump, C. J., D. S. Johnson, and Y. M. Li. 2013. Development and mechanism of  $\gamma$ -secretase modulators for Alzheimer's disease. *Biochemistry.* 52:3197–3216.
29. Bai, X. C., C. Yan, ..., Y. Shi. 2015. An atomic structure of human  $\gamma$ -secretase. *Nature.* 525:212–217.
30. Watanabe, N., I. I. Image Image, ..., I. Image Image. 2010. Functional analysis of the transmembrane domains of presenilin 1: participation of transmembrane domains 2 and 6 in the formation of initial substrate-binding site of  $\gamma$ -secretase. *J. Biol. Chem.* 285:19738–19746.
31. Somavarapu, A. K., and K. P. Kepp. 2016. The dynamic mechanism of presenilin-1 function: Sensitive gate dynamics and loop unplugging control protein access. *Neurobiol. Dis.* 89:147–156.
32. Li, S., W. Zhang, and W. Han. 2017. Initial substrate binding of  $\gamma$ -secretase: The role of substrate flexibility. *ACS Chem. Neurosci.* 8:1279–1290.
33. Aguayo-Ortiz, R., C. Chávez-García, ..., L. Dominguez. 2017. Characterizing the structural ensemble of  $\gamma$ -secretase using a multiscale molecular dynamics approach. *Chem. Sci.* 8:5576–5584.
34. Gong, P., K. S. Vetrivel, ..., G. Thinakaran. 2010. Mutation analysis of the presenilin 1 N-terminal domain reveals a broad spectrum of  $\gamma$ -secretase activity toward amyloid precursor protein and other substrates. *J. Biol. Chem.* 285:38042–38052.
35. Takeo, K., S. Tanimura, ..., T. Iwatsubo. 2014. Allosteric regulation of  $\gamma$ -secretase activity by a phenylimidazole-type  $\gamma$ -secretase modulator. *Proc. Natl. Acad. Sci. USA.* 111:10544–10549.
36. Xie, T., C. Yan, ..., Y. Shi. 2014. Crystal structure of the  $\gamma$ -secretase component nicastrin. *Proc. Natl. Acad. Sci. USA.* 111:13349–13354.
37. Elad, N., B. De Strooper, ..., L. Chávez-Gutiérrez. 2015. The dynamic conformational landscape of  $\gamma$ -secretase. *J. Cell Sci.* 128:589–598.
38. Li, Y., S. H. Lu, ..., P. H. St George-Hyslop. 2014. Structural interactions between inhibitor and substrate docking sites give insight into mechanisms of human PS1 complexes. *Structure.* 22:125–135.
39. Bolduc, D. M., D. R. Montagna, ..., M. S. Wolfe. 2016. Nicastrin functions to sterically hinder  $\gamma$ -secretase-substrate interactions driven by substrate transmembrane domain. *Proc. Natl. Acad. Sci. USA.* 113:E509–E518.
40. Zhao, G., Z. Liu, ..., R. Kopan. 2010.  $\gamma$ -secretase composed of PS1/Pen2/Aph1a can cleave notch and amyloid precursor protein in the absence of nicastrin. *J. Neurosci.* 30:1648–1656.
41. Chávez-Gutiérrez, L., A. Tolia, ..., B. de Strooper. 2008. Glu(332) in the Nicastrin ectodomain is essential for  $\gamma$ -secretase complex maturation but not for its activity. *J. Biol. Chem.* 283:20096–20105.
42. Atilgan, A. R., S. R. Durell, ..., I. Bahar. 2001. Anisotropy of fluctuation dynamics of proteins with an elastic network model. *Biophys. J.* 80:505–515.
43. Eyal, E., G. Lum, and I. Bahar. 2015. The anisotropic network model web server at 2015 (ANM 2.0). *Bioinformatics.* 31:1487–1489.
44. Nussinov, R., and C. J. Tsai. 2013. Allostery in disease and in drug discovery. *Cell.* 153:293–305.
45. Wagner, J. R., C. T. Lee, ..., R. E. Amaro. 2016. Emerging computational methods for the rational discovery of allosteric drugs. *Chem. Rev.* 116:6370–6390.
46. Dokholyan, N. V. 2016. Controlling allosteric networks in proteins. *Chem. Rev.* 116:6463–6487.
47. Lu, P., X. C. Bai, ..., Y. Shi. 2014. Three-dimensional structure of human  $\gamma$ -secretase. *Nature.* 512:166–170.
48. Bahar, I., T. R. Lezon, ..., E. Eyal. 2010. Global dynamics of proteins: bridging between structure and function. *Annu. Rev. Biophys.* 39:23–42.
49. Bahar, I. 2010. On the functional significance of soft modes predicted by coarse-grained models for membrane proteins. *J. Gen. Physiol.* 135:563–573.
50. Fuglebakk, E., S. P. Tiwari, and N. Reuter. 2015. Comparing the intrinsic dynamics of multiple protein structures using elastic network models. *Biochim. Biophys. Acta.* 1850:911–922.
51. López-Blanco, J. R., and P. Chacón. 2016. New generation of elastic network models. *Curr. Opin. Struct. Biol.* 37:46–53.
52. Bakan, A., N. Nevins, ..., I. Bahar. 2012. Druggability assessment of allosteric proteins by dynamics simulations in the presence of probe molecules. *J. Chem. Theory Comput.* 8:2435–2447.
53. Ghanakota, P., and H. A. Carlson. 2016. Driving structure-based drug discovery through cosolvent molecular dynamics. *J. Med. Chem.* 59:10383–10399.
54. Ghanakota, P., and H. A. Carlson. 2016. Moving beyond active-site detection: MixMD applied to allosteric systems. *J. Phys. Chem. B.* 120:8685–8695.
55. Bakan, A., L. M. Meireles, and I. Bahar. 2011. ProDy: protein dynamics inferred from theory and experiments. *Bioinformatics.* 27:1575–1577.

56. Bakan, A., A. Dutta, ..., I. Bahar. 2014. Evol and ProDy for bridging protein sequence evolution and structural dynamics. *Bioinformatics*. 30:2681–2683.
57. Lezon, T. R., and I. Bahar. 2012. Constraints imposed by the membrane selectively guide the alternating access dynamics of the glutamate transporter GltPh. *Biophys. J.* 102:1331–1340.
58. Lomize, M. A., A. L. Lomize, ..., H. I. Mosberg. 2006. OPM: orientations of proteins in membranes database. *Bioinformatics*. 22:623–625.
59. Rotkiewicz, P., and J. Skolnick. 2008. Fast procedure for reconstruction of full-atom protein models from reduced representations. *J. Comput. Chem.* 29:1460–1465.
60. Phillips, J. C., R. Braun, ..., K. Schulten. 2005. Scalable molecular dynamics with NAMD. *J. Comput. Chem.* 26:1781–1802.
61. Páll, S., M. J. Abraham, ..., E. Lindahl. 2015. Tackling exascale software challenges in molecular dynamics simulations with GROMACS. *Solving Software Challenges for Exascale*. 8759:3–27.
62. de Jong, D. H., G. Singh, ..., S. J. Marrink. 2013. Improved parameters for the Martini coarse-grained protein force field. *J. Chem. Theory Comput.* 9:687–697.
63. Qi, Y., H. I. Ingólfsson, ..., W. Im. 2015. CHARMM-GUI Martini maker for coarse-grained simulations with the Martini force field. *J. Chem. Theory Comput.* 11:4486–4494.
64. Amadei, A., A. B. Linssen, and H. J. Berendsen. 1993. Essential dynamics of proteins. *Proteins*. 17:412–425.
65. Sayyed-Ahmad, A., and A. A. Gorfe. 2017. Mixed-probe simulation and probe-derived surface topography map analysis for ligand binding site identification. *J. Chem. Theory Comput.* 13:1851–1861.
66. Ung, P. M., P. Ghanakota, ..., H. A. Carlson. 2016. Identifying binding hot spots on protein surfaces by mixed-solvent molecular dynamics: HIV-1 protease as a test case. *Biopolymers*. 105:21–34.
67. Uehara, S., and S. Tanaka. 2017. Cosolvent-based molecular dynamics for ensemble docking: practical method for generating druggable protein conformations. *J. Chem. Inf. Model.* 57:742–756.
68. Bakan, A., A. A. Kapralov, ..., I. Bahar. 2015. Inhibition of peroxidase activity of cytochrome c: De novo compound discovery and validation. *Mol. Pharmacol.* 88:421–427.
69. Cleves, A. E., and A. N. Jain. 2015. Knowledge-guided docking: accurate prospective prediction of bound configurations of novel ligands using Surfex-Dock. *J. Comput. Aided Mol. Des.* 29:485–509.
70. Feng, Z., L. V. Pearce, ..., X. Q. Xie. 2015. Structural insight into tetrameric hTRPV1 from homology modeling, molecular docking, molecular dynamics simulation, virtual screening, and bioassay validations. *J. Chem. Inf. Model.* 55:572–588.
71. Feng, Z., M. H. Alqarni, ..., X. Q. Xie. 2014. Modeling, molecular dynamics simulation, and mutation validation for structure of cannabinoid receptor 2 based on known crystal structures of GPCRs. *J. Chem. Inf. Model.* 54:2483–2499.
72. Xie, X. Q., J. Z. Chen, and E. M. Billings. 2003. 3D structural model of the G-protein-coupled cannabinoid CB2 receptor. *Proteins*. 53:307–319.
73. Chen, J. Z., J. Wang, and X. Q. Xie. 2007. GPCR structure-based virtual screening approach for CB2 antagonist search. *J. Chem. Inf. Model.* 47:1626–1637.
74. Humphrey, W., A. Dalke, and K. Schulten. 1996. VMD: visual molecular dynamics. *J. Mol. Graph.* 14:33–38, 27–28.
75. DeLano, W. L. 2017. PyMOL. <http://www.pymol.org>.
76. Williams, T., and C. Kelley. 2017. Gnuplot 4.5: an interactive plotting program. <http://gnuplot.info>.
77. Wolfe, M. S. 2013. Toward the structure of presenilin/ $\gamma$ -secretase and presenilin homologs. *Biochim. Biophys. Acta*. 1828:2886–2897.
78. Tanzi, R. E., and L. Bertram. 2005. Twenty years of the Alzheimer's disease amyloid hypothesis: a genetic perspective. *Cell*. 120:545–555.
79. Yang, L. W., and I. Bahar. 2005. Coupling between catalytic site and collective dynamics: a requirement for mechanochemical activity of enzymes. *Structure*. 13:893–904.
80. Pozdnyakov, N., H. E. Murrey, ..., D. S. Johnson. 2013.  $\gamma$ -Secretase modulator (GSM) photoaffinity probes reveal distinct allosteric binding sites on presenilin. *J. Biol. Chem.* 288:9710–9720.
81. De Smet, F., A. Christopoulos, and P. Carmeliet. 2014. Allosteric targeting of receptor tyrosine kinases. *Nat. Biotechnol.* 32:1113–1120.
82. Nussinov, R., and C. J. Tsai. 2012. The different ways through which specificity works in orthosteric and allosteric drugs. *Curr. Pharm. Des.* 18:1311–1316.
83. Li, X., S. Dang, ..., Y. Shi. 2013. Structure of a presenilin family intramembrane aspartate protease. *Nature*. 493:56–61.



**Biophysical Journal, Volume 113**

**Supplemental Information**

**Allosteric Modulation of Intact  $\gamma$ -Secretase Structural Dynamics**

**Ji Young Lee, Zhiwei Feng, Xiang-Qun Xie, and Ivet Bahar**

# Supplemental Methods

## *Analysis of Collective Modes using the Elastic Network Models ANM*

In the ANM, the protein is represented as a network where residues serve as the nodes, the positions of which are identified by those of  $\alpha$ -carbons, and the overall potential is represented as the sum of harmonic potentials between interacting nodes ( $C^\alpha-C^\alpha < 15\text{\AA}$ ) (1). The force constants for the  $3N \times 3N$  interactions (for  $N$  residues in  $3D$ ) are given by the elements of the Hessian matrix  $\mathbf{H}$ . The inverse  $\mathbf{H}^{-1}$  is proportional to the covariance of residue fluctuations away from their mean position. To achieve a conformation displaced along one of the ANM modes, we use the following equation:  $\mathbf{R}^{(k)} = \mathbf{R}^{(0)} \pm s\lambda_k^{-1/2} \mathbf{u}_k$ , where  $\mathbf{R}^{(0)}$  is a  $3N$ -dimensional vector representing initial coordinates,  $\lambda_k$  is eigenvalue, and  $\mathbf{u}_k$  is corresponding eigenvectors. We choose  $s$  where ANM conformers deviates by an RMSD of 4  $\text{\AA}$  from the initial structure (in [Figs. 2, 5, 8, S4, and S6](#)).

We used structure of  $\gamma$ -secretase (PDB ID 5FN2) (2) which has total 1309 residues and built membrane using an FCC lattice with a distance of 6.2  $\text{\AA}$  between nearest neighbors with 7 layers and a circular shape with 80  $\text{\AA}$  radius from the center of the protein (total 3108 nodes for membrane). The protein was positioned into membrane using Orientations of Proteins in Membrane (OPM) database (3). Our system has total 4417 nodes ( $N=4417$ ) and  $3N-6$  (13245) modes form a complete basis set for all possible motions of the  $3N$ -dimensional structure. The ANM calculation of  $\gamma$ -secretase in the absence of membrane in [Fig. 1D](#) uses only protein structure ( $N=1309$ ). All computations were performed using the ProDy API (4,5).

PULCHRA version 3.04 program (6) was used to add all backbone and side chain atoms to the conformers generated by the ANM. Energy-minimization was performed using NAMD for 2,000 steps.

## *Coarse-grained Molecular Dynamics Simulations*

The coarse-grained system of  $\gamma$ -secretase (PDB ID 5FN2) (2) and lipid bilayer and MD set-up was prepared using GHARMM-GUI Martini bilayer maker (7), and simulations were performed using GROMACS version 5.1.4 (8) with MARTINI force field v2.2 (9). All the systems were relaxed using equilibration steps, and two independent NPT simulations were performed for 10  $\mu\text{s}$  each with 20 fs time step. The temperature was set to 310 K using V-rescale coupling, and the pressure was set to 1.0 bar using semi-isotropic Parrinello-Rahman coupling. The system has 1,309 residues, 414 POPC lipid sites, 13,355 water molecules, 155  $\text{Na}^+$  ions, and 150  $\text{Cl}^-$  ions, i.e. a total of 21,561CG sites simulated in a 130  $\text{\AA}$  x 130  $\text{\AA}$  x 150  $\text{\AA}$  box.

## ***Principal Component Analysis (PCA) of MD Trajectories***

The principal component analysis using MD snapshots or experimental structures was used to extract principal changes in structure (4,10). Principal modes were obtained by decomposing the covariance matrix  $\mathbf{C}$  for each dataset as  $\mathbf{C} = \sum_{i=1}^{3N} \sigma_i \mathbf{P}^{(i)} \mathbf{P}^{(i)T}$  where  $\mathbf{P}^{(i)}$  and  $\sigma_i$  are the respective  $i$ th eigenvalue and eigenvector of  $\mathbf{C}$ ,  $\sigma_i$  corresponding to the largest variance component. The fractional contribution of the principal component (eigenvector)  $\mathbf{P}^{(i)}$  to structural variance in the dataset is given by  $f_i = \sigma_i / \sum_j \sigma_j$  where the summation is performed over all components (note that  $\sigma_i$  is equivalent to  $1/\lambda_i$  obtained from ANM). All computations were performed using the ProDy API (4,5).

## ***Druggability Simulations and Trajectory Analysis***

All atom MD systems and set-up were prepared using DruGUI (11) in VMD (12). We performed 3 independent simulations of intact  $\gamma$ -secretase (PDB ID 5FN2) including probe molecules in a water box. Our system has 25,600 water and 1,280 probe molecules, which gives a ratio of 20 water molecules per probe molecule as used in our previous study (11). The probe molecules were evenly distributed in the box. We included four different probe molecules, 896 isopropanol (70%), 128 isopropylamine (10%), 128 acetate (10%), and 128 acetamide (10%) molecules. The system contained a total of 112,132 atoms of protein, probes, waters, and ions. MD simulations were performed using NAMD (13), and we relaxed the systems using equilibration steps and performed NPT dynamics for 40 ns for each (total 120 ns) with 2 fs time step. Nosé-Hoover constant pressure (1 bar) and temperature (300 K) were used. We also performed 5 independent all atom MD simulations including probe molecules for the PS1 subunit of  $\gamma$ -secretase (PDB ID 5FN2). This system includes 252 isopropanol (70%), 36 isopropylamine (10%), 36 acetate (10%), 36 acetamide (10%), and 7200 water molecules. Other simulation setups are same as in intact protein.

For trajectory analysis, all MD snapshots were superposed onto the reference PDB structure of the protein using  $C^\alpha$  atoms and a cubical grid-based representation of the space. Grid edge size was set to 0.5 Å. Probe molecules having a nonhydrogen atom within 2.5 Å from protein atoms were considered to interact with the protein. For each probe type, the individual occupancy of grids was calculated using their central carbon atoms. We obtain occupancy of each probe for a given voxel. High occupancy voxels, called hot spots, within a distance less than 5.5 Å were merged and druggable sites were defined upon merger of at least 6 hot spots. More details are available in our previous study (11) as well as ProDy tutorial. All computations were performed using DruGUI in the ProDy API (4,5).

## ***Docking of Small Molecules***

The PDB structure of  $\gamma$ -secretase (2) was used as target for docking  $\gamma$ -secretase ligands, including DAPT, BMS-708163, ChEMBL2159511, ChEMBL2159687 and ChEMBL2159691, and  $\gamma$ -

secretase modulators of E2012 and ST1120. Also, the closed ANM conformers along mode 1 (**Fig. 5**), mode 7 (**Fig. S4**), and mode 14, and the open conformer along ANM mode 14 (**Fig. 8**) were used as targets. Surflex-Dock, a docking program implemented in SYBYL-X 1.3, was used to generate detailed receptor-ligands interactions. We used the same protocol for docking as reported in our previous publications (14-17). Briefly, **(A)** energy minimizations of 3D structure of  $\gamma$ -secretase was performed using SYBYL-X 1.3. The parameters defined in the SYBYL were as follows: Gradient was set to 0.5 kcal/mol, max iterations were set to 5000, force field was selected as MMFF94s, and that for the charges was MMFF94. **(B)** The putative binding cavity of  $\gamma$ -secretase was predicted and generated using SYBYL-X 1.3 by a similar protocol, with the Threshold set to 0.50 while the Bloat was set to 0. **(C)** The following docking parameters were used. (a) The number of starting conformations per ligand was set to 10; max conformations per fragment was set to 20, (b) maximum number of rotatable bonds per molecule was 100, (c) the flags were turned on at pre-dock minimization, post-dock minimization, molecule fragmentation, soft grid treatment, (d) activate spin alignment method with density of search was set to 9.0, and (e) number of spins per alignment was set to 12. **(D)** Result optimizations were carried out by allowing the protein movements with both hydrogen and heavy atoms.

## REFERENCES

1. Atilgan, A. R., S. R. Durell, R. L. Jernigan, M. C. Demirel, O. Keskin, and I. Bahar. 2001. Anisotropy of fluctuation dynamics of proteins with an elastic network model. *Biophys. J.* 80:505-515.
2. Bai, X. C., E. Rajendra, G. H. Yang, Y. G. Shi, and S. H. W. Scheres. 2015. Sampling the conformational space of the catalytic subunit of human  $\gamma$ -secretase. *Elife* 4.
3. Lomize, M. A., A. L. Lomize, I. D. Pogozheva, and H. I. Mosberg. 2006. OPM: orientations of proteins in membranes database. *Bioinformatics* 22:623-625.
4. Bakan, A., L. M. Meireles, and I. Bahar. 2011. ProDy: protein dynamics inferred from theory and experiments. *Bioinformatics* 27:1575-1577.
5. Bakan, A., A. Dutta, W. Mao, Y. Liu, C. Chennubhotla, T. R. Lezon, and I. Bahar. 2014. Evol and ProDy for bridging protein sequence evolution and structural dynamics. *Bioinformatics* 30:2681-2683.
6. Rotkiewicz, P. and J. Skolnick. 2008. Fast procedure for reconstruction of full-atom protein models from reduced representations. *J. Comput Chem.* 29:1460-1465.
7. Qi, Y., H. I. Ingolfsson, X. Cheng, J. Lee, S. J. Marrink, and W. Im. 2015. CHARMM-GUI Martini maker for coarse-grained simulations with the Martini force field. *J. Chem. Theory Comput* 11:4486-4494.

8. Szilárd Páll, Mark James Abraham, Carsten Kutzner, Berk Hess, and Erik Lindahl. 2015. Tackling exascale software challenges in molecular dynamics simulations with GROMACS. *Solving Software Challenges for Exascale* 8759:3-27.
9. de Jong, D. H., G. Singh, W. F. Bennett, C. Arnarez, T. A. Wassenaar, L. V. Schafer, X. Periole, D. P. Tieleman, and S. J. Marrink. 2013. Improved parameters for the Martini coarse-grained protein force field. *J. Chem. Theory Comput* 9:687-697.
10. Amadei, A., A. B. Linssen, and H. J. Berendsen. 1993. Essential dynamics of proteins. *Proteins* 17:412-425.
11. Bakan, A., N. Nevins, A. S. Lakdawala, and I. Bahar. 2012. Druggability assessment of allosteric proteins by dynamics simulations in the presence of probe molecules. *Journal of Chemical Theory and Computation* 8:2435-2447.
12. Humphrey, W., A. Dalke, and K. Schulten. 1996. VMD: visual molecular dynamics. *J. Mol. Graph.* 14:33-38.
13. Phillips, J. C., R. Braun, W. Wang, J. Gumbart, E. Tajkhorshid, E. Villa, C. Chipot, R. D. Skeel, L. Kale, and K. Schulten. 2005. Scalable molecular dynamics with NAMD. *J. Comput Chem.* 26:1781-1802.
14. Feng, Z., M. H. Alqarni, P. Yang, Q. Tong, A. Chowdhury, L. Wang, and X. Q. Xie. 2014. Modeling, molecular dynamics simulation, and mutation validation for structure of cannabinoid receptor 2 based on known crystal structures of GPCRs. *J. Chem. Inf. Model.* 54:2483-2499.
15. Feng, Z., L. V. Pearce, X. Xu, X. Yang, P. Yang, P. M. Blumberg, and X. Q. Xie. 2015. Structural insight into tetrameric hTRPV1 from homology modeling, molecular docking, molecular dynamics simulation, virtual screening, and bioassay validations. *J. Chem. Inf. Model.* 55:572-588.
16. Xie, X. Q., J. Z. Chen, and E. M. Billings. 2003. 3D structural model of the G-protein-coupled cannabinoid CB2 receptor. *Proteins* 53:307-319.
17. Chen, J. Z., J. Wang, and X. Q. Xie. 2007. GPCR structure-based virtual screening approach for CB2 antagonist search. *J. Chem. Inf. Model.* 47:1626-1637.

## Supplemental Figures

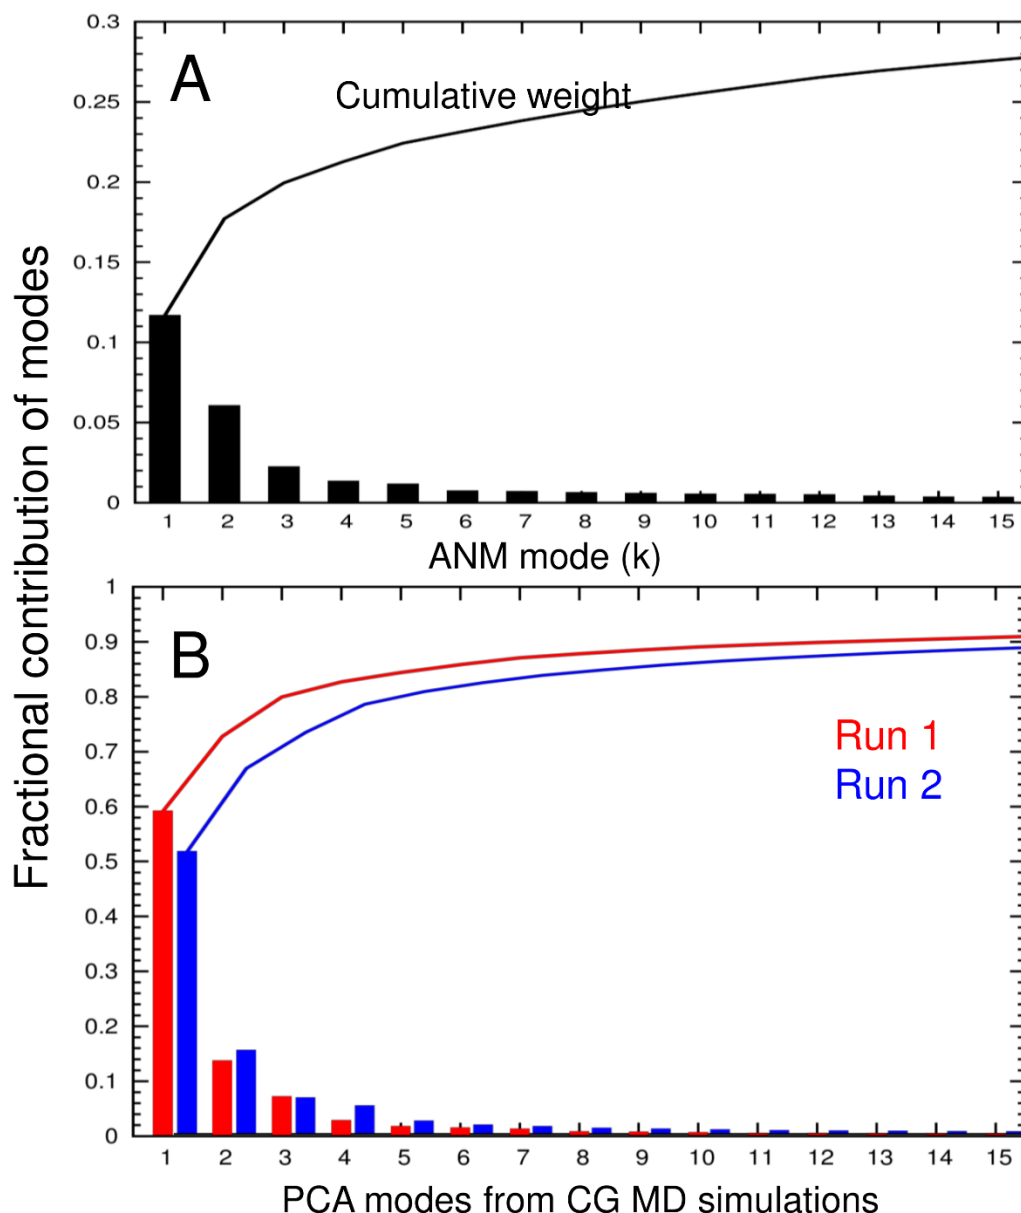

**Figure S1. Eigenvalue spectrum obtained by ANM analysis and PCA of two CG MD trajectories generated for  $\gamma$ -secretase complex. (A)** Inverse eigenvalues plotted against ANM mode index. The bar values are  $(1/\lambda_k) / \Sigma(1/\lambda_k)$ , where  $k$  is mode number,  $\lambda_k$  is eigenvalue of mode  $k$ , and  $\Sigma$  is summation over all modes (total of  $3N-6$  modes,  $N$  is 1309,  $\gamma$ -secretase residue numbers, using the system-environment method in ProDy). The cumulative contribution summed over all modes is shown. **(B)** Same distribution obtained from PCA of the covariance generated from CG MD runs 1 and 2.

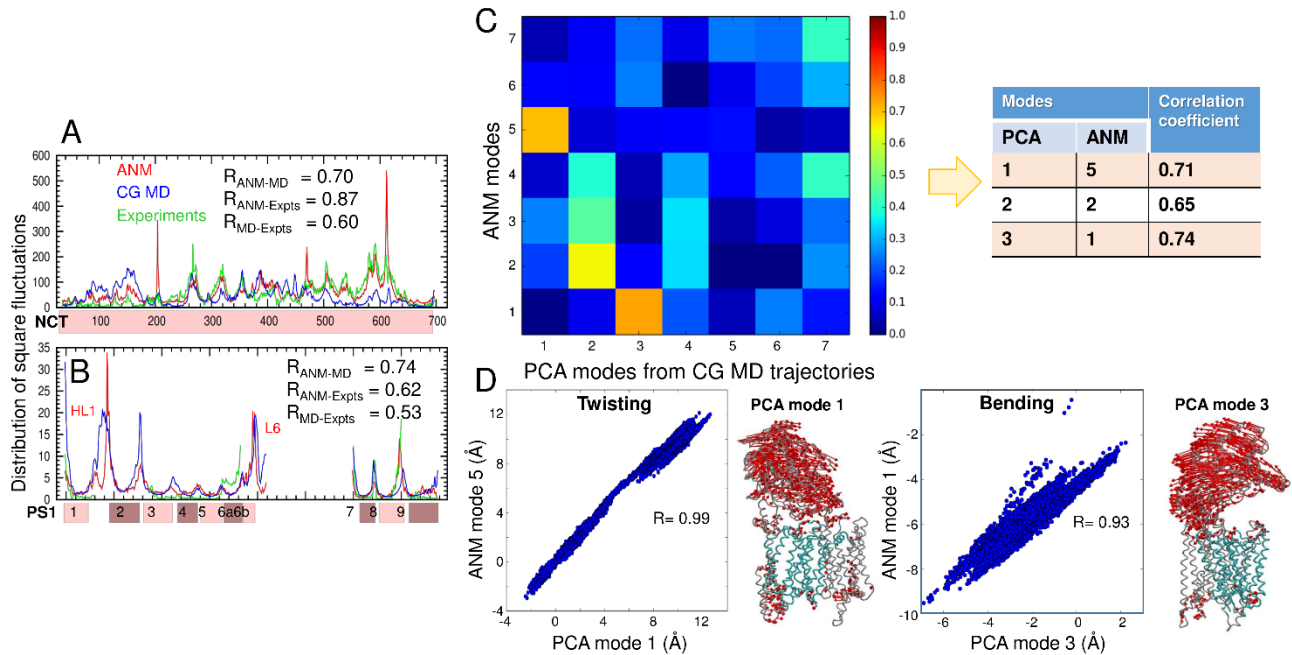

**Figure S2. Mobility of  $\gamma$ -secretase observed in CG MD simulations.** The panels represent the same properties, as in Fig. 3, but we displayed here the results from the 2<sup>nd</sup> CG MD run.

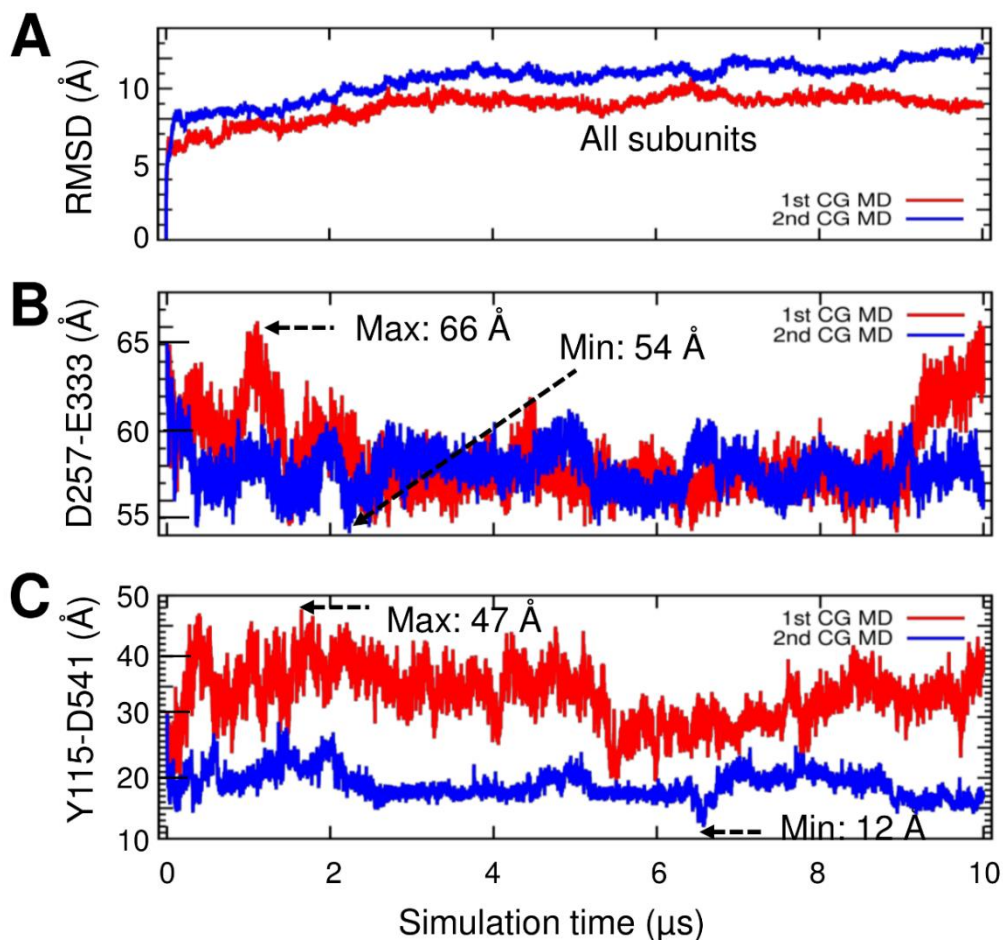

**Figure S3. Mobility of NCT with respect to PS1 in CG MD simulations.** (A) RMSD of whole protein including the four subunits for two independent 10  $\mu\text{s}$  simulations. 1<sup>st</sup> and 2<sup>nd</sup> simulations are in *red* and *blue* lines, respectively. (B) Time evolution of the distance between D257(PS1) and E333(NCT). (C) Time evolution of the distance between Y115(PS1) and D541(NCT). Maximum and minimum distances are indicated by arrows in both panels (B) and (C).



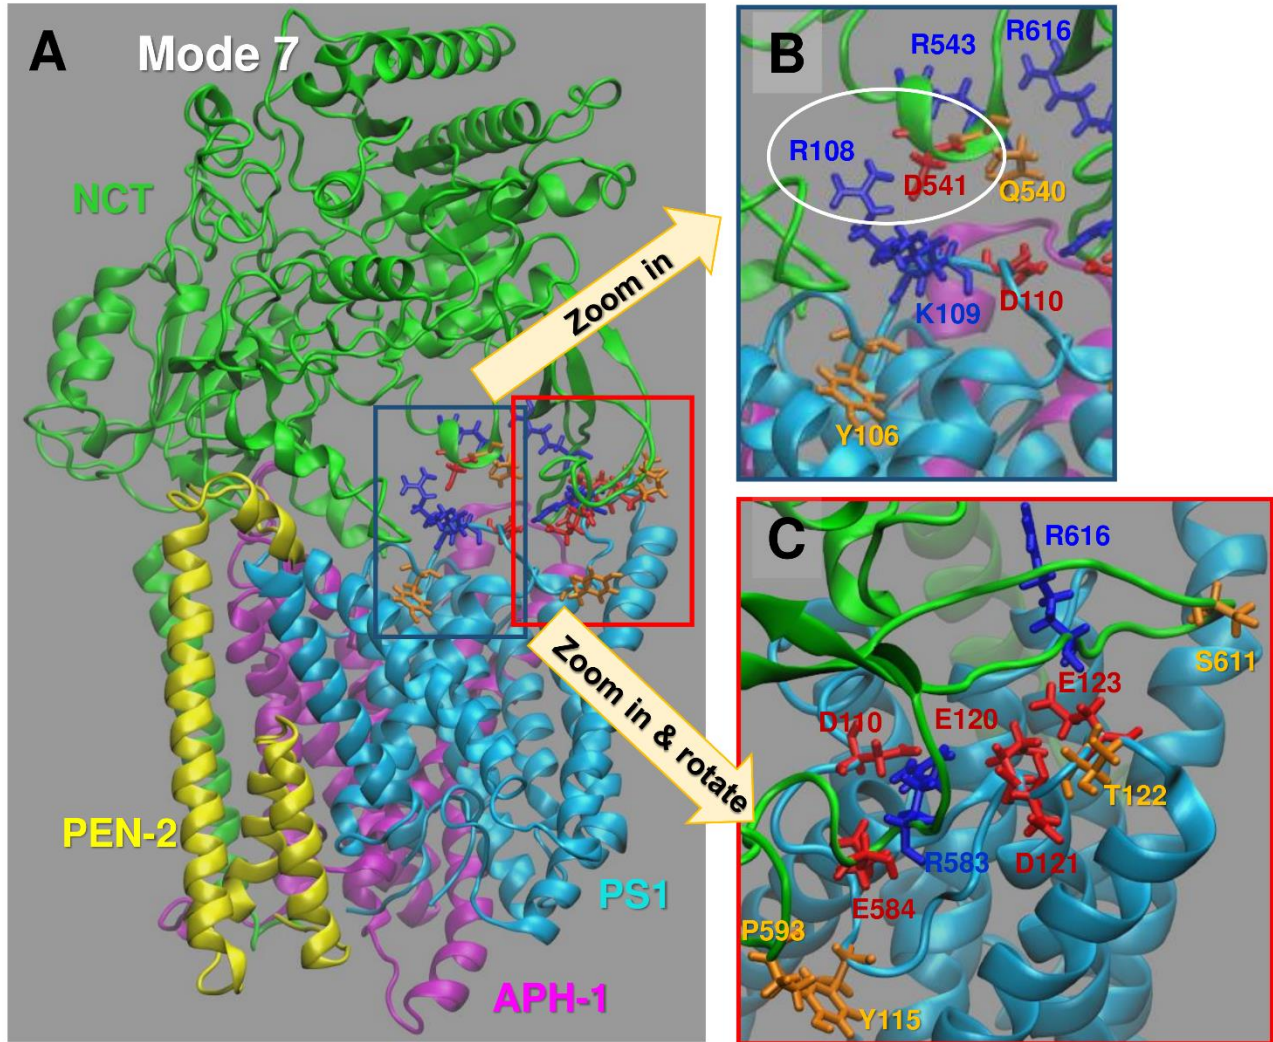

**Figure S4.** NCT and PS1 residues distinguished by their high mobility make intersubunit contacts facilitated by the global bending mode of the complex. **(A)** Closed form attainable upon reconfiguration of the complex along ANM mode 7. The size of the motion along mode 7 has been selected to yield an RMSD of 4 Å from the initial structure. Residues Q540, D541, R543, R583, E584, P593, S611, and R616 in NCT, and Y106, R108, K109, D110, Y115, E120, D121, T122, and E123 in the hydrophilic loop HL1 of PS1 are shown in *sticks* colored *red* (negatively charged), *blue* (positively charged), or *orange* (polar). We note the inter-subunit salt bridge D541-R108 (encircled in **B**). See also **Fig. 2** and **Table S1** for inter-residue and inter-atomic distances in the closed form.

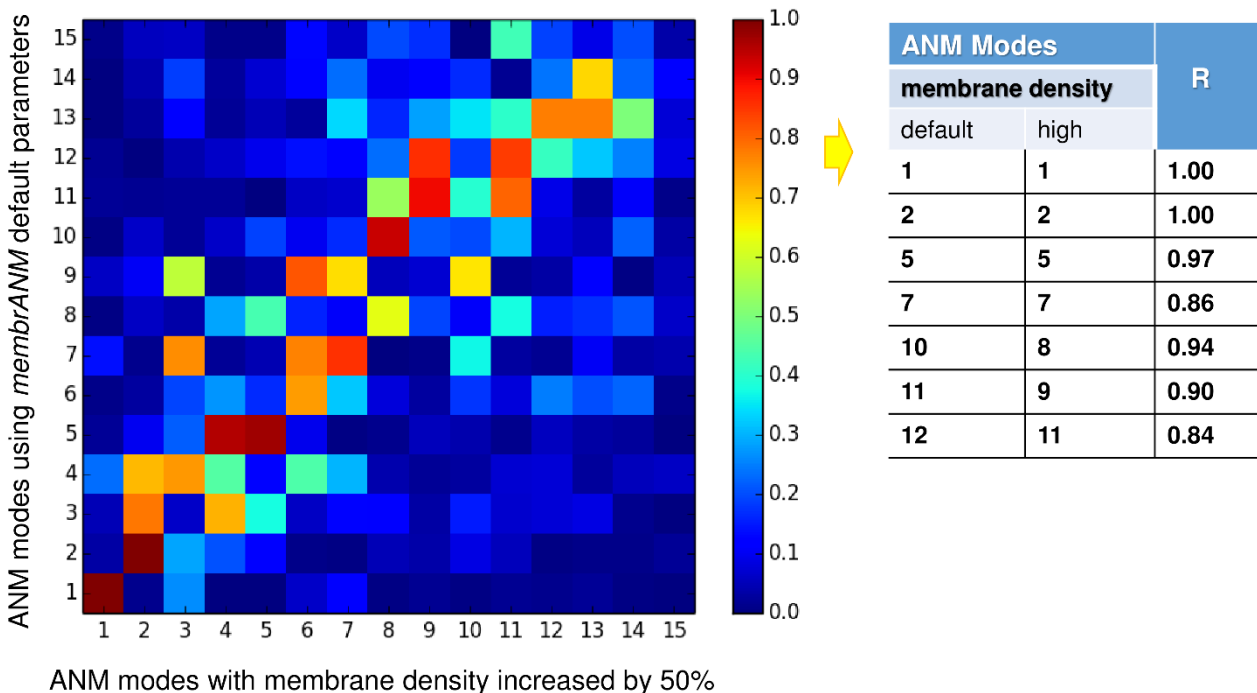

**Figure S5. Comparison of the soft modes obtained for  $\gamma$ -secretase-membrane system using two different densities for the lipid bilayer.** The ordinate refers to the original membrANM modes, obtained with default parameters in ProDy. The abscissa are the results obtaining by building a denser network model for the membrane (using 50% more network nodes). The diagram shows the correlation between the two sets of ANM modes, after taking the absolute values of the eigenvectors (as both directions of fluctuations are equivalent). The table on the right lists the correlation coefficients between selected pairs, the high density referring to the abscissa of the correlation map.

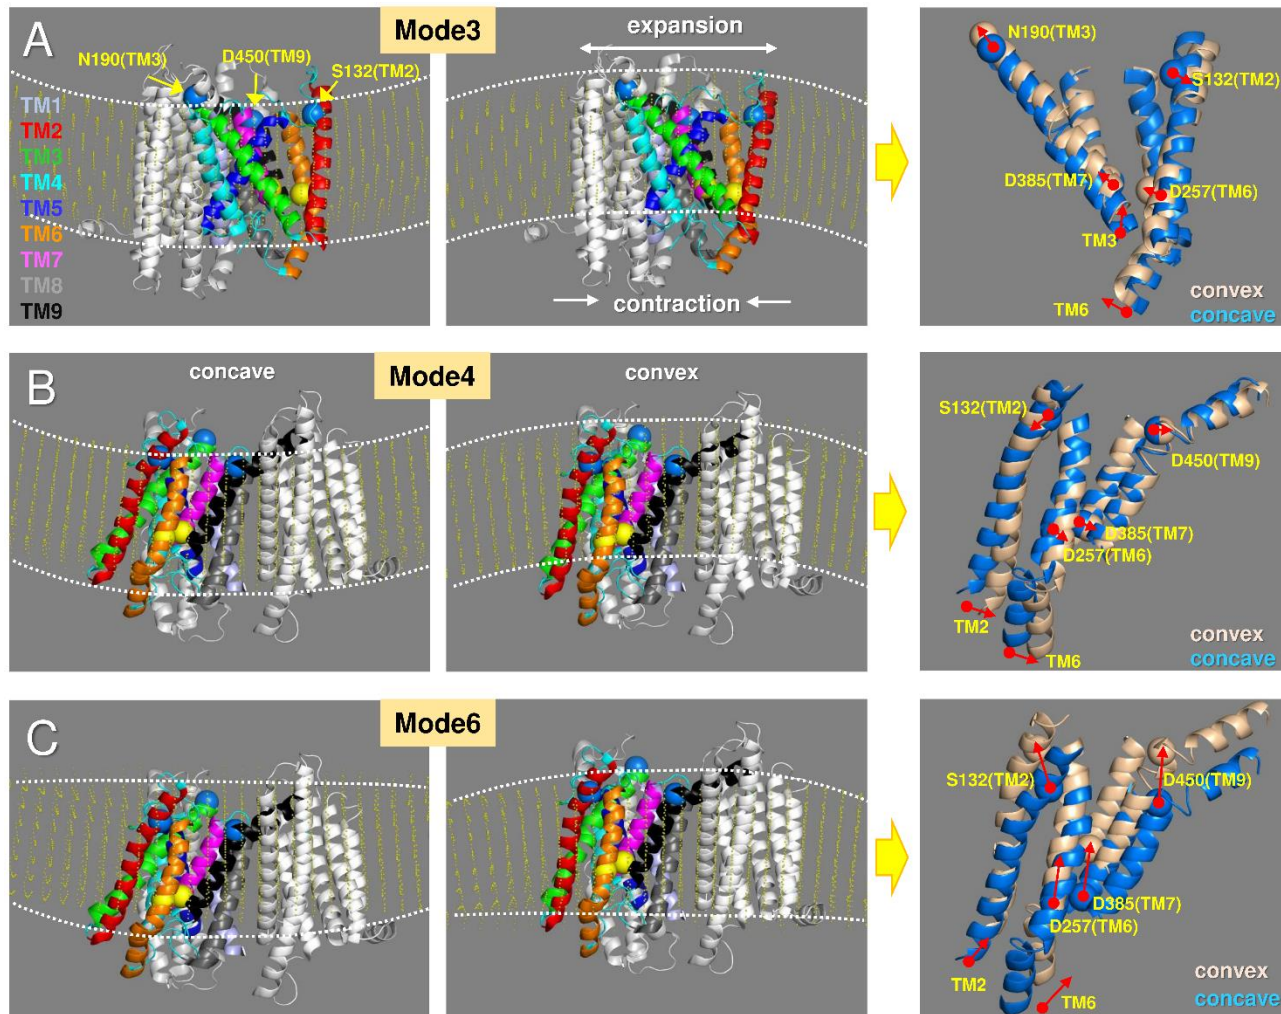

**Figure S6.** Motions of PS1 predicted by *membrANM* analysis of the intact protein. **(A-C)** Pair of conformers sampled during the motion of ANM modes 3, 4, and 6. Two ANM conformers which deviate by a preset RMSD of 4 Å from the initial structure are shown in each case. Modes 4 and 6 are shown from the same perspective; mode 3 is shown from a different perspective. We display APH-1 and PEN-2 in *silver*, the membrane in *yellow*, the PS1 TMs in different colors (NCT is not shown here). D257 and D385 in PS1 are shown in *yellow* spheres, S132 (TM2), N190 (TM3), and D450 (TM9) in *blue* spheres. On the *right* panels in each row, we display the superposition of the two conformers in different colors. For clarity, we included four TMs (TM2, TM3, TM6, and TM7 in mode 3 and TM2, TM6, TM7, and TM9 in modes 4 and 6). *Red arrows* indicate movements from concave to convex states for selected residues or TM helices. ANM mode 4 induces an opening at the EC-facing region but it is along an orthogonal radial direction such that it results in a change in TM2-TM9 distance. ANM mode 6 induces a vertical movement, in contrast to the previous two modes that induce radial displacements. We observe displacements in TM2, TM6 and TM9.

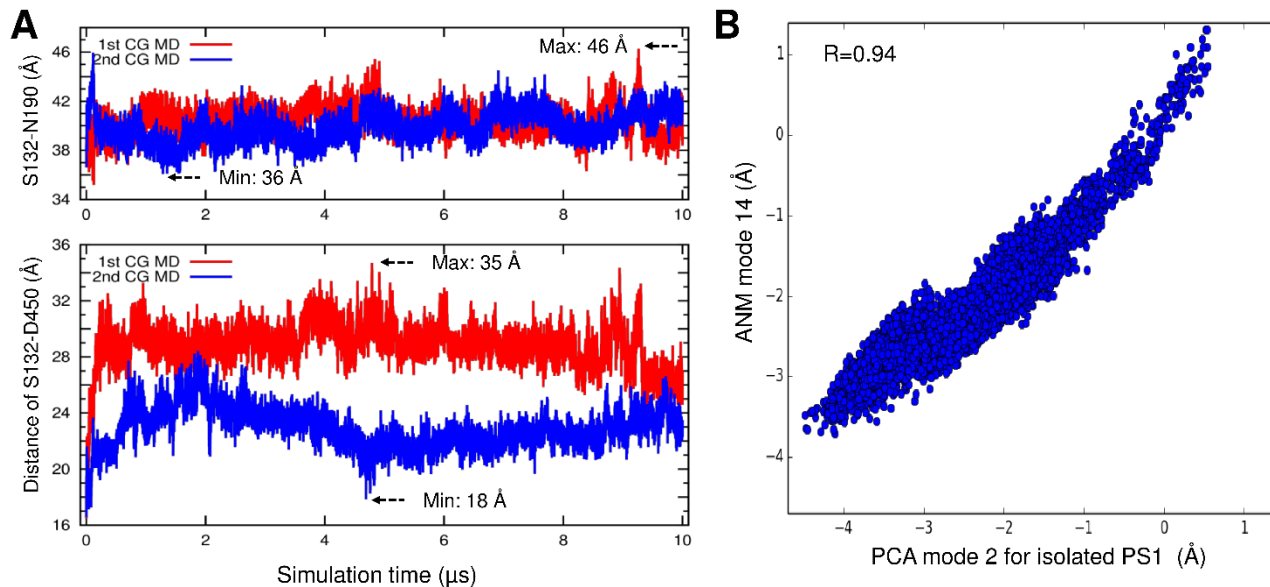

**Figure S7. Mobility of PS1 in CG MD simulations.** (A) Distances of the S132-N190 (*upper panel*) and S132-D450 (*lower panel*) are shown for two independent 10  $\mu\text{s}$  simulations. The distances of 1<sup>st</sup> and 2<sup>nd</sup> simulations are in *red* and *blue lines*, respectively. From the two simulations, the maximum and minimum distances were indicated with *arrows*. (B) Projections of the 10,000 frames from the 2<sup>nd</sup> 10  $\mu\text{s}$  trajectory onto the ANM mode 14 and PCA mode 2 directions.

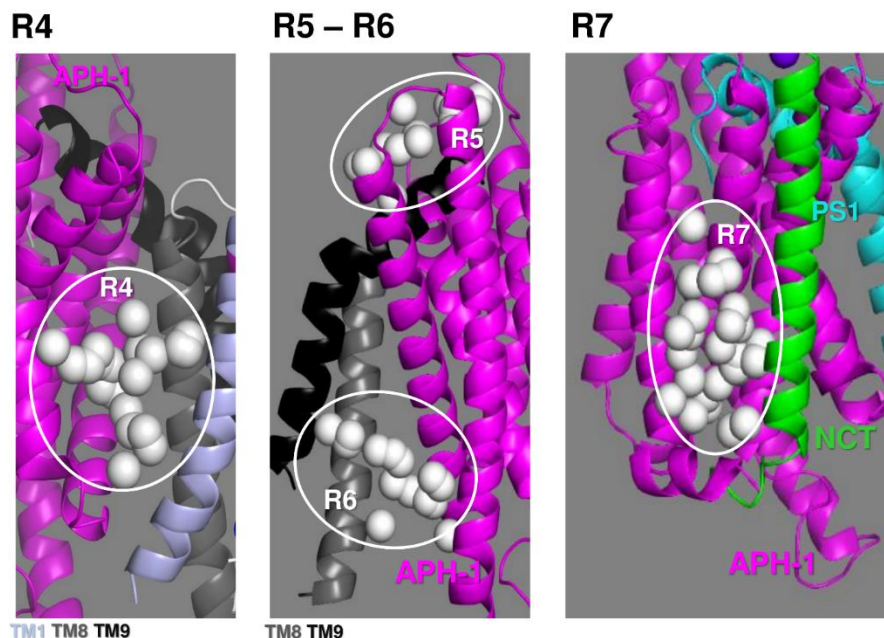

**Figure S8. Druggable sites identified at APH-1 interfacial regions.** Druggable regions R4-R7 were deduced from druggability simulations performed for the intact protein. White spheres are druggable hot spots, circled and labeled as R4-R7. R4-R6 are at the interface between PS1 and APH-1 (APH-1 is shown in *magenta* and TM helices in PS1 are colored as in **Fig. 9**). R7 is at the interface between APH-1 and NCT TM helix (*green*). Each panel shows the close vicinity of the druggable sites.

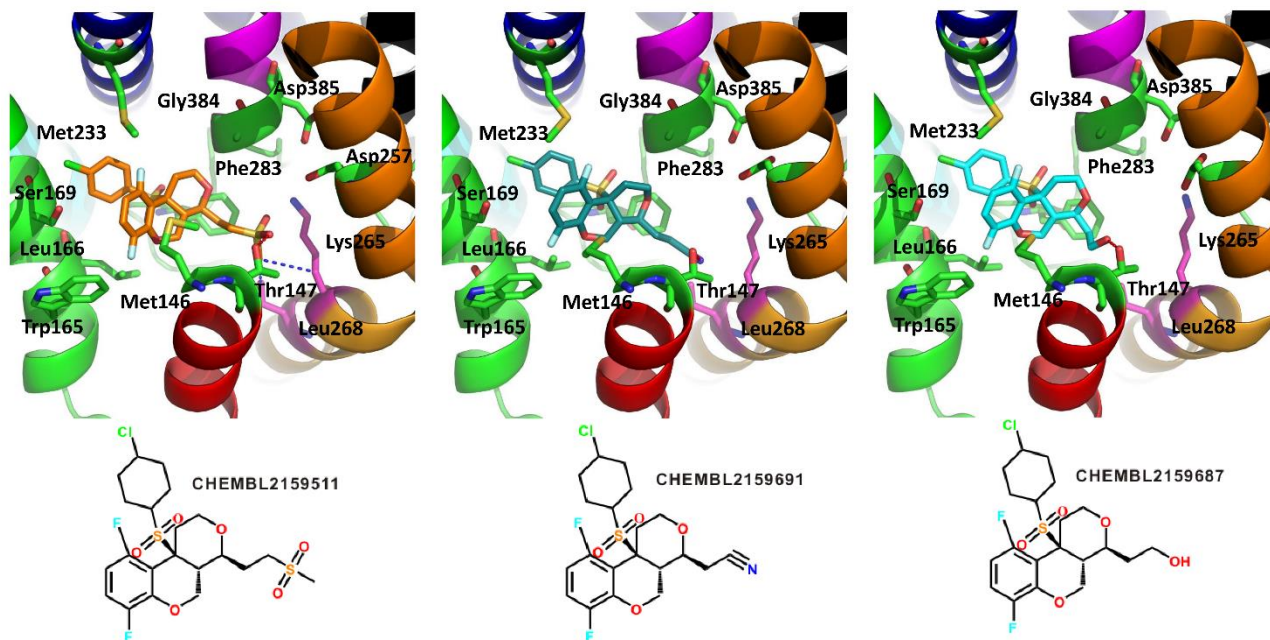

**Figure S9.** Detailed interactions between PS1 and three other drugs. Trp165, Leu166 and Met233 interact with the fluorine on the aromatic ring. Hydrophobic interactions take place between the Met146 and Phe283. Thr147 forms a hydrogen bond with (methylsulfonyl)ethane, acetonitrile, and ethanol, respectively.

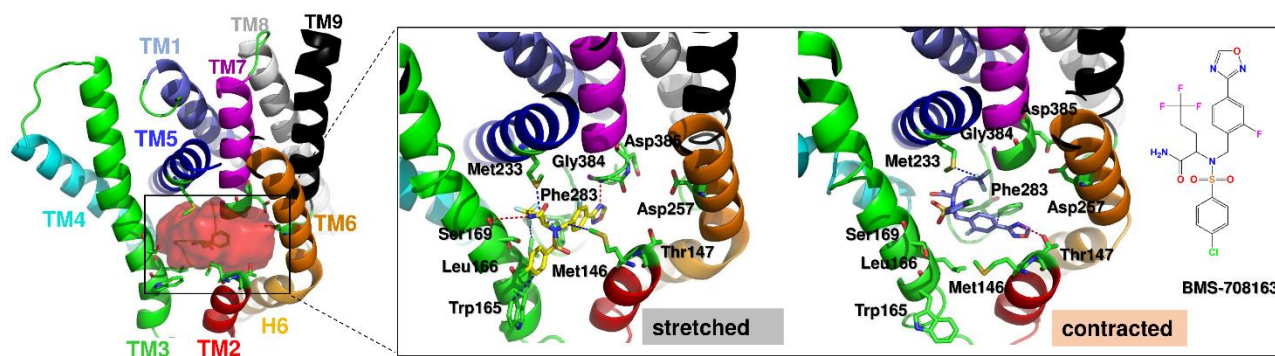

**Figure S10.** Dependency of the interactions between PS1 and its inhibitor (BMS-708163) on structural changes driven by ANM mode 4. The inhibitor binds to the orthosteric site (site R1 in Fig. 9A). Binding poses to the stretched and contracted forms are shown. The inhibitor shows a higher affinity to bind the stretched conformer.

# Supplemental Tables

**Table S1. Intersubunit distances between NCT and PS1 HL1 residue pairs that undergo intersubunit contacts facilitated by the global bending mode of the complex (\*)**

| A                                                                                                       |        |        |            | B                                   |        |     |        | C                                                                                                       |       |        |            | D                                   |        |     |        |     |       |
|---------------------------------------------------------------------------------------------------------|--------|--------|------------|-------------------------------------|--------|-----|--------|---------------------------------------------------------------------------------------------------------|-------|--------|------------|-------------------------------------|--------|-----|--------|-----|-------|
| Mode 1: C <sup>α</sup> -C <sup>α</sup> distances (Å) between NCT and PS1 (closed state distances < 9 Å) |        |        |            | Atomic interactions closer than 4 Å |        |     |        | Mode 7: C <sup>α</sup> -C <sup>α</sup> distances (Å) between NCT and PS1 (closed state distances < 9 Å) |       |        |            | Atomic interactions closer than 4 Å |        |     |        |     |       |
| NCT                                                                                                     | PS1    | closed | open (PDB) |                                     |        |     |        | NCT                                                                                                     | PS1   | closed | open (PDB) |                                     |        |     |        |     |       |
| ASP541                                                                                                  | THR122 | 3.908  | 15.077     |                                     | ASP541 | CA  | THR122 | OG1                                                                                                     | 3.825 |        |            |                                     | ARG583 | CD  | THR119 | OG1 | 3.189 |
| ASP541                                                                                                  | ASP121 | 5.257  | 16.886     | →                                   | ASP541 | N   | THR122 | OG1                                                                                                     | 3.631 |        |            |                                     | ARG583 | CD  | THR119 | O   | 3.644 |
| GLN540                                                                                                  | THR122 | 5.350  | 16.531     |                                     | ASP541 | CA  | ASP121 | C                                                                                                       | 3.973 |        |            |                                     | ARG583 | CZ  | THR119 | OG1 | 2.904 |
| ARG543                                                                                                  | THR122 | 6.861  | 18.243     |                                     | ASP541 | CA  | ASP121 | O                                                                                                       | 3.643 |        |            |                                     | ARG583 | NE  | THR119 | OG1 | 2.969 |
| ASP541                                                                                                  | GLU123 | 6.880  | 17.275     |                                     | ASP541 | CB  | ASP121 | O                                                                                                       | 3.716 |        |            |                                     | ARG583 | NH1 | THR119 | OG1 | 3.107 |
| LEU542                                                                                                  | THR122 | 7.073  | 18.154     |                                     | ASP541 | O   | ASP121 | O                                                                                                       | 3.579 |        |            |                                     | ARG583 | NH2 | THR119 | OG1 | 3.430 |
| SER544                                                                                                  | THR122 | 7.283  | 17.290     |                                     | GLN540 | CA  | THR122 | OG1                                                                                                     | 3.969 |        |            |                                     | ASP615 | CA  | GLU123 | OE2 | 3.733 |
| GLN540                                                                                                  | ASP121 | 7.565  | 18.775     |                                     | GLN540 | CB  | THR122 | OG1                                                                                                     | 3.948 |        |            |                                     | ASP615 | C   | GLU123 | OE2 | 3.603 |
| SER544                                                                                                  | GLU123 | 8.125  | 18.534     |                                     | GLN540 | CD  | THR122 | OG1                                                                                                     | 3.196 |        |            |                                     | ASP615 | CB  | GLU123 | CG  | 3.980 |
| GLN540                                                                                                  | GLU123 | 8.324  | 18.860     |                                     | GLN540 | CG  | THR122 | OG1                                                                                                     | 3.104 |        |            |                                     | ASP615 | CB  | GLU123 | OE2 | 3.394 |
| ASP541                                                                                                  | GLU120 | 8.369  | 18.871     |                                     | GLN540 | C   | THR122 | OG1                                                                                                     | 3.116 |        |            |                                     | ASP615 | CG  | GLU123 | OE2 | 3.943 |
| ARG539                                                                                                  | THR122 | 8.697  | 19.720     |                                     | GLN540 | NE2 | THR122 | OG1                                                                                                     | 3.791 |        |            |                                     | ASP541 | CA  | ARG108 | NH2 | 3.869 |
| ARG543                                                                                                  | GLU123 | 8.901  | 19.927     |                                     | GLN540 | OE1 | THR122 | CG2                                                                                                     | 3.800 |        |            |                                     | ASP541 | C   | ARG108 | NH2 | 3.823 |
| GLN540                                                                                                  | THR124 | 8.970  | 20.558     |                                     | GLN540 | OE1 | THR122 | OG1                                                                                                     | 3.488 |        |            |                                     | ASP541 | CB  | ARG108 | NH2 | 3.461 |
|                                                                                                         |        |        |            |                                     | GLN540 | O   | THR122 | CA                                                                                                      | 3.783 |        |            |                                     | ASP541 | CG  | ARG108 | CZ  | 3.573 |
|                                                                                                         |        |        |            |                                     | GLN540 | O   | THR122 | CB                                                                                                      | 3.338 |        |            |                                     | ASP541 | CG  | ARG108 | NE  | 3.290 |
|                                                                                                         |        |        |            |                                     | GLN540 | O   | THR122 | CG2                                                                                                     | 3.135 |        |            |                                     | ASP541 | CG  | ARG108 | NH2 | 2.969 |
|                                                                                                         |        |        |            |                                     | GLN540 | O   | THR122 | OG1                                                                                                     | 2.659 |        |            |                                     | ASP541 | O   | ARG108 | NH2 | 3.037 |
|                                                                                                         |        |        |            |                                     |        |     |        |                                                                                                         |       |        |            |                                     | ASP541 | OD1 | ARG108 | CZ  | 3.334 |
|                                                                                                         |        |        |            |                                     | ARG543 | CZ  | THR122 | CG2                                                                                                     | 3.821 |        |            |                                     | ASP541 | OD1 | ARG108 | NE  | 2.906 |
|                                                                                                         |        |        |            |                                     | ARG543 | NE  | THR122 | CG2                                                                                                     | 3.473 |        |            |                                     | ASP541 | OD1 | ARG108 | NH2 | 2.906 |
|                                                                                                         |        |        |            |                                     | ARG543 | NH2 | THR122 | CG2                                                                                                     | 3.402 |        |            |                                     | ASP541 | OD2 | ARG108 | CB  | 3.932 |
|                                                                                                         |        |        |            |                                     | ARG543 | NH2 | THR122 | O                                                                                                       | 3.774 |        |            |                                     | ASP541 | OD2 | ARG108 | CZ  | 3.521 |
|                                                                                                         |        |        |            |                                     |        |     |        |                                                                                                         |       |        |            |                                     | ASP541 | OD2 | ARG108 | NE  | 3.090 |
|                                                                                                         |        |        |            |                                     |        |     |        |                                                                                                         |       |        |            |                                     | ASP541 | OD2 | ARG108 | NH2 | 3.219 |
|                                                                                                         |        |        |            |                                     |        |     |        |                                                                                                         |       |        |            |                                     | GLU584 | CG  | PRO117 | O   | 3.777 |
|                                                                                                         |        |        |            |                                     |        |     |        |                                                                                                         |       |        |            |                                     | GLU584 | N   | PRO117 | O   | 3.772 |
|                                                                                                         |        |        |            |                                     |        |     |        |                                                                                                         |       |        |            |                                     | ARG616 | CA  | GLU123 | OE2 | 3.476 |
|                                                                                                         |        |        |            |                                     |        |     |        |                                                                                                         |       |        |            |                                     | ARG616 | C   | GLU123 | CB  | 3.986 |
|                                                                                                         |        |        |            |                                     |        |     |        |                                                                                                         |       |        |            |                                     | ARG616 | C   | GLU123 | CD  | 3.645 |
|                                                                                                         |        |        |            |                                     |        |     |        |                                                                                                         |       |        |            |                                     | ARG616 | C   | GLU123 | OE1 | 3.913 |
|                                                                                                         |        |        |            |                                     |        |     |        |                                                                                                         |       |        |            |                                     | ARG616 | C   | GLU123 | OE2 | 3.482 |
|                                                                                                         |        |        |            |                                     |        |     |        |                                                                                                         |       |        |            |                                     | ARG616 | N   | GLU123 | CD  | 3.611 |
|                                                                                                         |        |        |            |                                     |        |     |        |                                                                                                         |       |        |            |                                     | ARG616 | N   | GLU123 | OE2 | 2.667 |
|                                                                                                         |        |        |            |                                     |        |     |        |                                                                                                         |       |        |            |                                     | ARG616 | O   | GLU123 | CB  | 3.014 |
|                                                                                                         |        |        |            |                                     |        |     |        |                                                                                                         |       |        |            |                                     | ARG616 | O   | GLU123 | CD  | 3.457 |
|                                                                                                         |        |        |            |                                     |        |     |        |                                                                                                         |       |        |            |                                     | ARG616 | O   | GLU123 | CG  | 3.761 |
|                                                                                                         |        |        |            |                                     |        |     |        |                                                                                                         |       |        |            |                                     | ARG616 | O   | GLU123 | OE1 | 3.847 |
|                                                                                                         |        |        |            |                                     |        |     |        |                                                                                                         |       |        |            |                                     | ARG616 | O   | GLU123 | OE2 | 3.583 |

(\*) C<sup>α</sup>-C<sup>α</sup> distances refer to the closed state of the complex reached via the bending modes 1 and 7 based on an RMSD of 4 Å from the initial structure. Residue pairs coming into close proximity (< 9 Å) are listed for mode 1 (in A) and mode 7 (C). The last column in A and C lists the C<sup>α</sup>-C<sup>α</sup> distances in initial PDB structure. Among those residue pairs, those making atom-atom contacts within 4 Å are listed in parts B and D. See also Figs. 5 and S4.

**Table S2. Summary of results from druggability simulations (\*)**

| PS1                         |                 |               | PS1 & APH-1                |                 |               | APH-1 & NCT (TM)         |                 |               |
|-----------------------------|-----------------|---------------|----------------------------|-----------------|---------------|--------------------------|-----------------|---------------|
|                             | run             | kcal/mol      |                            | run             | kcal/mol      |                          | run             | kcal/mol      |
| <b>R1: Catalytic cavity</b> |                 |               | <b>R4: TM1-TM8 (APH-1)</b> |                 |               | <b>R7: APH-1, NCT-TM</b> |                 |               |
| Intact                      | 1 <sup>st</sup> | -12.21        | Intact                     | 1 <sup>st</sup> | -12.48        | Intact                   | 1 <sup>st</sup> | -13.01        |
| Intact                      | 2 <sup>nd</sup> | -12.68        | Intact                     | 2 <sup>nd</sup> | -12.82        | Intact                   | 2 <sup>nd</sup> | -13.44        |
| Intact                      | 3 <sup>rd</sup> | -12.36        | Intact                     | 3 <sup>rd</sup> | -12.99        | Intact                   | 3 <sup>rd</sup> | -13.36        |
| PS1                         | 1 <sup>st</sup> | -13.67        | PS1                        | 1 <sup>st</sup> | -8.87         | AVG                      | all             | -13.27 ± 0.26 |
| PS1                         | 2 <sup>nd</sup> | -13.44        | PS1                        | 5 <sup>th</sup> | -10.68        |                          |                 |               |
| PS1                         | 3 <sup>rd</sup> | -14.36        | AVG                        | all             | -11.57 ± 2.70 |                          |                 |               |
| PS1                         | 4 <sup>th</sup> | -11.57        | <b>R5: TM9 top (APH-1)</b> |                 |               |                          |                 |               |
| PS1                         | 5 <sup>th</sup> | -13.63        | intact                     | 1 <sup>st</sup> | -9.08         |                          |                 |               |
| AVG                         | all             | -12.99 ± 1.42 | intact                     | 2 <sup>nd</sup> | -9.22         |                          |                 |               |
| <b>R2: Allosteric site</b>  |                 |               | PS1                        | 4 <sup>th</sup> | -9.94         |                          |                 |               |
| Intact                      | 2 <sup>nd</sup> | -11.84        | AVG                        | all             | -9.41 ± 0.53  |                          |                 |               |
| Intact                      | 3 <sup>rd</sup> | -9.93         | <b>R6: TM8-TM9 (APH-1)</b> |                 |               |                          |                 |               |
| PS1                         | 1 <sup>st</sup> | -9.74         | Intact                     | 2 <sup>nd</sup> | -11.76        |                          |                 |               |
| PS1                         | 4 <sup>th</sup> | -9.73         | Intact                     | 3 <sup>rd</sup> | -12.13        |                          |                 |               |
| PS1                         | 5 <sup>th</sup> | -9.49         | AVG                        | all             | -11.95 ± 0.19 |                          |                 |               |
| AVG                         | all             | -10.15 ± 1.69 |                            |                 |               |                          |                 |               |
| <b>R3: TM2-TM6-TM9</b>      |                 |               |                            |                 |               |                          |                 |               |
| intact                      | 1 <sup>st</sup> | -10.01        |                            |                 |               |                          |                 |               |
| intact                      | 2 <sup>nd</sup> | -9.90         |                            |                 |               |                          |                 |               |
| intact                      | 3 <sup>rd</sup> | -12.29        |                            |                 |               |                          |                 |               |
| PS1                         | 1 <sup>st</sup> | -11.32        |                            |                 |               |                          |                 |               |
| PS1                         | 2 <sup>nd</sup> | -11.05        |                            |                 |               |                          |                 |               |
| PS1                         | 3 <sup>rd</sup> | -11.17        |                            |                 |               |                          |                 |               |
| PS1                         | 4 <sup>th</sup> | -10.62        |                            |                 |               |                          |                 |               |
| PS1                         | 5 <sup>th</sup> | -10.78        |                            |                 |               |                          |                 |               |
| AVG                         | all             | -10.89 ± 1.40 |                            |                 |               |                          |                 |               |

  

| NCT                         |        |          |
|-----------------------------|--------|----------|
|                             | Region | kcal/mol |
| <b>NCT: Region RA to RE</b> |        |          |
| intact                      | RA     | -10.37   |
| Intact                      | RB     | -9.57    |
| intact                      | RC     | -8.45    |
| intact                      | RD     | -8.17    |
| intact                      | RE     | -8.14    |

(\*) Two sets of simulations were performed: (i) a set of 5 independent runs with only PS1 (called PS1 1<sup>st</sup> – 5<sup>th</sup>), and (ii) a set of 3 independent runs for the intact protein (called intact 1<sup>st</sup> – 3<sup>rd</sup>). The druggable sites are organized by the corresponding subunits. No druggable sites were detected on PEN2. The third column in each case lists the binding free energies. Simulations yielded 6 druggable sites (R1-R6) on PS1 (Figs. 9A-B and S8) including three (R4-R6) at the interface between PS1 and APH-1; one (R7) on APH-1 at the interface with the IC terminal helix of NCT (Fig. S8), and five sites on the EC subunit NCT, designated as RA - RE (Fig. 9C).
